# Supplementary material for: Structural and microstructural characterization and properties of new phases in the Nd–Sr–Co–(Fe/Mn)–O system as air-electrodes in SOFCs
Source: Royal Society of Chemistry journal article supplement (doi:10.1039/c6dt03970g), 2016-12-17
Supplement: c6dt03970g1.pdf [file c6dt03970g1.pdf]

## SUPPLEMENTARY INFORMATION

### Structural and microstructural characterization and properties of new phases in the Nd-Sr-Co-(Fe/Mn)-O system as air-electrodes in SOFCs

K. Boulahya, D. Muñoz Gil, M. Hassan, S. García Martín, U. Amador

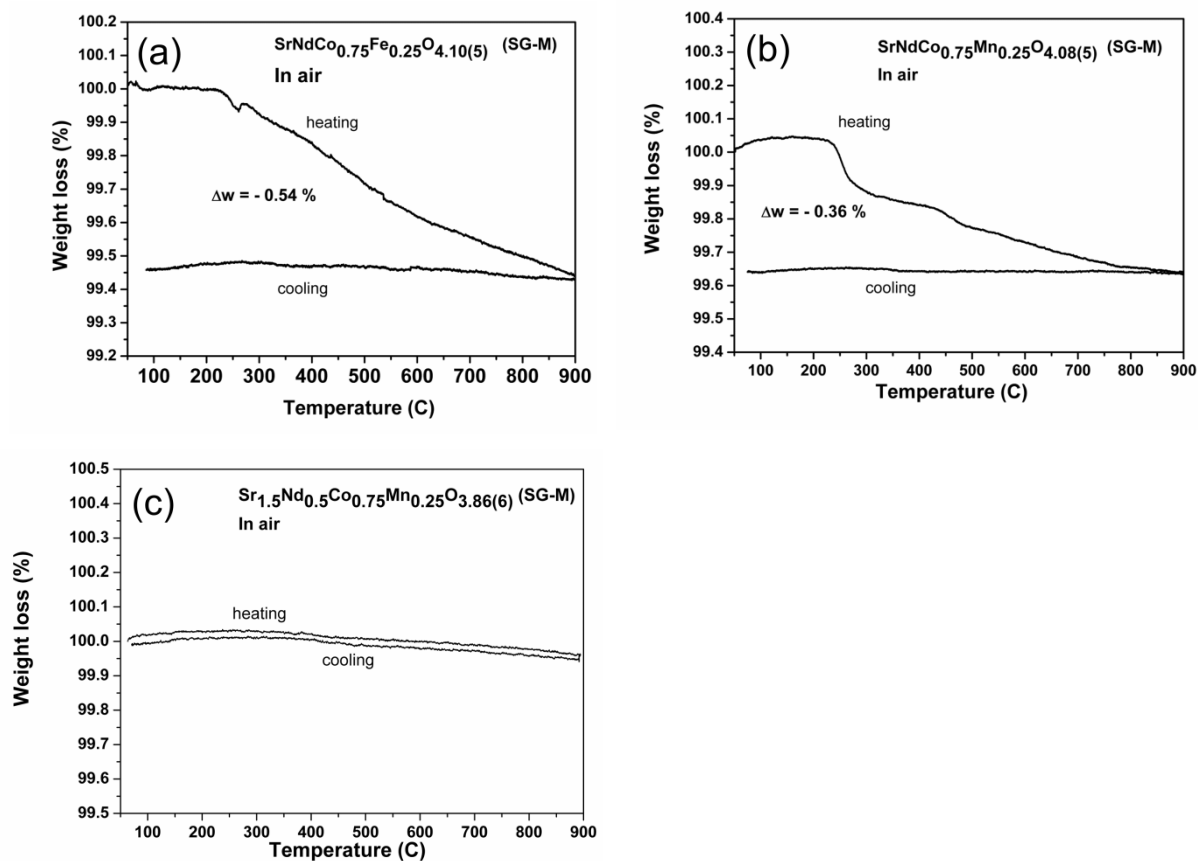

**Figure 1:** Thermogravimetric analyses of sample with nominal compositions (a)  $\text{SrNdCo}_{0.75}\text{Fe}_{0.25}\text{O}_4$ , (b)  $\text{SrNdCo}_{0.75}\text{Mn}_{0.25}\text{O}_4$  and (c)  $\text{Sr}_{1.5}\text{Nd}_{0.5}\text{Co}_{0.75}\text{Mn}_{0.25}\text{O}_4$ . The actual compositions are given in the figure.
