# Supplementary material for: Structural and microstructural characterization and properties of new phases in the Nd–Sr–Co–(Fe/Mn)–O system as air-electrodes in SOFCs
Source: Royal Society of Chemistry journal article supplement (doi:10.1039/c6dt03970g), 2016-12-17
Supplement: c6dt03970g2.dat [file c6dt03970g2.dat]

2Theta	Yobs	Ycal	Yobs-Ycal	Backg	Bragg	Posr	(hkl)	K
10.0000	2696.0	2669.9	-3494.0	2413.9	14.3702	0	( 0 0 2)	0 1
10.0197	2659.0	2669.9	-3504.9	2413.9	24.5768	0	( 1 0 1)	0 1
10.0394	2689.0	2669.9	-3474.9	2413.9	28.9462	0	( 0 0 4)	0 1
10.0591	2694.0	2669.9	-3469.9	2413.9	32.1134	0	( 1 0 3)	0 1
10.0788	2738.0	2669.9	-3425.9	2413.9	33.4338	0	( 1 1 0)	0 1
10.0985	2760.0	2669.9	-3403.9	2413.9	36.5512	0	( 1 1 2)	0 1
10.1182	2813.0	2669.9	-3350.9	2413.9	43.7623	0	( 1 0 5)	0 1
10.1379	2788.0	2669.9	-3375.9	2413.9	44.0204	0	( 0 0 6)	0 1
10.1576	2793.0	2669.9	-3370.9	2413.9	44.7859	0	( 1 1 4)	0 1
10.1773	2716.0	2669.9	-3447.9	2413.9	47.9943	0	( 2 0 0)	0 1
10.1971	2717.0	2669.9	-3446.9	2413.9	50.3560	0	( 2 0 2)	0 1
10.2168	2700.0	2669.9	-3463.9	2413.9	54.6365	0	( 2 1 1)	0 1
10.2365	2803.0	2669.9	-3360.9	2413.9	56.3720	0	( 1 1 6)	0 1
10.2562	2612.0	2669.9	-3551.9	2413.9	57.0128	0	( 2 0 4)	0 1
10.2759	2633.0	2669.9	-3530.9	2413.9	57.6505	0	( 1 0 7)	0 1
10.2956	2695.0	2669.9	-3468.9	2413.9	58.9097	0	( 2 1 3)	0 1
10.3153	2668.0	2669.9	-3495.9	2413.9	59.9489	0	( 0 0 8)	0 1
10.3350	2724.0	2669.9	-3439.9	2413.9	66.9428	0	( 2 1 5)	0 1
10.3547	2698.0	2669.9	-3465.9	2413.9	67.1372	0	( 2 0 6)	0 1
10.3744	2759.0	2669.9	-3404.9	2413.9	70.2053	0	( 2 2 0)	0 1
10.3941	2751.0	2669.9	-3412.9	2413.9	70.3967	0	( 1 1 8)	0 1
10.4138	2681.0	2669.9	-3482.9	2413.9	72.0932	0	( 2 2 2)	0 1
10.4335	2748.0	2669.9	-3415.9	2413.9	73.4047	0	( 1 0 9)	0 1
10.4532	2717.0	2669.9	-3446.9	2413.9	75.6273	0	( 3 0 1)	0 1
10.4729	2607.0	2669.9	-3556.9	2413.9	77.2836	0	( 0 0 10)	0 1
10.4926	2665.0	2669.9	-3498.9	2413.9	77.6475	0	( 2 2 4)	0 1
10.5123	2653.0	2669.9	-3510.9	2413.9	78.1964	0	( 2 1 7)	0 1
10.5320	2663.0	2669.9	-3500.9	2413.9	79.2883	0	( 3 0 3)	0 1
10.5518	2716.0	2669.9	-3447.9	2413.9	80.0145	0	( 3 1 0)	0 1
10.5715	2675.0	2669.9	-3488.9	2413.9	80.1974	0	( 2 0 8)	0 1
10.5912	2655.0	2669.9	-3508.9	2413.9	81.8237	0	( 3 1 2)	0 1
10.6109	2666.0	2669.9	-3497.9	2413.9	86.4942	0	( 3 0 5)	0 1
10.6306	2727.0	2669.9	-3436.9	2413.9	86.6734	0	( 2 2 6)	0 1
10.6503	2597.0	2669.9	-3566.9	2413.9	86.8539	0	( 1 1 10)	0 1
10.6700	2660.0	2669.9	-3503.9	2413.9	87.2096	0	( 3 1 4)	0 1
10.6897	2668.0	2669.9	-3495.9	2413.9	91.5005	0	( 1 0 11)	0 1
10.7094	2713.0	2669.9	-3450.9	2413.9	92.5719	0	( 2 1 9)	0 1
10.7291	2649.0	2669.9	-3514.9	2413.9	94.7179	0	( 3 2 1)	0 1
10.7488	2662.0	2669.9	-3501.9	2413.9	96.1542	0	( 3 1 6)	0 1
10.7685	2701.0	2669.9	-3462.9	2413.9	96.3354	0	( 2 0 10)	0 1
10.7882	2685.0	2669.9	-3478.9	2413.9	97.0559	0	( 0 0 12)	0 1
10.8079	2586.0	2669.9	-3577.9	2413.9	97.2335	0	( 3 0 7)	0 1
10.8276	2560.0	2669.9	-3603.9	2413.9	98.3142	0	( 3 2 3)	0 1
10.8473	2663.0	2669.9	-3500.9	2413.9	99.2192	0	( 2 2 8)	0 1
10.8670	2638.0	2669.9	-3525.9	2413.9	105.6226	0	( 3 2 5)	0 1
10.8867	2723.0	2669.9	-3440.9	2413.9	106.7415	0	( 1 1 12)	0 1
10.9065	2657.0	2669.9	-3506.9	2413.9	108.8010	0	( 4 0 0)	0 1
10.9262	2648.0	2669.9	-3515.9	2413.9	108.9914	0	( 3 1 8)	0 1
10.9459	2685.0	2669.9	-3478.9	2413.9	110.6988	0	( 4 0 2)	0 1
10.9656	2665.0	2669.9	-3498.9	2413.9	110.8928	0	( 2 1 11)	0 1
10.9853	2626.0	2669.9	-3537.9	2413.9	112.0433	0	( 3 0 9)	0 1
11.0050	2625.0	2669.9	-3538.9	2413.9	113.5957	0	( 1 0 13)	0 1
11.0247	2651.0	2669.9	-3512.9	2413.9	114.3731	0	( 4 1 1)	0 1
11.0444	2597.0	2669.9	-3566.9	2413.9	116.1531	0	( 2 2 10)	0 1
11.0641	2634.0	2669.9	-3529.9	2413.9	116.5494	0	( 4 0 4)	0 1
11.0838	2720.0	2669.9	-3443.9	2413.9	116.9529	0	( 2 0 12)	0 1
11.1035	2600.0	2669.9	-3563.9	2413.9	117.1508	0	( 3 2 7)	0 1
11.1232	2626.0	2669.9	-3537.9	2413.9	118.3605	0	( 4 1 3)	0 1
11.1429	2693.0	2669.9	-3470.9	2413.9	119.1752	0	( 3 3 0)	0 1
11.1626	2595.0	2669.9	-3568.9	2413.9	121.2418	0	( 3 3 2)	0 1
11.1823	2638.0	2669.9	-3525.9	2413.9
11.2020	2657.0	2672.8	-3509.8	2416.8
11.2217	2532.0	2669.9	-3631.9	2413.9
11.2414	2615.0	2666.9	-3545.9	2410.9
11.2612	2688.0	2663.9	-3469.9	2407.9
11.2809	2647.0	2660.9	-3507.9	2404.9
11.3006	2564.0	2657.9	-3587.9	2401.9
11.3203	2633.0	2654.9	-3515.9	2398.9
11.3400	2639.0	2652.0	-3507.0	2396.0
11.3597	2578.0	2649.0	-3565.0	2393.0
11.3794	2560.0	2646.0	-3580.0	2390.0
11.3991	2631.0	2643.0	-3506.0	2387.0
11.4188	2615.0	2640.0	-3519.0	2384.0
11.4385	2536.0	2637.0	-3595.0	2381.0
11.4582	2655.0	2634.1	-3473.1	2378.1
11.4779	2609.0	2631.1	-3516.1	2375.1
11.4976	2653.0	2628.1	-3469.1	2372.1
11.5173	2487.0	2625.1	-3632.1	2369.1
11.5370	2563.0	2622.1	-3553.1	2366.1
11.5567	2619.0	2619.1	-3494.1	2363.1
11.5764	2708.0	2616.2	-3402.2	2360.2
11.5961	2626.0	2613.2	-3481.2	2357.2
11.6159	2491.0	2610.2	-3613.2	2354.2
11.6356	2575.0	2607.2	-3526.2	2351.2
11.6553	2588.0	2604.2	-3510.2	2348.2
11.6750	2616.0	2601.2	-3479.2	2345.2
11.6947	2589.0	2598.2	-3503.2	2342.2
11.7144	2586.0	2595.3	-3503.3	2339.3
11.7341	2552.0	2592.3	-3534.3	2336.3
11.7538	2594.0	2589.3	-3489.3	2333.3
11.7735	2560.0	2586.3	-3520.3	2330.3
11.7932	2525.0	2583.3	-3552.3	2327.3
11.8129	2570.0	2580.3	-3504.3	2324.3
11.8326	2579.0	2577.4	-3492.4	2321.4
11.8523	2617.0	2574.4	-3451.4	2318.4
11.8720	2539.0	2571.4	-3526.4	2315.4
11.8917	2482.0	2568.4	-3580.4	2312.4
11.9114	2570.0	2565.4	-3489.4	2309.4
11.9311	2612.0	2562.4	-3444.4	2306.4
11.9508	2537.0	2559.5	-3516.5	2303.5
11.9705	2498.0	2556.5	-3552.5	2300.5
11.9903	2576.0	2553.5	-3471.5	2297.5
12.0100	2556.0	2550.5	-3488.5	2294.5
12.0297	2555.0	2547.5	-3486.5	2291.5
12.0494	2414.0	2544.5	-3624.5	2288.5
12.0691	2539.0	2541.6	-3496.6	2285.6
12.0888	2479.0	2538.6	-3553.6	2282.6
12.1085	2493.0	2535.6	-3536.6	2279.6
12.1282	2534.0	2532.6	-3492.6	2276.6
12.1479	2466.0	2529.6	-3557.6	2273.6
12.1676	2525.0	2526.6	-3495.6	2270.6
12.1873	2456.0	2523.7	-3561.7	2267.7
12.2070	2509.0	2520.7	-3505.7	2264.7
12.2267	2491.0	2517.7	-3520.7	2261.7
12.2464	2512.0	2514.7	-3496.7	2258.7
12.2661	2523.0	2511.7	-3482.7	2255.7
12.2858	2617.0	2508.7	-3385.7	2252.7
12.3055	2443.0	2505.8	-3556.8	2249.8
12.3252	2543.0	2502.8	-3453.8	2246.8
12.3450	2541.0	2499.8	-3452.8	2243.8
12.3647	2524.0	2496.8	-3466.8	2240.8
12.3844	2438.0	2493.8	-3549.8	2237.8
12.4041	2553.0	2490.8	-3431.8	2234.8
12.4238	2486.0	2487.8	-3495.8	2231.8
12.4435	2481.0	2484.9	-3497.9	2228.9
12.4632	2423.0	2481.9	-3552.9	2225.9
12.4829	2474.0	2478.9	-3498.9	2222.9
12.5026	2553.0	2475.9	-3416.9	2219.9
12.5223	2459.0	2472.9	-3507.9	2216.9
12.5420	2521.0	2469.9	-3442.9	2213.9
12.5617	2402.0	2467.0	-3559.0	2211.0
12.5814	2425.0	2464.0	-3533.0	2208.0
12.6011	2495.0	2461.0	-3460.0	2205.0
12.6208	2466.0	2458.0	-3486.0	2202.0
12.6405	2486.0	2455.0	-3463.0	2199.0
12.6602	2474.0	2452.0	-3472.0	2196.0
12.6799	2464.0	2449.1	-3479.1	2193.1
12.6997	2418.0	2446.1	-3522.1	2190.1
12.7194	2508.0	2443.1	-3429.1	2187.1
12.7391	2456.0	2440.1	-3478.1	2184.1
12.7588	2414.0	2437.1	-3517.1	2181.1
12.7785	2439.0	2434.1	-3489.1	2178.1
12.7982	2554.0	2431.2	-3371.2	2175.2
12.8179	2413.0	2428.2	-3509.2	2172.2
12.8376	2440.0	2425.2	-3479.2	2169.2
12.8573	2396.0	2422.2	-3520.2	2166.2
12.8770	2449.0	2419.2	-3464.2	2163.2
12.8967	2360.0	2416.2	-3550.2	2160.2
12.9164	2440.0	2413.5	-3467.5	2157.5
12.9361	2485.0	2410.7	-3419.7	2154.7
12.9558	2460.0	2408.0	-3442.0	2152.0
12.9755	2384.0	2405.2	-3515.2	2149.2
12.9952	2391.0	2402.5	-3505.5	2146.5
13.0149	2422.0	2399.7	-3471.7	2143.7
13.0346	2490.0	2397.0	-3401.0	2141.0
13.0544	2308.0	2394.2	-3580.2	2138.2
13.0741	2479.0	2391.4	-3406.4	2135.4
13.0938	2416.0	2388.7	-3466.7	2132.7
13.1135	2368.0	2385.9	-3511.9	2129.9
13.1332	2317.0	2383.2	-3560.2	2127.2
13.1529	2422.0	2380.4	-3452.4	2124.4
13.1726	2425.0	2377.7	-3446.7	2121.7
13.1923	2392.0	2374.9	-3476.9	2118.9
13.2120	2275.0	2372.2	-3591.2	2116.2
13.2317	2393.0	2369.4	-3470.4	2113.4
13.2514	2439.0	2366.6	-3421.6	2110.6
13.2711	2366.0	2363.9	-3491.9	2107.9
13.2908	2417.0	2361.1	-3438.1	2105.1
13.3105	2393.0	2358.4	-3459.4	2102.4
13.3302	2352.0	2355.6	-3497.6	2099.6
13.3499	2356.0	2352.9	-3490.9	2096.9
13.3696	2336.0	2350.1	-3508.1	2094.1
13.3893	2374.0	2347.4	-3467.4	2091.4
13.4091	2449.0	2344.6	-3389.6	2088.6
13.4288	2365.0	2341.8	-3470.8	2085.8
13.4485	2481.0	2339.1	-3352.1	2083.1
13.4682	2339.0	2336.3	-3491.3	2080.3
13.4879	2407.0	2333.6	-3420.6	2077.6
13.5076	2377.0	2330.8	-3447.8	2074.8
13.5273	2348.0	2328.1	-3474.1	2072.1
13.5470	2319.0	2325.3	-3500.3	2069.3
13.5667	2463.0	2322.6	-3353.6	2066.6
13.5864	2286.0	2319.8	-3527.8	2063.8
13.6061	2325.0	2317.1	-3486.1	2061.1
13.6258	2383.0	2314.3	-3425.3	2058.3
13.6455	2359.0	2311.5	-3446.5	2055.5
13.6652	2417.0	2308.8	-3385.8	2052.8
13.6849	2331.0	2306.0	-3469.0	2050.0
13.7046	2416.0	2303.3	-3381.3	2047.3
13.7243	2281.0	2300.5	-3513.5	2044.5
13.7440	2346.0	2297.8	-3445.8	2041.8
13.7638	2381.0	2295.0	-3408.0	2039.0
13.7835	2325.0	2292.3	-3461.3	2036.3
13.8032	2198.0	2292.0	-3588.0	2033.5
13.8229	2340.0	2289.4	-3443.4	2030.7
13.8426	2253.0	2286.8	-3527.8	2028.0
13.8623	2386.0	2284.3	-3392.3	2025.2
13.8820	2340.0	2281.8	-3435.8	2022.5
13.9017	2400.0	2279.3	-3373.3	2019.7
13.9214	2297.0	2276.9	-3473.9	2017.0
13.9411	2238.0	2274.5	-3530.5	2014.2
13.9608	2195.0	2272.2	-3571.2	2011.5
13.9805	2323.0	2270.8	-3441.8	2009.6
14.0002	2265.0	2269.5	-3498.5	2007.7
14.0199	2285.0	2268.3	-3477.3	2005.9
14.0396	2302.0	2267.2	-3459.2	2004.0
14.0593	2283.0	2266.3	-3477.3	2002.1
14.0790	2363.0	2265.5	-3396.5	2000.3
14.0987	2268.0	2265.0	-3491.0	1998.4
14.1184	2305.0	2264.8	-3453.8	1996.5
14.1382	2298.0	2265.1	-3461.1	1994.6
14.1579	2285.0	2265.9	-3474.9	1992.8
14.1776	2239.0	2267.6	-3522.6	1990.9
14.1973	2287.0	2270.5	-3477.5	1989.0
14.2170	2266.0	2275.2	-3503.2	1987.2
14.2367	2291.0	2282.8	-3485.8	1985.3
14.2564	2324.0	2296.0	-3466.0	1983.4
14.2761	2352.0	2323.3	-3465.3	1981.6
14.2958	2423.0	2388.6	-3459.6	1979.7
14.3155	2539.0	2537.8	-3492.8	1977.8
14.3352	2677.0	2808.0	-3625.0	1976.0
14.3549	2657.0	3134.8	-3971.8	1974.1
14.3746	2646.0	3244.0	-4092.0	1972.2
14.3943	2625.0	2991.2	-3860.2	1970.3
14.4140	2477.0	2665.6	-3682.6	1968.5
14.4337	2338.0	2446.1	-3602.1	1966.6
14.4534	2336.0	2336.8	-3494.8	1964.7
14.4731	2325.0	2289.0	-3458.0	1962.9
14.4929	2251.0	2265.8	-3508.8	1961.0
14.5126	2245.0	2251.9	-3500.9	1959.1
14.5323	2297.0	2242.1	-3439.1	1957.3
14.5520	2363.0	2234.5	-3365.5	1955.4
14.5717	2272.0	2228.5	-3450.5	1953.5
14.5914	2262.0	2223.5	-3455.5	1951.7
14.6111	2208.0	2219.2	-3505.2	1949.8
14.6308	2235.0	2215.4	-3474.4	1947.9
14.6505	2194.0	2212.0	-3512.0	1946.1
14.6702	2171.0	2208.9	-3531.9	1944.2
14.6899	2283.0	2206.0	-3417.0	1942.3
14.7096	2161.0	2203.3	-3536.3	1940.4
14.7293	2224.0	2200.7	-3470.7	1938.6
14.7490	2113.0	2198.2	-3579.2	1936.7
14.7687	2239.0	2195.8	-3450.8	1934.8
14.7884	2236.0	2193.5	-3451.5	1933.0
14.8081	2180.0	2191.2	-3505.2	1931.1
14.8278	2209.0	2189.0	-3474.0	1929.2
14.8476	2238.0	2186.8	-3442.8	1927.4
14.8673	2216.0	2184.7	-3462.7	1925.5
14.8870	2267.0	2182.6	-3409.6	1923.6
14.9067	2163.0	2180.5	-3511.5	1921.8
14.9264	2200.0	2178.5	-3472.5	1919.9
14.9461	2184.0	2176.4	-3486.4	1918.0
14.9658	2232.0	2172.1	-3434.1	1916.1
14.9855	2159.0	2170.3	-3505.3	1914.3
15.0052	2182.0	2168.4	-3480.4	1912.4
15.0249	2194.0	2166.5	-3466.5	1910.5
15.0446	2198.0	2164.7	-3460.7	1908.7
15.0643	2088.0	2162.8	-3568.8	1906.8
15.0840	2044.0	2160.9	-3610.9	1904.9
15.1037	2115.0	2159.1	-3538.1	1903.1
15.1234	2162.0	2157.2	-3489.2	1901.2
15.1431	2149.0	2155.3	-3500.3	1899.3
15.1628	2251.0	2153.5	-3396.5	1897.5
15.1825	2149.0	2151.6	-3496.6	1895.6
15.2023	2056.0	2149.7	-3587.7	1893.7
15.2220	2054.0	2147.9	-3587.9	1891.9
15.2417	2176.0	2146.0	-3464.0	1890.0
15.2614	2078.0	2144.1	-3560.1	1888.1
15.2811	2195.0	2142.2	-3441.2	1886.2
15.3008	2148.0	2140.4	-3486.4	1884.4
15.3205	2183.0	2138.5	-3449.5	1882.5
15.3402	2155.0	2136.6	-3475.6	1880.6
15.3599	2095.0	2134.8	-3533.8	1878.8
15.3796	2094.0	2132.9	-3532.9	1876.9
15.3993	2087.0	2131.0	-3538.0	1875.0
15.4190	2177.0	2129.2	-3446.2	1873.2
15.4387	2183.0	2127.3	-3438.3	1871.3
15.4584	2218.0	2125.4	-3401.4	1869.4
15.4781	2091.0	2123.6	-3526.6	1867.6
15.4978	2080.0	2121.7	-3535.7	1865.7
15.5175	2194.0	2119.8	-3419.8	1863.8
15.5372	2183.0	2118.0	-3429.0	1862.0
15.5570	2149.0	2116.1	-3461.1	1860.1
15.5767	2073.0	2114.2	-3535.2	1858.2
15.5964	2108.0	2112.3	-3498.3	1856.3
15.6161	2037.0	2110.5	-3567.5	1854.5
15.6358	2104.0	2108.0	-3498.0	1852.0
15.6555	2119.0	2105.4	-3480.4	1849.4
15.6752	2102.0	2102.9	-3494.9	1846.9
15.6949	2104.0	2100.4	-3490.4	1844.4
15.7146	2065.0	2097.9	-3526.9	1841.9
15.7343	2151.0	2095.4	-3438.4	1839.4
15.7540	2148.0	2092.8	-3438.8	1836.8
15.7737	2038.0	2090.3	-3546.3	1834.3
15.7934	2100.0	2087.8	-3481.8	1831.8
15.8131	2096.0	2085.3	-3483.3	1829.3
15.8328	2049.0	2082.7	-3527.7	1826.7
15.8525	2045.0	2080.2	-3529.2	1824.2
15.8722	2173.0	2077.7	-3398.7	1821.7
15.8919	2079.0	2075.2	-3490.2	1819.2
15.9117	2087.0	2072.7	-3479.7	1816.7
15.9314	2056.0	2070.1	-3508.1	1814.1
15.9511	2154.0	2067.6	-3407.6	1811.6
15.9708	2014.0	2065.1	-3545.1	1809.1
15.9905	2111.0	2062.6	-3445.6	1806.6
16.0102	2069.0	2060.0	-3485.0	1804.0
16.0299	2033.0	2057.5	-3518.5	1801.5
16.0496	2060.0	2055.0	-3489.0	1799.0
16.0693	2104.0	2052.5	-3442.5	1796.5
16.0890	2102.0	2050.0	-3442.0	1794.0
16.1087	2106.0	2047.4	-3435.4	1791.4
16.1284	2071.0	2044.9	-3467.9	1788.9
16.1481	2065.0	2042.4	-3471.4	1786.4
16.1678	2073.0	2039.9	-3460.9	1783.9
16.1875	2037.0	2037.4	-3494.4	1781.4
16.2072	2023.0	2034.8	-3505.8	1778.8
16.2269	2073.0	2032.3	-3453.3	1776.3
16.2466	2011.0	2029.8	-3512.8	1773.8
16.2663	1981.0	2027.3	-3540.3	1771.3
16.2861	2043.0	2024.7	-3475.7	1768.7
16.3058	2028.0	2022.2	-3488.2	1766.2
16.3255	2041.0	2019.7	-3472.7	1763.7
16.3452	1963.0	2017.2	-3548.2	1761.2
16.3649	2015.0	2014.7	-3493.7	1758.7
16.3846	2015.0	2012.1	-3491.1	1756.1
16.4043	2029.0	2009.6	-3474.6	1753.6
16.4240	2061.0	2007.1	-3440.1	1751.1
16.4437	2000.0	2004.6	-3498.6	1748.6
16.4634	1962.0	2002.1	-3534.1	1746.1
16.4831	2023.0	1999.5	-3470.5	1743.5
16.5028	1878.0	1997.0	-3613.0	1741.0
16.5225	2028.0	1994.5	-3460.5	1738.5
16.5422	1967.0	1992.0	-3519.0	1736.0
16.5619	1967.0	1989.5	-3516.5	1733.5
16.5816	1958.0	1986.9	-3522.9	1730.9
16.6013	2012.0	1984.4	-3466.4	1728.4
16.6210	2009.0	1981.9	-3466.9	1725.9
16.6408	1994.0	1979.4	-3479.4	1723.4
16.6605	2009.0	1976.8	-3461.8	1720.8
16.6802	1947.0	1974.3	-3521.3	1718.3
16.6999	1997.0	1971.8	-3468.8	1715.8
16.7196	1912.0	1969.3	-3551.3	1713.3
16.7393	2039.0	1966.8	-3421.8	1710.8
16.7590	2009.0	1964.2	-3449.2	1708.2
16.7787	1888.0	1961.7	-3567.7	1705.7
16.7984	1964.0	1959.2	-3489.2	1703.2
16.8181	1999.0	1956.7	-3451.7	1700.7
16.8378	2003.0	1954.2	-3445.2	1698.2
16.8575	1925.0	1951.6	-3520.6	1695.6
16.8772	1976.0	1949.1	-3467.1	1693.1
16.8969	1875.0	1946.6	-3565.6	1690.6
16.9166	1943.0	1944.1	-3495.1	1688.1
16.9363	2036.0	1941.5	-3399.5	1685.5
16.9560	1881.0	1939.0	-3552.0	1683.0
16.9757	1924.0	1936.5	-3506.5	1680.5
16.9955	1932.0	1934.0	-3496.0	1678.0
17.0152	1937.0	1931.5	-3488.5	1675.5
17.0349	1943.0	1928.9	-3479.9	1672.9
17.0546	1889.0	1926.4	-3531.4	1670.4
17.0743	1972.0	1923.9	-3445.9	1667.9
17.0940	1871.0	1921.4	-3544.4	1665.4
17.1137	1884.0	1918.8	-3528.8	1662.8
17.1334	1960.0	1916.3	-3450.3	1660.3
17.1531	1882.0	1913.8	-3525.8	1657.8
17.1728	2009.0	1911.3	-3396.3	1655.3
17.1925	1987.0	1908.8	-3415.8	1652.8
17.2122	1880.0	1906.2	-3520.2	1650.2
17.2319	1838.0	1903.7	-3559.7	1647.7
17.2516	1962.0	1901.2	-3433.2	1645.2
17.2713	1863.0	1898.7	-3529.7	1642.7
17.2910	1852.0	1896.2	-3538.2	1640.2
17.3107	1903.0	1893.6	-3484.6	1637.6
17.3304	1831.0	1891.1	-3554.1	1635.1
17.3502	1925.0	1888.8	-3457.8	1632.8
17.3699	1935.0	1886.4	-3445.4	1630.4
17.3896	1856.0	1884.0	-3522.0	1628.0
17.4093	1869.0	1881.7	-3506.7	1625.7
17.4290	1840.0	1879.3	-3533.3	1623.3
17.4487	1824.0	1877.0	-3547.0	1621.0
17.4684	1871.0	1874.6	-3497.6	1618.6
17.4881	1937.0	1872.3	-3429.3	1616.3
17.5078	1898.0	1869.9	-3465.9	1613.9
17.5275	1871.0	1867.5	-3490.5	1611.5
17.5472	1849.0	1865.2	-3510.2	1609.2
17.5669	1921.0	1862.8	-3435.8	1606.8
17.5866	1832.0	1860.5	-3522.5	1604.5
17.6063	1836.0	1858.1	-3516.1	1602.1
17.6260	1800.0	1855.8	-3549.8	1599.8
17.6457	1805.0	1853.4	-3542.4	1597.4
17.6654	1889.0	1851.1	-3456.1	1595.1
17.6851	1820.0	1848.7	-3522.7	1592.7
17.7049	1826.0	1846.3	-3514.3	1590.3
17.7246	1943.0	1844.0	-3395.0	1588.0
17.7443	1848.0	1841.6	-3487.6	1585.6
17.7640	1809.0	1839.3	-3524.3	1583.3
17.7837	1761.0	1836.9	-3569.9	1580.9
17.8034	1916.0	1834.5	-3412.5	1578.5
17.8231	1765.0	1832.2	-3561.2	1576.2
17.8428	1783.0	1829.8	-3540.8	1573.8
17.8625	1840.0	1827.5	-3481.5	1571.5
17.8822	1854.0	1825.1	-3465.1	1569.1
17.9019	1897.0	1822.8	-3419.8	1566.8
17.9216	1880.0	1820.4	-3434.4	1564.4
17.9413	1867.0	1818.1	-3445.1	1562.1
17.9610	1807.0	1815.7	-3502.7	1559.7
17.9807	1814.0	1813.3	-3493.3	1557.3
18.0004	1817.0	1811.0	-3488.0	1555.0
18.0201	1834.0	1808.6	-3468.6	1552.6
18.0398	1881.0	1806.3	-3419.3	1550.3
18.0595	1824.0	1803.9	-3473.9	1547.9
18.0793	1807.0	1801.5	-3488.5	1545.5
18.0990	1769.0	1799.2	-3524.2	1543.2
18.1187	1781.0	1796.8	-3509.8	1540.8
18.1384	1709.0	1794.5	-3579.5	1538.5
18.1581	1801.0	1792.1	-3485.1	1536.1
18.1778	1782.0	1789.8	-3501.8	1533.8
18.1975	1817.0	1787.4	-3464.4	1531.4
18.2172	1743.0	1785.1	-3536.1	1529.1
18.2369	1711.0	1782.7	-3565.7	1526.7
18.2566	1766.0	1780.3	-3508.3	1524.3
18.2763	1823.0	1778.0	-3449.0	1522.0
18.2960	1751.0	1775.6	-3518.6	1519.6
18.3157	1729.0	1773.3	-3538.3	1517.3
18.3354	1763.0	1770.9	-3501.9	1514.9
18.3551	1781.0	1768.6	-3481.6	1512.6
18.3748	1696.0	1766.2	-3564.2	1510.2
18.3945	1811.0	1763.8	-3446.8	1507.8
18.4142	1740.0	1761.5	-3515.5	1505.5
18.4340	1734.0	1759.1	-3519.1	1503.1
18.4537	1779.0	1756.8	-3471.8	1500.8
18.4734	1760.0	1754.4	-3488.4	1498.4
18.4931	1736.0	1752.1	-3510.1	1496.1
18.5128	1705.0	1749.7	-3538.7	1493.7
18.5325	1681.0	1747.3	-3560.3	1491.3
18.5522	1794.0	1745.7	-3445.7	1489.7
18.5719	1783.0	1744.1	-3455.1	1488.1
18.5916	1756.0	1742.4	-3480.4	1486.4
18.6113	1795.0	1740.8	-3439.8	1484.8
18.6310	1687.0	1739.2	-3546.2	1483.2
18.6507	1784.0	1737.5	-3447.5	1481.5
18.6704	1793.0	1735.9	-3436.9	1479.9
18.6901	1752.0	1734.3	-3476.3	1478.3
18.7098	1761.0	1732.6	-3465.6	1476.6
18.7295	1715.0	1731.0	-3510.0	1475.0
18.7492	1746.0	1729.4	-3477.4	1473.4
18.7689	1709.0	1727.7	-3512.7	1471.7
18.7887	1706.0	1726.1	-3514.1	1470.1
18.8084	1793.0	1724.4	-3425.4	1468.4
18.8281	1691.0	1722.8	-3525.8	1466.8
18.8478	1772.0	1721.2	-3443.2	1465.2
18.8675	1704.0	1719.5	-3509.5	1463.5
18.8872	1685.0	1717.9	-3526.9	1461.9
18.9069	1709.0	1716.3	-3501.3	1460.3
18.9266	1783.0	1714.6	-3425.6	1458.6
18.9463	1801.0	1713.0	-3406.0	1457.0
18.9660	1708.0	1711.4	-3497.4	1455.4
18.9857	1735.0	1709.7	-3468.7	1453.7
19.0054	1644.0	1708.1	-3558.1	1452.1
19.0251	1761.0	1706.5	-3439.5	1450.5
19.0448	1675.0	1704.8	-3523.8	1448.8
19.0645	1755.0	1703.2	-3442.2	1447.2
19.0842	1679.0	1701.5	-3516.5	1445.5
19.1039	1733.0	1699.9	-3460.9	1443.9
19.1236	1743.0	1698.3	-3449.3	1442.3
19.1434	1745.0	1696.6	-3445.6	1440.6
19.1631	1674.0	1695.0	-3515.0	1439.0
19.1828	1689.0	1693.4	-3498.4	1437.4
19.2025	1634.0	1691.7	-3551.7	1435.7
19.2222	1617.0	1690.1	-3567.1	1434.1
19.2419	1675.0	1688.5	-3507.5	1432.5
19.2616	1703.0	1686.8	-3477.8	1430.8
19.2813	1714.0	1685.2	-3465.2	1429.2
19.3010	1748.0	1683.6	-3429.6	1427.6
19.3207	1603.0	1681.9	-3572.9	1425.9
19.3404	1682.0	1680.3	-3492.3	1424.3
19.3601	1683.0	1678.6	-3489.6	1422.6
19.3798	1616.0	1677.0	-3555.0	1421.0
19.3995	1639.0	1675.4	-3530.4	1419.4
19.4192	1701.0	1673.7	-3466.7	1417.7
19.4389	1659.0	1672.1	-3507.1	1416.1
19.4586	1662.0	1670.5	-3502.5	1414.5
19.4783	1602.0	1668.8	-3560.8	1412.8
19.4981	1735.0	1667.2	-3426.2	1411.2
19.5178	1708.0	1665.6	-3451.6	1409.6
19.5375	1636.0	1663.9	-3521.9	1407.9
19.5572	1613.0	1662.3	-3543.3	1406.3
19.5769	1613.0	1660.7	-3541.7	1404.7
19.5966	1588.0	1659.0	-3565.0	1403.0
19.6163	1659.0	1657.4	-3492.4	1401.4
19.6360	1626.0	1655.7	-3523.7	1399.7
19.6557	1693.0	1654.1	-3455.1	1398.1
19.6754	1599.0	1652.5	-3547.5	1396.5
19.6951	1672.0	1650.8	-3472.8	1394.8
19.7148	1672.0	1649.2	-3471.2	1393.2
19.7345	1653.0	1647.6	-3488.6	1391.6
19.7542	1643.0	1645.9	-3496.9	1389.9
19.7739	1628.0	1644.3	-3510.3	1388.3
19.7936	1633.0	1642.7	-3503.7	1386.7
19.8133	1691.0	1641.0	-3444.0	1385.0
19.8330	1657.0	1639.4	-3476.4	1383.4
19.8528	1767.0	1637.8	-3364.8	1381.7
19.8725	1631.0	1636.1	-3499.1	1380.1
19.8922	1586.0	1634.5	-3542.5	1378.5
19.9119	1656.0	1632.8	-3470.8	1376.8
19.9316	1557.0	1631.2	-3568.2	1375.2
19.9513	1585.0	1629.6	-3538.6	1373.6
19.9710	1636.0	1627.9	-3485.9	1371.9
19.9907	1652.0	1626.3	-3468.3	1370.3
20.0104	1643.0	1624.7	-3475.7	1368.7
20.0301	1646.0	1623.0	-3471.0	1367.0
20.0498	1628.0	1621.4	-3487.4	1365.4
20.0695	1667.0	1619.8	-3446.8	1363.8
20.0892	1577.0	1618.1	-3535.1	1362.1
20.1089	1646.0	1616.5	-3464.5	1360.5
20.1286	1637.0	1614.9	-3471.9	1358.9
20.1483	1580.0	1613.2	-3527.2	1357.2
20.1680	1622.0	1611.6	-3483.6	1355.6
20.1877	1638.0	1610.0	-3466.0	1354.0
20.2074	1578.0	1608.3	-3524.3	1352.3
20.2272	1645.0	1606.7	-3455.7	1350.7
20.2469	1589.0	1605.0	-3510.0	1349.0
20.2666	1577.0	1603.4	-3520.4	1347.4
20.2863	1583.0	1601.8	-3512.8	1345.8
20.3060	1548.0	1600.1	-3546.1	1344.1
20.3257	1644.0	1598.6	-3448.6	1342.6
20.3454	1667.0	1597.0	-3424.0	1341.0
20.3651	1585.0	1595.4	-3504.4	1339.4
20.3848	1624.0	1593.8	-3463.8	1337.8
20.4045	1562.0	1592.2	-3524.2	1336.2
20.4242	1591.0	1590.7	-3493.7	1334.7
20.4439	1618.0	1589.1	-3465.1	1333.1
20.4636	1528.0	1587.5	-3553.5	1331.5
20.4833	1513.0	1585.9	-3566.9	1329.9
20.5030	1553.0	1584.3	-3525.3	1328.3
20.5227	1642.0	1582.8	-3434.8	1326.8
20.5424	1547.0	1581.2	-3528.2	1325.2
20.5621	1620.0	1579.6	-3453.6	1323.6
20.5819	1559.0	1578.0	-3513.0	1322.0
20.6016	1587.0	1576.4	-3483.4	1320.4
20.6213	1534.0	1574.9	-3534.9	1318.9
20.6410	1557.0	1573.3	-3510.3	1317.3
20.6607	1556.0	1571.7	-3509.7	1315.7
20.6804	1591.0	1570.1	-3473.1	1314.1
20.7001	1580.0	1568.5	-3482.5	1312.5
20.7198	1557.0	1567.0	-3504.0	1311.0
20.7395	1521.0	1565.4	-3538.4	1309.4
20.7592	1565.0	1563.8	-3492.8	1307.8
20.7789	1641.0	1562.2	-3415.2	1306.2
20.7986	1504.0	1560.7	-3550.7	1304.7
20.8183	1585.0	1559.1	-3468.1	1303.1
20.8380	1586.0	1557.5	-3465.5	1301.5
20.8577	1586.0	1555.9	-3463.9	1299.9
20.8774	1623.0	1554.3	-3425.3	1298.3
20.8971	1568.0	1552.8	-3478.8	1296.8
20.9168	1521.0	1551.2	-3524.2	1295.2
20.9366	1560.0	1549.6	-3483.6	1293.6
20.9563	1512.0	1548.0	-3530.0	1292.0
20.9760	1627.0	1546.4	-3413.4	1290.4
20.9957	1508.0	1544.9	-3530.9	1288.9
21.0154	1582.0	1543.3	-3455.3	1287.3
21.0351	1544.0	1541.7	-3491.7	1285.7
21.0548	1576.0	1540.1	-3458.1	1284.1
21.0745	1577.0	1538.5	-3455.5	1282.5
21.0942	1528.0	1537.0	-3503.0	1281.0
21.1139	1595.0	1535.4	-3434.4	1279.4
21.1336	1527.0	1533.8	-3500.8	1277.8
21.1533	1512.0	1532.2	-3514.2	1276.2
21.1730	1563.0	1530.6	-3461.6	1274.6
21.1927	1538.0	1529.1	-3485.1	1273.1
21.2124	1508.0	1527.5	-3513.5	1271.5
21.2321	1561.0	1525.9	-3458.9	1269.9
21.2518	1475.0	1524.3	-3543.3	1268.3
21.2715	1544.0	1522.8	-3472.8	1266.7
21.2913	1540.0	1521.2	-3475.2	1265.2
21.3110	1475.0	1519.6	-3538.6	1263.6
21.3307	1539.0	1518.0	-3473.0	1262.0
21.3504	1577.0	1516.4	-3433.4	1260.4
21.3701	1506.0	1514.8	-3502.8	1258.8
21.3898	1520.0	1513.3	-3487.3	1257.3
21.4095	1475.0	1511.7	-3530.7	1255.7
21.4292	1511.0	1510.1	-3493.1	1254.1
21.4489	1488.0	1508.5	-3514.5	1252.5
21.4686	1435.0	1507.0	-3566.0	1251.0
21.4883	1466.0	1505.8	-3533.8	1249.8
21.5080	1502.0	1504.7	-3496.7	1248.7
21.5277	1482.0	1503.6	-3515.6	1247.6
21.5474	1523.0	1502.5	-3473.5	1246.5
21.5671	1507.0	1501.4	-3488.4	1245.4
21.5868	1463.0	1500.3	-3531.3	1244.3
21.6065	1463.0	1499.2	-3530.2	1243.2
21.6262	1548.0	1498.1	-3444.1	1242.1
21.6460	1506.0	1497.0	-3485.0	1241.0
21.6657	1448.0	1495.9	-3541.9	1239.9
21.6854	1487.0	1494.8	-3501.8	1238.8
21.7051	1503.0	1493.7	-3484.7	1237.7
21.7248	1456.0	1492.6	-3530.6	1236.6
21.7445	1475.0	1491.5	-3510.5	1235.5
21.7642	1539.0	1490.4	-3445.4	1234.4
21.7839	1517.0	1489.3	-3466.3	1233.3
21.8036	1509.0	1488.2	-3473.2	1232.2
21.8233	1523.0	1487.0	-3458.0	1231.0
21.8430	1554.0	1485.9	-3425.9	1229.9
21.8627	1460.0	1484.8	-3518.8	1228.8
21.8824	1460.0	1483.7	-3517.7	1227.7
21.9021	1488.0	1482.6	-3488.6	1226.6
21.9218	1485.0	1481.5	-3490.5	1225.5
21.9415	1518.0	1480.4	-3456.4	1224.4
21.9612	1417.0	1479.3	-3556.3	1223.3
21.9809	1485.0	1478.2	-3487.2	1222.2
22.0006	1440.0	1477.1	-3531.1	1221.1
22.0204	1420.0	1476.0	-3550.0	1220.0
22.0401	1466.0	1474.9	-3502.9	1218.9
22.0598	1458.0	1473.8	-3509.8	1217.8
22.0795	1418.0	1472.7	-3548.7	1216.7
22.0992	1493.0	1471.6	-3472.6	1215.6
22.1189	1454.0	1470.5	-3510.5	1214.5
22.1386	1436.0	1469.4	-3527.4	1213.4
22.1583	1512.0	1468.2	-3450.2	1212.2
22.1780	1502.0	1467.1	-3459.1	1211.1
22.1977	1508.0	1466.0	-3452.0	1210.0
22.2174	1508.0	1464.9	-3450.9	1208.9
22.2371	1403.0	1463.8	-3554.8	1207.8
22.2568	1466.0	1462.7	-3490.7	1206.7
22.2765	1538.0	1461.6	-3417.6	1205.6
22.2962	1458.0	1460.5	-3496.5	1204.5
22.3159	1419.0	1459.4	-3534.4	1203.4
22.3356	1478.0	1458.3	-3474.3	1202.3
22.3553	1476.0	1457.2	-3475.2	1201.2
22.3751	1488.0	1456.1	-3462.1	1200.1
22.3948	1486.0	1455.0	-3463.0	1199.0
22.4145	1437.0	1453.9	-3510.9	1197.9
22.4342	1442.0	1452.8	-3504.8	1196.8
22.4539	1441.0	1451.7	-3504.7	1195.7
22.4736	1420.0	1450.6	-3524.6	1194.6
22.4933	1519.0	1449.5	-3424.5	1193.5
22.5130	1491.0	1448.3	-3451.3	1192.3
22.5327	1371.0	1447.2	-3570.2	1191.2
22.5524	1421.0	1446.1	-3519.1	1190.1
22.5721	1427.0	1445.0	-3512.0	1189.0
22.5918	1478.0	1443.9	-3459.9	1187.9
22.6115	1418.0	1442.8	-3518.8	1186.8
22.6312	1486.0	1441.7	-3449.7	1185.7
22.6509	1529.0	1440.6	-3405.6	1184.6
22.6706	1446.0	1439.5	-3487.5	1183.5
22.6903	1481.0	1438.4	-3451.4	1182.4
22.7100	1442.0	1437.3	-3489.3	1181.3
22.7298	1428.0	1436.2	-3502.2	1180.2
22.7495	1442.0	1435.1	-3487.1	1179.1
22.7692	1446.0	1434.0	-3482.0	1178.0
22.7889	1426.0	1432.9	-3500.9	1176.9
22.8086	1400.0	1431.8	-3525.8	1175.8
22.8283	1392.0	1430.7	-3532.7	1174.7
22.8480	1442.0	1429.5	-3481.5	1173.5
22.8677	1419.0	1428.4	-3503.4	1172.4
22.8874	1484.0	1427.3	-3437.3	1171.3
22.9071	1395.0	1426.2	-3525.2	1170.2
22.9268	1333.0	1425.1	-3586.1	1169.1
22.9465	1405.0	1424.3	-3513.3	1168.3
22.9662	1447.0	1423.5	-3470.5	1167.5
22.9859	1433.0	1422.7	-3483.7	1166.7
23.0056	1425.0	1422.0	-3491.0	1166.0
23.0253	1469.0	1421.2	-3446.2	1165.2
23.0450	1407.0	1420.4	-3507.4	1164.4
23.0647	1422.0	1419.6	-3491.6	1163.6
23.0845	1444.0	1418.8	-3468.8	1162.8
23.1042	1377.0	1418.0	-3535.0	1162.0
23.1239	1389.0	1417.2	-3522.2	1161.2
23.1436	1402.0	1416.4	-3508.4	1160.4
23.1633	1402.0	1415.6	-3507.6	1159.6
23.1830	1391.0	1414.8	-3517.8	1158.8
23.2027	1383.0	1414.0	-3525.0	1158.0
23.2224	1413.0	1413.2	-3494.2	1157.2
23.2421	1388.0	1412.4	-3518.4	1156.4
23.2618	1473.0	1411.6	-3432.6	1155.6
23.2815	1411.0	1410.8	-3493.8	1154.8
23.3012	1444.0	1410.1	-3460.1	1154.1
23.3209	1456.0	1409.3	-3447.3	1153.3
23.3406	1382.0	1408.5	-3520.5	1152.5
23.3603	1428.0	1407.7	-3473.7	1151.7
23.3800	1306.0	1406.9	-3594.9	1150.9
23.3997	1451.0	1406.1	-3449.1	1150.1
23.4194	1408.0	1405.3	-3491.3	1149.3
23.4392	1437.0	1404.5	-3461.5	1148.5
23.4589	1394.0	1403.7	-3503.7	1147.7
23.4786	1434.0	1402.9	-3462.9	1146.9
23.4983	1357.0	1402.1	-3539.1	1146.1
23.5180	1375.0	1401.3	-3520.3	1145.3
23.5377	1417.0	1400.5	-3477.5	1144.5
23.5574	1316.0	1399.7	-3577.7	1143.7
23.5771	1405.0	1398.9	-3487.9	1142.9
23.5968	1436.0	1398.2	-3456.2	1142.1
23.6165	1473.0	1397.4	-3418.4	1141.4
23.6362	1408.0	1396.6	-3482.6	1140.6
23.6559	1384.0	1395.8	-3505.8	1139.8
23.6756	1414.0	1395.0	-3475.0	1139.0
23.6953	1431.0	1394.2	-3457.2	1138.2
23.7150	1381.0	1393.4	-3506.4	1137.4
23.7347	1372.0	1392.6	-3514.6	1136.6
23.7544	1366.0	1391.8	-3519.8	1135.8
23.7741	1397.0	1391.0	-3488.0	1135.0
23.7938	1368.0	1390.2	-3516.2	1134.2
23.8136	1395.0	1389.4	-3488.4	1133.4
23.8333	1385.0	1388.6	-3497.6	1132.6
23.8530	1409.0	1387.8	-3472.8	1131.8
23.8727	1335.0	1387.0	-3546.0	1131.0
23.8924	1354.0	1386.2	-3526.2	1130.2
23.9121	1399.0	1385.5	-3480.5	1129.5
23.9318	1462.0	1384.7	-3416.7	1128.7
23.9515	1393.0	1383.9	-3484.9	1127.9
23.9712	1326.0	1387.1	-3555.1	1127.1
23.9909	1399.0	1386.6	-3481.6	1126.3
24.0106	1372.0	1386.1	-3508.1	1125.5
24.0303	1395.0	1385.7	-3484.7	1124.7
24.0500	1345.0	1385.3	-3534.3	1123.9
24.0697	1357.0	1384.9	-3521.9	1123.1
24.0894	1393.0	1384.6	-3485.6	1122.3
24.1091	1371.0	1384.3	-3507.3	1121.5
24.1288	1384.0	1384.1	-3494.1	1120.7
24.1485	1438.0	1384.0	-3440.0	1119.9
24.1683	1403.0	1384.0	-3475.0	1119.1
24.1880	1398.0	1384.2	-3480.2	1118.3
24.2077	1414.0	1384.4	-3464.4	1117.6
24.2274	1446.0	1384.9	-3432.9	1116.8
24.2471	1340.0	1385.5	-3539.5	1116.0
24.2668	1329.0	1386.5	-3551.5	1115.2
24.2865	1374.0	1387.8	-3507.8	1114.4
24.3062	1402.0	1389.6	-3481.6	1113.6
24.3259	1362.0	1392.0	-3524.0	1112.8
24.3456	1349.0	1395.2	-3540.2	1112.0
24.3653	1366.0	1399.5	-3527.5	1111.2
24.3850	1400.0	1405.4	-3499.4	1110.4
24.4047	1366.0	1413.5	-3541.5	1109.6
24.4244	1358.0	1425.1	-3561.1	1108.8
24.4441	1449.0	1442.4	-3487.4	1108.0
24.4638	1417.0	1471.7	-3548.7	1107.2
24.4835	1584.0	1532.1	-3442.1	1106.5
24.5032	1704.0	1671.4	-3461.4	1105.7
24.5230	2059.0	1967.7	-3402.7	1104.9
24.5427	2713.0	2458.1	-3239.1	1104.1
24.5624	3505.0	3000.5	-2989.5	1103.3
24.5821	3540.0	3148.3	-3102.3	1102.5
24.6018	3062.0	2720.9	-3152.9	1101.7
24.6215	2375.0	2168.8	-3287.8	1100.9
24.6412	1799.0	1779.8	-3474.8	1100.1
24.6609	1537.0	1576.3	-3533.3	1099.3
24.6806	1503.0	1485.7	-3476.7	1098.5
24.7003	1406.0	1444.0	-3532.0	1097.7
24.7200	1418.0	1420.7	-3496.7	1096.9
24.7397	1354.0	1405.3	-3545.3	1096.1
24.7594	1304.0	1394.1	-3584.1	1095.3
24.7791	1380.0	1385.7	-3499.7	1094.6
24.7988	1333.0	1379.2	-3540.2	1093.8
24.8185	1297.0	1373.9	-3570.9	1093.0
24.8382	1360.0	1369.3	-3503.3	1091.9
24.8579	1352.0	1365.5	-3507.5	1090.9
24.8777	1377.0	1362.1	-3479.1	1089.8
24.8974	1335.0	1359.1	-3518.1	1088.8
24.9171	1331.0	1356.5	-3519.5	1087.8
24.9368	1331.0	1354.1	-3517.1	1086.7
24.9565	1378.0	1352.0	-3468.0	1085.7
24.9762	1355.0	1349.9	-3488.9	1084.6
24.9959	1357.0	1348.0	-3485.0	1083.6
25.0156	1359.0	1346.3	-3481.3	1082.5
25.0353	1344.0	1344.6	-3494.6	1081.5
25.0550	1335.0	1343.0	-3502.0	1080.5
25.0747	1328.0	1341.4	-3507.4	1079.4
25.0944	1292.0	1339.9	-3541.9	1078.4
25.1141	1319.0	1338.5	-3513.5	1077.3
25.1338	1286.0	1337.1	-3545.1	1076.3
25.1535	1355.0	1335.7	-3474.7	1075.3
25.1732	1299.0	1334.4	-3529.4	1074.2
25.1929	1289.0	1329.2	-3534.2	1073.2
25.2126	1363.0	1328.1	-3459.1	1072.1
25.2324	1268.0	1327.1	-3553.1	1071.1
25.2521	1361.0	1326.1	-3459.1	1070.1
25.2718	1364.0	1325.0	-3455.0	1069.0
25.2915	1302.0	1324.0	-3516.0	1068.0
25.3112	1333.0	1322.9	-3483.9	1066.9
25.3309	1327.0	1321.9	-3488.9	1065.9
25.3506	1334.0	1320.9	-3480.9	1064.9
25.3703	1334.0	1319.8	-3479.8	1063.8
25.3900	1329.0	1318.8	-3483.8	1062.8
25.4097	1288.0	1317.7	-3523.7	1061.7
25.4294	1271.0	1316.7	-3539.7	1060.7
25.4491	1314.0	1315.6	-3495.6	1059.6
25.4688	1368.0	1314.6	-3440.6	1058.6
25.4885	1269.0	1313.6	-3538.6	1057.6
25.5082	1295.0	1312.5	-3511.5	1056.5
25.5279	1340.0	1311.5	-3465.5	1055.5
25.5476	1324.0	1310.4	-3480.4	1054.4
25.5673	1293.0	1309.4	-3510.4	1053.4
25.5871	1308.0	1308.4	-3494.4	1052.4
25.6068	1320.0	1307.3	-3481.3	1051.3
25.6265	1234.0	1306.3	-3566.3	1050.3
25.6462	1297.0	1305.2	-3502.2	1049.2
25.6659	1285.0	1304.2	-3513.2	1048.2
25.6856	1313.0	1303.2	-3484.2	1047.2
25.7053	1314.0	1302.1	-3482.1	1046.1
25.7250	1345.0	1301.1	-3450.1	1045.1
25.7447	1328.0	1300.0	-3466.0	1044.0
25.7644	1288.0	1299.0	-3505.0	1043.0
25.7841	1279.0	1297.9	-3512.9	1041.9
25.8038	1280.0	1296.9	-3510.9	1040.9
25.8235	1286.0	1295.9	-3503.9	1039.9
25.8432	1301.0	1294.8	-3487.8	1038.8
25.8629	1305.0	1293.8	-3482.8	1037.8
25.8826	1279.0	1292.7	-3507.7	1036.7
25.9023	1246.0	1291.7	-3539.7	1035.7
25.9220	1401.0	1290.7	-3383.7	1034.7
25.9417	1313.0	1289.6	-3470.6	1033.6
25.9615	1288.0	1288.6	-3494.6	1032.6
25.9812	1319.0	1287.5	-3462.5	1031.5
26.0009	1257.0	1286.5	-3523.5	1030.5
26.0206	1234.0	1285.5	-3545.5	1029.5
26.0403	1269.0	1284.4	-3509.4	1028.4
26.0600	1324.0	1283.4	-3453.4	1027.4
26.0797	1203.0	1282.3	-3573.3	1026.3
26.0994	1241.0	1281.9	-3534.9	1025.9
26.1191	1262.0	1281.4	-3513.4	1025.4
26.1388	1254.0	1281.0	-3521.0	1025.0
26.1585	1269.0	1280.6	-3505.6	1024.6
26.1782	1346.0	1280.1	-3428.1	1024.1
26.1979	1384.0	1279.7	-3389.7	1023.7
26.2176	1254.0	1279.2	-3519.2	1023.2
26.2373	1258.0	1278.8	-3514.8	1022.8
26.2570	1342.0	1278.3	-3430.3	1022.3
26.2767	1287.0	1277.9	-3484.9	1021.9
26.2964	1263.0	1277.5	-3508.5	1021.5
26.3162	1336.0	1277.0	-3435.0	1021.0
26.3359	1245.0	1276.6	-3525.6	1020.6
26.3556	1327.0	1276.1	-3443.1	1020.1
26.3753	1269.0	1275.7	-3500.7	1019.7
26.3950	1284.0	1275.2	-3485.2	1019.2
26.4147	1265.0	1274.8	-3503.8	1018.8
26.4344	1317.0	1274.3	-3451.3	1018.3
26.4541	1258.0	1273.9	-3509.9	1017.9
26.4738	1291.0	1273.5	-3476.5	1017.5
26.4935	1261.0	1273.0	-3506.0	1017.0
26.5132	1220.0	1272.6	-3546.6	1016.6
26.5329	1256.0	1272.1	-3510.1	1016.1
26.5526	1239.0	1271.7	-3526.7	1015.7
26.5723	1313.0	1271.2	-3452.2	1015.2
26.5920	1257.0	1270.8	-3507.8	1014.8
26.6117	1259.0	1270.4	-3505.4	1014.4
26.6314	1275.0	1269.9	-3488.9	1013.9
26.6511	1188.0	1269.5	-3575.5	1013.5
26.6709	1298.0	1269.0	-3465.0	1013.0
26.6906	1195.0	1268.6	-3567.6	1012.6
26.7103	1232.0	1268.1	-3530.1	1012.1
26.7300	1279.0	1267.7	-3482.7	1011.7
26.7497	1246.0	1267.3	-3515.3	1011.3
26.7694	1245.0	1266.8	-3515.8	1010.8
26.7891	1231.0	1266.4	-3529.4	1010.4
26.8088	1275.0	1265.9	-3484.9	1009.9
26.8285	1285.0	1265.5	-3474.5	1009.5
26.8482	1261.0	1265.0	-3498.0	1009.0
26.8679	1294.0	1264.6	-3464.6	1008.6
26.8876	1266.0	1264.1	-3492.1	1008.1
26.9073	1288.0	1263.7	-3469.7	1007.7
26.9270	1259.0	1263.3	-3498.3	1007.3
26.9467	1283.0	1262.8	-3473.8	1006.8
26.9664	1260.0	1262.4	-3496.4	1006.4
26.9861	1294.0	1261.9	-3461.9	1005.9
27.0058	1392.0	1261.5	-3363.5	1005.5
27.0256	1283.0	1261.0	-3472.0	1005.0
27.0453	1291.0	1260.6	-3463.6	1004.6
27.0650	1287.0	1260.2	-3467.2	1004.2
27.0847	1331.0	1259.7	-3422.7	1003.7
27.1044	1279.0	1259.3	-3474.3	1003.3
27.1241	1317.0	1258.8	-3435.8	1002.8
27.1438	1236.0	1258.4	-3516.4	1002.4
27.1635	1221.0	1257.9	-3530.9	1001.9
27.1832	1222.0	1257.5	-3529.5	1001.5
27.2029	1322.0	1257.1	-3429.1	1001.1
27.2226	1260.0	1256.6	-3490.6	1000.6
27.2423	1278.0	1256.2	-3472.2	1000.2
27.2620	1300.0	1255.7	-3449.7	999.7
27.2817	1260.0	1255.3	-3489.3	999.3
27.3014	1251.0	1254.8	-3497.8	998.8
27.3211	1217.0	1254.4	-3531.4	998.4
27.3408	1296.0	1254.0	-3452.0	998.0
27.3605	1211.0	1253.5	-3536.5	997.5
27.3803	1264.0	1253.1	-3483.1	997.1
27.4000	1249.0	1252.6	-3497.6	996.6
27.4197	1244.0	1252.2	-3502.2	996.2
27.4394	1246.0	1251.7	-3499.7	995.7
27.4591	1217.0	1251.3	-3528.3	995.3
27.4788	1221.0	1250.8	-3523.8	994.8
27.4985	1293.0	1250.4	-3451.4	994.4
27.5182	1273.0	1250.0	-3471.0	994.0
27.5379	1200.0	1249.5	-3543.5	993.5
27.5576	1251.0	1249.1	-3492.1	993.1
27.5773	1276.0	1248.6	-3466.6	992.6
27.5970	1262.0	1248.2	-3480.2	992.2
27.6167	1278.0	1247.7	-3463.7	991.7
27.6364	1293.0	1247.3	-3448.3	991.3
27.6561	1287.0	1246.9	-3453.9	990.9
27.6758	1251.0	1246.4	-3489.4	990.4
27.6955	1202.0	1246.0	-3538.0	990.0
27.7152	1218.0	1245.5	-3521.5	989.5
27.7350	1223.0	1245.1	-3516.1	989.1
27.7547	1231.0	1244.6	-3507.6	988.6
27.7744	1224.0	1244.2	-3514.2	988.2
27.7941	1224.0	1243.8	-3513.8	987.8
27.8138	1238.0	1243.3	-3499.3	987.3
27.8335	1175.0	1242.9	-3561.9	986.9
27.8532	1236.0	1241.1	-3499.1	985.1
27.8729	1287.0	1239.3	-3446.3	983.3
27.8926	1257.0	1237.5	-3474.5	981.5
27.9123	1177.0	1235.7	-3552.7	979.7
27.9320	1168.0	1233.9	-3559.9	977.9
27.9517	1203.0	1232.1	-3523.1	976.1
27.9714	1232.0	1230.3	-3492.3	974.3
27.9911	1144.0	1228.6	-3578.6	972.6
28.0108	1209.0	1226.8	-3511.8	970.8
28.0305	1276.0	1225.0	-3443.0	969.0
28.0502	1291.0	1223.2	-3426.2	967.2
28.0699	1321.0	1221.4	-3394.4	965.4
28.0896	1217.0	1219.6	-3496.6	963.6
28.1094	1265.0	1217.8	-3446.8	961.8
28.1291	1195.0	1216.0	-3515.0	960.0
28.1488	1225.0	1214.2	-3483.2	958.2
28.1685	1188.0	1212.4	-3518.4	956.4
28.1882	1235.0	1210.7	-3469.7	954.7
28.2079	1239.0	1208.9	-3463.9	952.9
28.2276	1220.0	1207.1	-3481.1	951.1
28.2473	1140.0	1205.3	-3559.3	949.3
28.2670	1151.0	1205.0	-3548.0	949.0
28.2867	1167.0	1204.8	-3531.8	948.8
28.3064	1184.0	1204.5	-3514.5	948.5
28.3261	1235.0	1207.3	-3466.3	948.2
28.3458	1194.0	1207.2	-3507.2	948.0
28.3655	1177.0	1207.2	-3524.2	947.7
28.3852	1184.0	1207.2	-3517.2	947.5
28.4049	1140.0	1207.2	-3561.2	947.2
28.4246	1218.0	1207.2	-3483.2	946.9
28.4443	1240.0	1207.3	-3461.3	946.7
28.4641	1187.0	1207.4	-3514.4	946.4
28.4838	1203.0	1207.6	-3498.6	946.1
28.5035	1197.0	1207.8	-3504.8	945.9
28.5232	1208.0	1208.1	-3494.1	945.6
28.5429	1245.0	1208.5	-3457.5	945.4
28.5626	1231.0	1209.0	-3472.0	945.1
28.5823	1232.0	1209.6	-3471.6	944.8
28.6020	1218.0	1210.3	-3486.3	944.6
28.6217	1244.0	1211.3	-3461.3	944.3
28.6414	1226.0	1212.4	-3480.4	944.0
28.6611	1264.0	1213.9	-3443.9	943.8
28.6808	1219.0	1215.8	-3490.8	943.5
28.7005	1166.0	1218.1	-3546.1	943.3
28.7202	1185.0	1221.2	-3530.2	943.0
28.7399	1174.0	1225.2	-3545.2	942.7
28.7596	1161.0	1230.5	-3563.5	942.5
28.7793	1222.0	1237.8	-3509.8	942.2
28.7990	1282.0	1248.1	-3460.1	942.0
28.8188	1249.0	1264.0	-3509.0	941.7
28.8385	1393.0	1292.7	-3393.7	941.4
28.8582	1427.0	1354.7	-3421.7	941.2
28.8779	1641.0	1493.4	-3346.4	940.9
28.8976	1958.0	1760.9	-3296.9	940.6
28.9173	2343.0	2154.7	-3305.7	940.4
28.9370	2646.0	2508.5	-3356.5	940.1
28.9567	2702.0	2493.4	-3285.4	939.9
28.9764	2226.0	2126.7	-3394.7	939.6
28.9961	1802.0	1737.9	-3429.9	939.3
29.0158	1489.0	1479.2	-3484.2	939.1
29.0355	1281.0	1346.6	-3559.6	938.8
29.0552	1255.0	1287.3	-3526.3	938.6
29.0749	1191.0	1259.3	-3562.3	938.3
29.0946	1165.0	1243.4	-3572.4	938.0
29.1143	1298.0	1232.8	-3428.8	937.8
29.1340	1206.0	1225.1	-3513.1	937.5
29.1537	1183.0	1219.4	-3530.4	937.2
29.1735	1162.0	1214.9	-3546.9	937.0
29.1932	1182.0	1211.4	-3523.4	936.7
29.2129	1214.0	1208.5	-3488.5	936.5
29.2326	1212.0	1206.2	-3488.2	936.2
29.2523	1237.0	1204.2	-3461.2	935.9
29.2720	1303.0	1202.5	-3393.5	935.7
29.2917	1234.0	1201.1	-3461.1	935.4
29.3114	1216.0	1199.8	-3477.8	935.1
29.3311	1125.0	1198.7	-3567.7	934.9
29.3508	1129.0	1197.7	-3562.7	934.6
29.3705	1204.0	1196.8	-3486.8	934.4
29.3902	1147.0	1196.0	-3543.0	934.1
29.4099	1131.0	1195.2	-3558.2	933.8
29.4296	1229.0	1194.6	-3459.6	933.6
29.4493	1246.0	1193.9	-3441.9	933.3
29.4690	1158.0	1193.3	-3529.3	933.1
29.4887	1141.0	1192.7	-3545.7	932.8
29.5084	1231.0	1192.2	-3455.2	932.5
29.5282	1202.0	1191.7	-3483.7	932.3
29.5479	1206.0	1191.2	-3479.2	932.0
29.5676	1191.0	1190.8	-3493.8	931.7
29.5873	1231.0	1187.5	-3450.5	931.5
29.6070	1092.0	1187.2	-3589.2	931.2
29.6267	1177.0	1187.0	-3504.0	931.0
29.6464	1197.0	1186.7	-3483.7	930.7
29.6661	1193.0	1186.4	-3487.4	930.4
29.6858	1179.0	1186.2	-3501.2	930.2
29.7055	1240.0	1185.9	-3439.9	929.9
29.7252	1171.0	1185.6	-3508.6	929.6
29.7449	1164.0	1185.4	-3515.4	929.4
29.7646	1179.0	1185.1	-3500.1	929.1
29.7843	1159.0	1184.9	-3519.9	928.9
29.8040	1156.0	1184.6	-3522.6	928.6
29.8237	1188.0	1184.3	-3490.3	928.3
29.8434	1169.0	1184.1	-3509.1	928.1
29.8631	1154.0	1183.8	-3523.8	927.8
29.8828	1138.0	1183.6	-3539.6	927.6
29.9026	1161.0	1183.3	-3516.3	927.3
29.9223	1167.0	1183.0	-3510.0	927.0
29.9420	1155.0	1182.8	-3521.8	926.8
29.9617	1181.0	1182.5	-3495.5	926.5
29.9814	1200.0	1182.2	-3476.2	926.2
30.0011	1232.0	1182.0	-3444.0	926.0
30.0208	1221.0	1181.7	-3454.7	925.7
30.0405	1263.0	1181.5	-3412.5	925.5
30.0602	1255.0	1181.2	-3420.2	925.2
30.0799	1218.0	1180.9	-3456.9	924.9
30.0996	1168.0	1180.7	-3506.7	924.7
30.1193	1209.0	1180.4	-3465.4	924.4
30.1390	1205.0	1180.1	-3469.1	924.1
30.1587	1194.0	1179.9	-3479.9	923.9
30.1784	1236.0	1179.6	-3437.6	923.6
30.1981	1168.0	1179.4	-3505.4	923.4
30.2178	1098.0	1179.1	-3575.1	923.1
30.2375	1149.0	1178.8	-3523.8	922.8
30.2573	1186.0	1178.6	-3486.6	922.6
30.2770	1179.0	1178.3	-3493.3	922.3
30.2967	1123.0	1178.1	-3549.1	922.1
30.3164	1195.0	1177.8	-3476.8	921.8
30.3361	1142.0	1177.5	-3529.5	921.5
30.3558	1185.0	1177.3	-3486.3	921.3
30.3755	1173.0	1177.0	-3498.0	921.0
30.3952	1165.0	1176.7	-3505.7	920.7
30.4149	1163.0	1176.5	-3507.5	920.5
30.4346	1173.0	1176.2	-3497.2	920.2
30.4543	1119.0	1176.0	-3551.0	920.0
30.4740	1113.0	1175.7	-3556.7	919.7
30.4937	1225.0	1175.4	-3444.4	919.4
30.5134	1169.0	1175.2	-3500.2	919.2
30.5331	1192.0	1174.9	-3476.9	918.9
30.5528	1167.0	1174.6	-3501.6	918.6
30.5725	1132.0	1174.4	-3536.4	918.4
30.5922	1080.0	1174.1	-3588.1	918.1
30.6120	1173.0	1172.3	-3493.3	916.3
30.6317	1139.0	1170.5	-3525.5	914.5
30.6514	1188.0	1168.7	-3474.7	912.7
30.6711	1099.0	1166.9	-3561.9	910.9
30.6908	1191.0	1165.0	-3468.0	909.0
30.7105	1195.0	1163.2	-3462.2	907.2
30.7302	1184.0	1161.4	-3471.4	905.4
30.7499	1156.0	1159.6	-3497.6	903.6
30.7696	1159.0	1157.8	-3492.8	901.8
30.7893	1192.0	1156.0	-3458.0	900.0
30.8090	1124.0	1154.2	-3524.2	898.2
30.8287	1171.0	1152.4	-3475.4	896.4
30.8484	1156.0	1150.5	-3488.5	894.5
30.8681	1147.0	1148.7	-3495.7	892.7
30.8878	1136.0	1146.9	-3504.9	890.9
30.9075	1162.0	1145.1	-3477.1	889.1
30.9272	1188.0	1143.3	-3449.3	887.3
30.9469	1087.0	1141.5	-3548.5	885.5
30.9667	1168.0	1139.6	-3465.6	883.6
30.9864	1119.0	1137.8	-3512.8	881.8
31.0061	1112.0	1136.0	-3518.0	880.0
31.0258	1211.0	1134.2	-3417.2	878.2
31.0455	1216.0	1132.4	-3410.4	876.4
31.0652	1196.0	1130.6	-3428.6	874.6
31.0849	1099.0	1128.8	-3523.8	872.8
31.1046	1228.0	1127.0	-3393.0	870.9
31.1243	1140.0	1125.1	-3479.1	869.1
31.1440	1208.0	1123.3	-3409.3	867.3
31.1637	1171.0	1121.5	-3444.5	865.5
31.1834	1175.0	1119.7	-3438.7	863.7
31.2031	1092.0	1117.9	-3519.9	861.9
31.2228	1112.0	1116.1	-3498.1	860.1
31.2425	1132.0	1114.3	-3476.3	858.3
31.2622	1167.0	1112.4	-3439.4	856.4
31.2819	1100.0	1110.6	-3504.6	854.6
31.3016	1153.0	1108.8	-3449.8	852.8
31.3214	1146.0	1107.0	-3455.0	851.0
31.3411	1126.0	1105.2	-3473.2	849.2
31.3608	1164.0	1103.4	-3433.4	847.4
31.3805	1128.0	1101.5	-3467.5	845.5
31.4002	1181.0	1099.7	-3412.7	843.7
31.4199	1152.0	1097.9	-3439.9	841.9
31.4396	1147.0	1096.1	-3443.1	840.1
31.4593	1132.0	1094.3	-3456.3	838.3
31.4790	1114.0	1120.3	-3500.3	836.5
31.4987	1072.0	1120.3	-3542.3	834.7
31.5184	1154.0	1122.0	-3462.0	834.4
31.5381	1144.0	1123.9	-3473.9	834.1
31.5578	1191.0	1126.0	-3429.0	833.8
31.5775	1109.0	1128.4	-3513.4	833.5
31.5972	1140.0	1131.1	-3485.1	833.2
31.6169	1173.0	1134.2	-3455.2	832.9
31.6366	1167.0	1137.7	-3464.7	832.6
31.6563	1159.0	1141.7	-3476.7	832.3
31.6761	1114.0	1146.3	-3526.3	832.0
31.6958	1158.0	1151.5	-3487.5	831.7
31.7155	1142.0	1157.6	-3509.6	831.4
31.7352	1160.0	1164.8	-3498.8	831.1
31.7549	1126.0	1173.1	-3541.1	830.8
31.7746	1173.0	1183.0	-3504.0	830.5
31.7943	1232.0	1194.7	-3456.7	830.2
31.8140	1275.0	1208.9	-3427.9	829.9
31.8337	1196.0	1226.1	-3524.1	829.6
31.8534	1217.0	1247.3	-3524.3	829.3
31.8731	1164.0	1273.8	-3603.8	829.0
31.8928	1255.0	1307.4	-3546.4	828.7
31.9125	1323.0	1350.9	-3521.9	828.4
31.9322	1398.0	1408.5	-3504.5	828.1
31.9519	1420.0	1487.0	-3561.0	827.8
31.9716	1623.0	1599.6	-3470.6	827.5
31.9913	1881.0	1780.4	-3393.4	827.2
32.0110	2265.0	2129.3	-3358.3	826.9
32.0307	3083.0	2899.5	-3310.5	826.6
32.0505	4686.0	4545.2	-3353.2	826.3
32.0702	7498.0	7425.9	-3421.9	826.0
32.0899	11093.0	11160.5	-3561.5	825.7
32.1096	13976.0	13690.0	-3208.0	825.4
32.1293	12977.0	12449.1	-2966.1	825.1
32.1490	8636.0	8822.1	-3680.1	824.8
32.1687	5268.0	5496.2	-3722.2	824.5
32.1884	3084.0	3401.9	-3811.9	824.2
32.2081	2213.0	2354.7	-3635.7	824.0
32.2278	1660.0	1883.0	-3717.0	823.7
32.2475	1462.0	1654.4	-3686.4	823.4
32.2672	1351.0	1520.9	-3663.9	823.1
32.2869	1361.0	1430.8	-3563.8	822.8
32.3066	1215.0	1365.5	-3644.5	822.5
32.3263	1192.0	1316.5	-3618.5	822.2
32.3460	1246.0	1278.9	-3526.9	821.9
32.3657	1156.0	1249.3	-3587.3	821.6
32.3854	1209.0	1225.6	-3510.6	821.3
32.4052	1143.0	1206.3	-3557.3	821.0
32.4249	1162.0	1190.4	-3522.4	820.7
32.4446	1123.0	1177.2	-3548.2	820.4
32.4643	1112.0	1166.1	-3548.1	820.1
32.4840	1189.0	1156.6	-3461.6	819.8
32.5037	1159.0	1148.4	-3483.4	819.5
32.5234	1124.0	1141.4	-3511.4	819.2
32.5431	1195.0	1135.2	-3434.2	818.9
32.5628	1127.0	1129.8	-3496.8	818.6
32.5825	1140.0	1125.0	-3479.0	818.3
32.6022	1141.0	1120.7	-3473.7	818.0
32.6219	1126.0	1116.9	-3484.9	817.7
32.6416	1142.0	1113.5	-3465.5	817.4
32.6613	1163.0	1110.4	-3441.4	817.1
32.6810	1163.0	1107.5	-3438.5	816.8
32.7007	1127.0	1105.0	-3472.0	816.5
32.7204	1164.0	1102.6	-3432.6	816.2
32.7401	1185.0	1100.4	-3409.4	815.9
32.7599	1157.0	1098.4	-3435.4	815.6
32.7796	1194.0	1071.3	-3371.3	815.3
32.7993	1098.0	1092.3	-3488.3	815.0
32.8190	1146.0	1093.4	-3441.4	814.7
32.8387	1106.0	1094.6	-3482.6	814.4
32.8584	1155.0	1096.0	-3435.0	814.1
32.8781	1120.0	1097.5	-3471.5	813.8
32.8978	1092.0	1099.3	-3501.3	813.5
32.9175	1149.0	1101.3	-3446.3	813.2
32.9372	1134.0	1103.6	-3463.6	812.9
32.9569	1083.0	1106.2	-3517.2	812.6
32.9766	1143.0	1109.2	-3460.2	812.3
32.9963	1106.0	1112.6	-3500.6	812.0
33.0160	1117.0	1116.6	-3493.6	811.8
33.0357	1111.0	1121.1	-3504.1	811.5
33.0554	1121.0	1126.5	-3499.5	811.2
33.0751	1171.0	1132.8	-3455.8	810.9
33.0948	1124.0	1140.3	-3510.3	810.6
33.1146	1177.0	1149.2	-3466.2	810.3
33.1343	1167.0	1160.0	-3487.0	810.0
33.1540	1131.0	1173.0	-3536.0	809.7
33.1737	1163.0	1189.2	-3520.2	809.4
33.1934	1174.0	1209.3	-3529.3	809.1
33.2131	1236.0	1234.9	-3492.9	808.8
33.2328	1184.0	1268.0	-3578.0	808.5
33.2525	1245.0	1311.8	-3560.8	808.2
33.2722	1286.0	1371.5	-3579.5	807.9
33.2919	1385.0	1457.5	-3566.5	807.6
33.3116	1558.0	1596.4	-3532.4	807.3
33.3313	1868.0	1866.1	-3492.1	807.0
33.3510	2393.0	2459.5	-3560.5	806.7
33.3707	3516.0	3705.7	-3683.7	806.4
33.3904	5585.0	5872.2	-3781.2	806.1
33.4101	8337.0	8663.7	-3820.7	805.8
33.4298	10302.0	10565.9	-3757.9	805.5
33.4495	9391.0	9684.8	-3787.8	805.2
33.4693	6815.0	6976.5	-3655.5	804.9
33.4890	4464.0	4466.6	-3496.6	804.6
33.5087	3109.0	2861.9	-3246.9	804.3
33.5284	2238.0	2048.1	-3304.1	804.0
33.5481	1782.0	1678.8	-3390.8	803.7
33.5678	1625.0	1500.6	-3369.6	803.4
33.5875	1433.0	1397.6	-3458.6	803.1
33.6072	1346.0	1328.4	-3476.4	802.8
33.6269	1255.0	1278.4	-3517.4	802.5
33.6466	1255.0	1240.8	-3479.8	802.2
33.6663	1199.0	1211.9	-3506.9	801.9
33.6860	1219.0	1189.1	-3464.1	801.6
33.7057	1137.0	1170.9	-3527.9	801.3
33.7254	1102.0	1156.1	-3548.1	801.0
33.7451	1067.0	1143.9	-3570.9	800.7
33.7648	1152.0	1134.6	-3476.6	801.3
33.7845	1127.0	1126.9	-3493.9	801.9
33.8042	1120.0	1120.5	-3494.5	802.5
33.8239	1169.0	1115.0	-3440.0	803.1
33.8437	1163.0	1110.4	-3441.4	803.7
33.8634	1125.0	1106.5	-3475.5	804.3
33.8831	1144.0	1103.2	-3453.2	804.9
33.9028	1057.0	1100.3	-3537.3	805.5
33.9225	1092.0	1097.9	-3499.9	806.1
33.9422	1117.0	1095.8	-3472.8	806.7
33.9619	1047.0	1094.0	-3541.0	807.3
33.9816	1111.0	1092.4	-3475.4	807.9
34.0013	1122.0	1091.1	-3463.1	808.5
34.0210	1134.0	1090.0	-3450.0	809.1
34.0407	1092.0	1089.0	-3491.0	809.7
34.0604	1118.0	1088.1	-3464.1	810.3
34.0801	1129.0	1087.4	-3452.4	810.9
34.0998	1084.0	1067.5	-3477.5	811.5
34.1195	1101.0	1068.1	-3461.1	812.1
34.1392	1026.0	1068.7	-3536.7	812.7
34.1589	1107.0	1069.3	-3456.3	813.3
34.1786	1074.0	1069.9	-3489.9	813.9
34.1984	1058.0	1070.5	-3506.5	814.5
34.2181	1115.0	1071.1	-3450.1	815.1
34.2378	1024.0	1071.7	-3541.7	815.7
34.2575	1087.0	1072.3	-3479.3	816.3
34.2772	1131.0	1072.9	-3435.9	816.9
34.2969	1109.0	1073.5	-3458.5	817.5
34.3166	1058.0	1074.1	-3510.1	818.1
34.3363	1099.0	1074.7	-3469.7	818.7
34.3560	1127.0	1075.3	-3442.3	819.3
34.3757	1095.0	1075.9	-3474.9	819.9
34.3954	1101.0	1076.5	-3469.5	820.5
34.4151	1095.0	1077.1	-3476.1	821.1
34.4348	1060.0	1077.7	-3511.7	821.7
34.4545	1117.0	1078.3	-3455.3	822.3
34.4742	1075.0	1078.9	-3497.9	822.9
34.4939	1079.0	1079.5	-3494.5	823.5
34.5136	1103.0	1080.1	-3471.1	824.1
34.5333	1141.0	1080.6	-3433.6	824.6
34.5531	1112.0	1081.2	-3463.2	825.2
34.5728	1096.0	1081.8	-3479.8	825.8
34.5925	1107.0	1082.4	-3469.4	826.4
34.6122	1097.0	1083.0	-3480.0	827.0
34.6319	1151.0	1083.6	-3426.6	827.6
34.6516	1063.0	1084.2	-3515.2	828.2
34.6713	1135.0	1084.8	-3443.8	828.8
34.6910	1086.0	1085.4	-3493.4	829.4
34.7107	1041.0	1086.0	-3539.0	830.0
34.7304	1133.0	1086.6	-3447.6	830.6
34.7501	1099.0	1087.2	-3482.2	831.2
34.7698	1091.0	1087.8	-3490.8	831.8
34.7895	1105.0	1088.4	-3477.4	832.4
34.8092	1078.0	1089.0	-3505.0	833.0
34.8289	1055.0	1089.6	-3528.6	833.6
34.8486	1066.0	1090.2	-3518.2	834.2
34.8683	1112.0	1090.8	-3472.8	834.8
34.8880	1082.0	1091.4	-3503.4	835.4
34.9078	1122.0	1092.0	-3464.0	836.0
34.9275	1073.0	1092.6	-3513.6	836.6
34.9472	1103.0	1093.2	-3484.2	837.2
34.9669	1105.0	1093.8	-3482.8	837.8
34.9866	1078.0	1094.4	-3510.4	838.4
35.0063	1091.0	1095.0	-3498.0	839.0
35.0260	1046.0	1095.6	-3543.6	839.6
35.0457	1036.0	1096.2	-3554.2	840.2
35.0654	1054.0	1096.8	-3536.8	840.8
35.0851	1124.0	1097.4	-3467.4	841.4
35.1048	1111.0	1098.0	-3481.0	842.0
35.1245	1097.0	1098.6	-3495.6	842.6
35.1442	1124.0	1099.2	-3469.2	843.2
35.1639	1085.0	1099.8	-3508.8	843.8
35.1836	1004.0	1100.4	-3590.4	844.4
35.2033	1097.0	1099.5	-3496.5	843.5
35.2230	1072.0	1098.6	-3520.6	842.6
35.2427	1084.0	1097.7	-3507.7	841.7
35.2625	1069.0	1096.7	-3521.7	840.7
35.2822	1129.0	1095.8	-3460.8	839.8
35.3019	1093.0	1094.9	-3495.9	838.9
35.3216	1085.0	1094.0	-3503.0	838.0
35.3413	1078.0	1093.1	-3509.1	837.1
35.3610	1118.0	1092.2	-3468.2	836.2
35.3807	1083.0	1091.3	-3502.3	835.3
35.4004	1103.0	1090.4	-3481.4	834.4
35.4201	1056.0	1089.5	-3527.5	833.5
35.4398	1099.0	1088.6	-3483.6	832.6
35.4595	1102.0	1087.7	-3479.7	831.7
35.4792	1097.0	1086.8	-3483.8	830.8
35.4989	1095.0	1085.9	-3484.9	829.9
35.5186	1091.0	1085.0	-3488.0	829.0
35.5383	1018.0	1084.0	-3560.0	828.0
35.5580	1027.0	1083.1	-3550.1	827.1
35.5777	1096.0	1082.2	-3480.2	826.2
35.5974	1017.0	1081.3	-3558.3	825.3
35.6172	1083.0	1080.4	-3491.4	824.4
35.6369	1034.0	1079.5	-3539.5	823.5
35.6566	1123.0	1078.6	-3449.6	822.6
35.6763	1093.0	1077.7	-3478.7	821.7
35.6960	1103.0	1076.8	-3467.8	820.8
35.7157	1078.0	1075.9	-3491.9	819.9
35.7354	1152.0	1075.0	-3417.0	819.0
35.7551	1144.0	1074.1	-3424.1	818.1
35.7748	1056.0	1073.2	-3511.2	817.2
35.7945	1077.0	1072.2	-3489.2	816.2
35.8142	1093.0	1071.3	-3472.3	815.3
35.8339	1111.0	1070.4	-3453.4	814.4
35.8536	1085.0	1069.5	-3478.5	813.5
35.8733	1064.0	1068.6	-3498.6	812.6
35.8930	1067.0	1068.2	-3495.2	811.7
35.9127	1059.0	1067.3	-3502.3	810.8
35.9324	1011.0	1066.4	-3549.4	809.9
35.9521	1013.0	1065.6	-3546.6	809.0
35.9718	1036.0	1064.7	-3522.7	808.1
35.9916	1123.0	1063.8	-3434.8	807.2
36.0113	1029.0	1063.0	-3528.0	806.3
36.0310	1054.0	1062.1	-3502.1	805.4
36.0507	1056.0	1061.3	-3499.3	804.5
36.0704	1051.0	1060.4	-3503.4	803.5
36.0901	1078.0	1059.6	-3475.6	802.6
36.1098	1106.0	1058.8	-3446.8	801.7
36.1295	1056.0	1058.0	-3496.0	800.8
36.1492	1053.0	1057.2	-3498.2	799.9
36.1689	1123.0	1056.4	-3427.4	799.0
36.1886	1078.0	1055.7	-3471.7	798.1
36.2083	1072.0	1054.9	-3476.9	797.2
36.2280	1048.0	1054.2	-3500.2	796.3
36.2477	991.0	1053.6	-3556.6	795.4
36.2674	1022.0	1054.4	-3526.4	795.9
36.2871	1032.0	1055.3	-3517.3	796.4
36.3068	1094.0	1056.3	-3456.3	796.9
36.3265	1053.0	1057.4	-3498.4	797.4
36.3463	1063.0	1058.7	-3489.7	798.0
36.3660	1075.0	1060.2	-3479.2	798.5
36.3857	1065.0	1062.0	-3491.0	799.0
36.4054	1052.0	1064.5	-3506.5	799.5
36.4251	1045.0	1068.1	-3517.1	800.0
36.4448	1037.0	1074.4	-3531.4	800.5
36.4645	1101.0	1087.6	-3480.6	801.0
36.4842	1095.0	1114.5	-3513.5	801.5
36.5039	1196.0	1161.6	-3459.6	802.1
36.5236	1280.0	1224.6	-3438.6	802.6
36.5433	1263.0	1275.5	-3506.5	803.1
36.5630	1318.0	1269.3	-3445.3	803.6
36.5827	1229.0	1213.3	-3478.3	804.1
36.6024	1163.0	1153.2	-3484.2	804.6
36.6221	1101.0	1111.4	-3504.4	805.1
36.6418	1055.0	1088.8	-3527.8	805.7
36.6615	1045.0	1078.5	-3527.5	806.2
36.6812	1142.0	1074.0	-3426.0	806.7
36.7010	1079.0	1071.7	-3486.7	807.2
36.7207	1045.0	1070.5	-3519.5	807.7
36.7404	1068.0	1069.7	-3495.7	808.2
36.7601	1020.0	1069.3	-3543.3	808.7
36.7798	1041.0	1069.1	-3522.1	809.2
36.7995	1078.0	1069.0	-3485.0	809.8
36.8192	1053.0	1069.1	-3510.1	810.3
36.8389	1044.0	1069.2	-3519.2	810.8
36.8586	1083.0	1069.4	-3480.4	811.3
36.8783	1111.0	1069.7	-3452.7	811.8
36.8980	1055.0	1070.0	-3509.0	812.3
36.9177	1064.0	1070.4	-3500.4	812.8
36.9374	1074.0	1070.7	-3490.7	813.4
36.9571	1052.0	1071.1	-3513.1	813.9
36.9768	1028.0	1071.5	-3537.5	814.4
36.9965	1066.0	1071.9	-3499.9	814.9
37.0162	973.0	1072.4	-3593.4	815.4
37.0359	1109.0	1072.0	-3457.0	815.2
37.0557	1065.0	1071.7	-3500.7	814.9
37.0754	1112.0	1071.5	-3453.5	814.7
37.0951	1099.0	1071.2	-3466.2	814.5
37.1148	1079.0	1070.9	-3485.9	814.2
37.1345	1108.0	1070.6	-3456.6	814.0
37.1542	1055.0	1070.3	-3509.3	813.8
37.1739	1112.0	1070.1	-3452.1	813.5
37.1936	1112.0	1069.8	-3451.8	813.3
37.2133	1106.0	1069.6	-3457.6	813.1
37.2330	1022.0	1068.8	-3540.8	812.8
37.2527	1042.0	1068.6	-3520.6	812.6
37.2724	1027.0	1068.4	-3535.4	812.4
37.2921	1108.0	1068.1	-3454.1	812.1
37.3118	1046.0	1067.9	-3515.9	811.9
37.3315	1102.0	1067.7	-3459.7	811.7
37.3512	1053.0	1067.5	-3508.5	811.5
37.3709	1067.0	1067.2	-3494.2	811.2
37.3906	979.0	1067.0	-3582.0	811.0
37.4104	1037.0	1066.8	-3523.8	810.8
37.4301	1078.0	1066.5	-3482.5	810.5
37.4498	1023.0	1066.3	-3537.3	810.3
37.4695	1018.0	1066.1	-3542.1	810.1
37.4892	1057.0	1065.8	-3502.8	809.8
37.5089	1141.0	1065.6	-3418.6	809.6
37.5286	1092.0	1065.4	-3467.4	809.4
37.5483	1111.0	1065.1	-3448.1	809.1
37.5680	1101.0	1064.9	-3457.9	808.9
37.5877	1082.0	1064.7	-3476.7	808.7
37.6074	1100.0	1064.4	-3458.4	808.4
37.6271	1041.0	1064.2	-3517.2	808.2
37.6468	983.0	1064.0	-3575.0	808.0
37.6665	1020.0	1063.7	-3537.7	807.7
37.6862	1028.0	1063.5	-3529.5	807.5
37.7059	1075.0	1063.3	-3482.3	807.3
37.7256	1072.0	1063.0	-3485.0	807.0
37.7453	1089.0	1062.8	-3467.8	806.8
37.7650	1051.0	1062.6	-3505.6	806.6
37.7848	1046.0	1062.3	-3510.3	806.3
37.8045	1109.0	1062.1	-3447.1	806.1
37.8242	1091.0	1061.9	-3464.9	805.9
37.8439	1121.0	1061.6	-3434.6	805.6
37.8636	1085.0	1061.4	-3470.4	805.4
37.8833	1096.0	1061.2	-3459.2	805.2
37.9030	1042.0	1060.9	-3512.9	804.9
37.9227	1098.0	1060.7	-3456.7	804.7
37.9424	1074.0	1060.5	-3480.5	804.5
37.9621	1040.0	1060.2	-3514.2	804.2
37.9818	1112.0	1060.0	-3442.0	804.0
38.0015	1023.0	1059.8	-3530.8	803.8
38.0212	1045.0	1059.5	-3508.5	803.5
38.0409	1026.0	1059.3	-3527.3	803.3
38.0606	1068.0	1059.1	-3485.1	803.1
38.0803	1044.0	1058.8	-3508.8	802.8
38.1000	1067.0	1058.6	-3485.6	802.6
38.1197	1100.0	1058.4	-3452.4	802.4
38.1395	1040.0	1058.1	-3512.1	802.1
38.1592	1032.0	1057.9	-3519.9	801.9
38.1789	1104.0	1057.7	-3447.7	801.7
38.1986	1009.0	1057.4	-3542.4	801.4
38.2183	1084.0	1057.2	-3467.2	801.2
38.2380	1076.0	1057.0	-3475.0	801.0
38.2577	1031.0	1056.8	-3519.8	800.8
38.2774	1045.0	1056.5	-3505.5	800.5
38.2971	1023.0	1056.3	-3527.3	800.3
38.3168	1066.0	1056.1	-3484.1	800.1
38.3365	1081.0	1055.8	-3468.8	799.8
38.3562	1109.0	1055.6	-3440.6	799.6
38.3759	1075.0	1055.4	-3474.4	799.4
38.3956	1042.0	1055.1	-3507.1	799.1
38.4153	1024.0	1054.9	-3524.9	798.9
38.4350	1054.0	1054.7	-3494.7	798.7
38.4547	1012.0	1054.4	-3536.4	798.4
38.4744	1146.0	1054.2	-3402.2	798.2
38.4942	1031.0	1054.0	-3517.0	798.0
38.5139	1005.0	1053.7	-3542.7	797.7
38.5336	1051.0	1053.5	-3496.5	797.5
38.5533	1120.0	1053.3	-3427.3	797.3
38.5730	1044.0	1053.0	-3503.0	797.0
38.5927	1022.0	1052.8	-3524.8	796.8
38.6124	1123.0	1052.6	-3423.6	796.6
38.6321	999.0	1052.3	-3547.3	796.3
38.6518	1062.0	1052.1	-3484.1	796.1
38.6715	1054.0	1051.9	-3491.9	795.9
38.6912	1045.0	1051.6	-3500.6	795.6
38.7109	1049.0	1051.4	-3496.4	795.4
38.7306	1060.0	1051.2	-3485.2	795.2
38.7503	1021.0	1050.9	-3523.9	794.9
38.7700	1076.0	1050.7	-3468.7	794.7
38.7897	1017.0	1050.5	-3527.5	794.5
38.8094	1060.0	1050.2	-3484.2	794.2
38.8291	1046.0	1050.0	-3498.0	794.0
38.8489	1116.0	1049.8	-3427.8	793.8
38.8686	1100.0	1049.5	-3443.5	793.5
38.8883	1074.0	1049.3	-3469.3	793.3
38.9080	1092.0	1049.1	-3451.1	793.1
38.9277	1021.0	1048.8	-3521.8	792.8
38.9474	1036.0	1048.6	-3506.6	792.6
38.9671	1119.0	1048.4	-3423.4	792.4
38.9868	1085.0	1048.1	-3457.1	792.1
39.0065	1049.0	1047.9	-3492.9	791.9
39.0262	1086.0	1047.7	-3455.7	791.7
39.0459	1001.0	1047.4	-3540.4	791.4
39.0656	1083.0	1047.2	-3458.2	791.2
39.0853	1003.0	1047.0	-3538.0	791.0
39.1050	1094.0	1046.7	-3446.7	790.7
39.1247	1101.0	1046.5	-3439.5	790.5
39.1444	1020.0	1046.3	-3520.3	790.3
39.1641	1043.0	1046.1	-3497.1	790.1
39.1838	993.0	1045.8	-3546.8	789.8
39.2036	1001.0	1045.6	-3538.6	789.6
39.2233	1044.0	1045.4	-3495.4	789.4
39.2430	1076.0	1045.1	-3463.1	789.1
39.2627	1036.0	1044.9	-3502.9	788.9
39.2824	1069.0	1044.7	-3469.7	788.7
39.3021	1091.0	1044.4	-3447.4	788.4
39.3218	1002.0	1044.2	-3536.2	788.2
39.3415	1078.0	1044.0	-3460.0	788.0
39.3612	1062.0	1043.7	-3475.7	787.7
39.3809	1051.0	1043.5	-3486.5	787.5
39.4006	1045.0	1043.3	-3492.3	787.3
39.4203	1060.0	1043.0	-3477.0	787.0
39.4400	1080.0	1042.8	-3456.8	786.8
39.4597	1074.0	1042.6	-3462.6	786.6
39.4794	1063.0	1042.3	-3473.3	786.3
39.4991	1029.0	1042.1	-3507.1	786.1
39.5188	1042.0	1041.9	-3493.9	785.9
39.5385	986.0	1041.6	-3549.6	785.6
39.5583	1073.0	1041.4	-3462.4	785.4
39.5780	1043.0	1041.2	-3492.2	785.2
39.5977	1002.0	1040.9	-3532.9	784.9
39.6174	1006.0	1040.7	-3528.7	784.7
39.6371	1022.0	1040.5	-3512.5	784.5
39.6568	1001.0	1040.2	-3533.2	784.2
39.6765	966.0	1040.0	-3568.0	784.0
39.6962	1052.0	1041.1	-3483.1	785.1
39.7159	1063.0	1042.2	-3473.2	786.2
39.7356	1033.0	1043.3	-3504.3	787.3
39.7553	1040.0	1044.4	-3498.4	788.4
39.7750	988.0	1045.5	-3551.5	789.5
39.7947	1017.0	1046.6	-3523.6	790.6
39.8144	987.0	1047.6	-3554.6	791.6
39.8341	1011.0	1048.7	-3531.7	792.7
39.8538	1094.0	1049.8	-3449.8	793.8
39.8735	1056.0	1050.9	-3488.9	794.9
39.8932	1067.0	1052.0	-3479.0	796.0
39.9129	976.0	1053.1	-3571.1	797.1
39.9327	1065.0	1053.0	-3482.0	797.0
39.9524	1015.0	1052.8	-3531.8	796.8
39.9721	1081.0	1052.7	-3465.7	796.7
39.9918	1119.0	1052.6	-3427.6	796.6
40.0115	1040.0	1052.4	-3506.4	796.4
40.0312	1072.0	1052.3	-3474.3	796.3
40.0509	1028.0	1052.2	-3518.2	796.2
40.0706	1078.0	1052.0	-3468.0	796.0
40.0903	1044.0	1051.9	-3501.9	795.9
40.1100	1073.0	1051.8	-3472.8	795.8
40.1297	1072.0	1051.7	-3473.7	795.7
40.1494	1046.0	1051.5	-3499.5	795.5
40.1691	1007.0	1051.4	-3538.4	795.4
40.1888	1039.0	1051.3	-3506.3	795.3
40.2085	1040.0	1051.1	-3505.1	795.1
40.2282	1097.0	1051.0	-3448.0	795.0
40.2479	1092.0	1050.9	-3452.9	794.9
40.2676	1053.0	1050.7	-3491.7	794.7
40.2874	1028.0	1050.6	-3516.6	794.6
40.3071	1052.0	1050.5	-3492.5	794.5
40.3268	1089.0	1050.3	-3455.3	794.3
40.3465	1034.0	1050.2	-3510.2	794.2
40.3662	1095.0	1050.1	-3449.1	794.1
40.3859	1064.0	1049.9	-3479.9	793.9
40.4056	1074.0	1049.8	-3469.8	793.8
40.4253	1127.0	1049.7	-3416.7	793.7
40.4450	1071.0	1049.5	-3472.5	793.5
40.4647	1080.0	1049.4	-3463.4	793.4
40.4844	1031.0	1049.3	-3512.3	793.3
40.5041	1014.0	1049.1	-3529.1	793.1
40.5238	1044.0	1049.0	-3499.0	793.0
40.5435	1018.0	1048.9	-3524.9	792.9
40.5632	983.0	1048.7	-3559.7	792.7
40.5829	1075.0	1048.6	-3467.6	792.6
40.6026	1103.0	1048.5	-3439.5	792.5
40.6223	1072.0	1048.4	-3470.4	792.3
40.6421	1032.0	1048.2	-3510.2	792.2
40.6618	1051.0	1048.1	-3491.1	792.1
40.6815	1027.0	1048.0	-3515.0	792.0
40.7012	1004.0	1047.8	-3537.8	791.8
40.7209	1024.0	1047.7	-3517.7	791.7
40.7406	1021.0	1047.6	-3520.6	791.6
40.7603	1073.0	1047.4	-3468.4	791.4
40.7800	1038.0	1047.3	-3503.3	791.3
40.7997	1045.0	1047.2	-3496.2	791.2
40.8194	993.0	1047.0	-3548.0	791.0
40.8391	1102.0	1046.9	-3438.9	790.9
40.8588	1028.0	1046.8	-3512.8	790.8
40.8785	1052.0	1046.6	-3488.6	790.6
40.8982	1017.0	1046.5	-3523.5	790.5
40.9179	1020.0	1046.4	-3520.4	790.4
40.9376	1043.0	1046.2	-3497.2	790.2
40.9573	1100.0	1046.1	-3440.1	790.1
40.9770	1000.0	1046.0	-3540.0	790.0
40.9968	1059.0	1045.8	-3480.8	789.8
41.0165	1022.0	1045.7	-3517.7	789.7
41.0362	1049.0	1045.6	-3490.6	789.6
41.0559	1008.0	1045.4	-3531.4	789.4
41.0756	1098.0	1045.3	-3441.3	789.3
41.0953	1136.0	1045.2	-3403.2	789.2
41.1150	1023.0	1045.0	-3516.0	789.0
41.1347	1046.0	1044.9	-3492.9	788.9
41.1544	1049.0	1044.8	-3489.8	788.8
41.1741	1026.0	1044.7	-3512.7	788.7
41.1938	1066.0	1044.5	-3472.5	788.5
41.2135	1068.0	1044.4	-3470.4	788.4
41.2332	1058.0	1044.3	-3480.3	788.3
41.2529	1076.0	1044.1	-3462.1	788.1
41.2726	1059.0	1044.0	-3479.0	788.0
41.2923	1078.0	1043.9	-3459.9	787.9
41.3120	1064.0	1043.7	-3473.7	787.7
41.3317	1031.0	1043.6	-3506.6	787.6
41.3515	1068.0	1043.5	-3469.5	787.5
41.3712	1084.0	1043.3	-3453.3	787.3
41.3909	995.0	1043.2	-3542.2	787.2
41.4106	954.0	1043.1	-3583.1	787.1
41.4303	980.0	1043.1	-3557.1	787.1
41.4500	1001.0	1043.1	-3536.1	787.1
41.4697	1057.0	1043.1	-3480.1	787.1
41.4894	1045.0	1043.1	-3492.1	787.1
41.5091	1088.0	1043.1	-3449.1	787.1
41.5288	1039.0	1043.1	-3498.1	787.1
41.5485	996.0	1043.1	-3541.1	787.1
41.5682	1021.0	1043.1	-3516.1	787.1
41.5879	1108.0	1043.1	-3429.1	787.1
41.6076	1046.0	1043.1	-3491.1	787.1
41.6273	1066.0	1043.1	-3471.1	787.1
41.6470	1063.0	1043.1	-3474.1	787.1
41.6667	1031.0	1043.1	-3506.1	787.1
41.6864	1011.0	1043.1	-3526.1	787.1
41.7061	1038.0	1043.1	-3499.1	787.1
41.7259	976.0	1043.1	-3561.1	787.1
41.7456	1103.0	1043.1	-3434.1	787.1
41.7653	1032.0	1043.1	-3505.1	787.1
41.7850	986.0	1043.1	-3551.1	787.1
41.8047	1055.0	1043.1	-3482.1	787.1
41.8244	1068.0	1043.1	-3469.1	787.1
41.8441	1023.0	1043.1	-3514.1	787.1
41.8638	1019.0	1043.1	-3518.1	787.1
41.8835	1019.0	1043.1	-3518.1	787.1
41.9032	1048.0	1043.1	-3489.1	787.1
41.9229	1069.0	1043.1	-3468.1	787.1
41.9426	1051.0	1043.1	-3486.1	787.1
41.9623	1038.0	1043.1	-3499.1	787.1
41.9820	1029.0	1043.1	-3508.1	787.1
42.0017	1074.0	1043.1	-3463.1	787.1
42.0214	1071.0	1043.1	-3466.1	787.1
42.0411	1047.0	1043.1	-3490.1	787.1
42.0608	1082.0	1043.1	-3455.1	787.1
42.0806	1082.0	1043.1	-3455.1	787.1
42.1003	1048.0	1043.1	-3489.1	787.1
42.1200	1013.0	1043.1	-3524.1	787.1
42.1397	1053.0	1043.1	-3484.1	787.1
42.1594	999.0	1043.1	-3538.1	787.1
42.1791	1129.0	1043.1	-3408.1	787.1
42.1988	1057.0	1043.1	-3480.1	787.1
42.2185	1025.0	1043.1	-3512.1	787.1
42.2382	1081.0	1043.1	-3456.1	787.1
42.2579	1054.0	1043.1	-3483.1	787.1
42.2776	1064.0	1043.1	-3473.1	787.1
42.2973	1008.0	1043.1	-3529.1	787.1
42.3170	1075.0	1043.1	-3462.1	787.1
42.3367	1038.0	1043.1	-3499.1	787.1
42.3564	1058.0	1043.1	-3479.1	787.1
42.3761	1041.0	1043.1	-3496.1	787.1
42.3958	1078.0	1043.1	-3459.1	787.1
42.4155	1061.0	1043.1	-3476.1	787.1
42.4353	1069.0	1043.1	-3468.1	787.1
42.4550	1053.0	1043.1	-3484.1	787.1
42.4747	1039.0	1043.1	-3498.1	787.1
42.4944	1071.0	1043.1	-3466.1	787.1
42.5141	1024.0	1043.1	-3513.1	787.1
42.5338	997.0	1043.1	-3540.1	787.1
42.5535	1041.0	1043.1	-3496.1	787.1
42.5732	1042.0	1043.1	-3495.1	787.1
42.5929	1026.0	1043.1	-3511.1	787.1
42.6126	1029.0	1043.1	-3508.1	787.1
42.6323	1033.0	1043.1	-3504.1	787.1
42.6520	1038.0	1043.1	-3499.1	787.1
42.6717	1042.0	1043.1	-3495.1	787.1
42.6914	1027.0	1043.1	-3510.1	787.1
42.7111	1022.0	1043.1	-3515.1	787.1
42.7308	1029.0	1043.1	-3508.1	787.1
42.7505	1035.0	1043.1	-3502.1	787.1
42.7702	1005.0	1043.1	-3532.1	787.1
42.7900	1119.0	1043.1	-3418.1	787.1
42.8097	1155.0	1043.1	-3382.1	787.1
42.8294	1012.0	1043.1	-3525.1	787.1
42.8491	977.0	1043.1	-3560.1	787.1
42.8688	1085.0	1043.2	-3452.2	787.2
42.8885	1066.0	1043.2	-3471.2	787.2
42.9082	1047.0	1043.3	-3490.3	787.3
42.9279	1038.0	1043.3	-3499.3	787.3
42.9476	1045.0	1043.3	-3492.3	787.3
42.9673	1100.0	1043.4	-3437.4	787.4
42.9870	1027.0	1043.4	-3510.4	787.4
43.0067	995.0	1043.5	-3542.5	787.5
43.0264	1057.0	1043.5	-3480.5	787.5
43.0461	993.0	1043.6	-3544.6	787.6
43.0658	1041.0	1048.5	-3501.5	787.6
43.0855	1031.0	1048.8	-3511.8	787.7
43.1052	1101.0	1049.2	-3442.2	787.7
43.1249	1067.0	1049.6	-3476.6	787.8
43.1447	1068.0	1050.0	-3476.0	787.8
43.1644	1039.0	1050.4	-3505.4	787.8
43.1841	1074.0	1050.9	-3470.9	787.9
43.2038	1040.0	1051.5	-3505.5	787.9
43.2235	1017.0	1052.1	-3529.1	788.0
43.2432	1086.0	1052.7	-3460.7	788.0
43.2629	1053.0	1053.5	-3494.5	788.1
43.2826	1014.0	1054.3	-3534.3	788.1
43.3023	1026.0	1055.2	-3523.2	788.2
43.3220	1063.0	1059.5	-3490.5	788.2
43.3417	1009.0	1060.9	-3545.9	788.2
43.3614	1085.0	1062.5	-3471.5	788.3
43.3811	1092.0	1064.3	-3466.3	788.3
43.4008	1083.0	1066.3	-3477.3	788.4
43.4205	1118.0	1068.7	-3444.7	788.4
43.4402	1052.0	1071.5	-3513.5	788.5
43.4599	1119.0	1074.8	-3449.8	788.5
43.4796	1036.0	1078.8	-3536.8	788.6
43.4994	1088.0	1083.6	-3489.6	788.6
43.5191	1045.0	1089.5	-3538.5	788.6
43.5388	1082.0	1096.9	-3508.9	788.7
43.5585	1047.0	1106.2	-3553.2	788.7
43.5782	1118.0	1118.4	-3494.4	788.8
43.5979	1120.0	1134.9	-3508.9	788.8
43.6176	1193.0	1158.9	-3459.9	788.9
43.6373	1259.0	1199.0	-3434.0	788.9
43.6570	1318.0	1277.6	-3453.6	789.0
43.6767	1522.0	1441.4	-3413.4	789.0
43.6964	1781.0	1756.1	-3469.1	789.1
43.7161	2129.0	2261.2	-3626.2	789.1
43.7358	2619.0	2883.4	-3758.4	789.1
43.7555	3243.0	3336.2	-3587.2	789.2
43.7752	3257.0	3243.4	-3480.4	789.2
43.7949	2635.0	2699.4	-3558.4	789.3
43.8146	2018.0	2102.9	-3578.9	789.3
43.8343	1674.0	1666.5	-3486.5	789.4
43.8540	1420.0	1417.9	-3491.9	789.4
43.8738	1347.0	1303.4	-3450.4	789.5
43.8935	1276.0	1266.9	-3484.9	789.5
43.9132	1311.0	1283.2	-3466.2	789.5
43.9329	1436.0	1365.1	-3423.1	789.6
43.9526	1632.0	1549.8	-3411.8	789.6
43.9723	1871.0	1864.8	-3487.8	789.7
43.9920	2008.0	2269.7	-3755.7	789.7
44.0117	2460.0	2588.0	-3622.0	789.8
44.0314	2489.0	2559.1	-3564.1	789.8
44.0511	2303.0	2206.1	-3397.1	789.9
44.0708	1759.0	1801.8	-3536.8	789.9
44.0905	1508.0	1488.7	-3474.7	789.9
44.1102	1301.0	1301.6	-3494.6	790.0
44.1299	1153.0	1206.4	-3547.4	790.0
44.1496	1172.0	1160.6	-3482.6	790.1
44.1693	1100.0	1136.6	-3530.6	790.1
44.1890	1157.0	1121.9	-3458.9	790.2
44.2087	1128.0	1111.8	-3477.8	790.2
44.2285	1123.0	1104.5	-3475.5	790.3
44.2482	991.0	1099.0	-3602.0	790.3
44.2679	1098.0	1095.0	-3491.0	790.4
44.2876	1104.0	1092.1	-3482.1	790.4
44.3073	1093.0	1090.0	-3491.0	790.4
44.3270	1018.0	1088.7	-3564.7	790.5
44.3467	1043.0	1088.0	-3539.0	790.5
44.3664	1027.0	1087.9	-3554.9	790.6
44.3861	1124.0	1088.4	-3458.4	790.6
44.4058	1144.0	1089.4	-3439.4	790.7
44.4255	1091.0	1091.0	-3494.0	790.7
44.4452	1041.0	1093.4	-3546.4	790.8
44.4649	1061.0	1096.4	-3529.4	790.8
44.4846	1111.0	1095.9	-3478.9	790.8
44.5043	1043.0	1101.2	-3552.2	790.9
44.5240	1105.0	1108.0	-3497.0	790.9
44.5437	1114.0	1116.5	-3496.5	791.0
44.5634	1131.0	1127.4	-3490.4	791.0
44.5832	1151.0	1141.6	-3484.6	791.1
44.6029	1153.0	1160.4	-3501.4	791.1
44.6226	1235.0	1186.3	-3445.3	791.2
44.6423	1236.0	1225.0	-3483.0	791.2
44.6620	1332.0	1291.8	-3453.8	791.2
44.6817	1492.0	1425.8	-3427.8	791.3
44.7014	1773.0	1704.4	-3425.4	791.3
44.7211	2265.0	2231.7	-3460.7	791.4
44.7408	3052.0	3057.2	-3499.2	791.4
44.7605	4196.0	4050.5	-3348.5	791.5
44.7802	5187.0	4732.7	-3039.7	791.5
44.7999	4840.0	4529.8	-3183.8	791.6
44.8196	3881.0	3636.5	-3249.5	791.6
44.8393	2837.0	2676.6	-3333.6	791.6
44.8590	2111.0	1971.8	-3354.8	791.7
44.8787	1554.0	1560.5	-3500.5	791.7
44.8984	1439.0	1354.3	-3409.3	791.8
44.9181	1373.0	1255.3	-3376.3	791.8
44.9379	1183.0	1202.9	-3513.9	791.9
44.9576	1183.0	1170.5	-3481.5	791.9
44.9773	1124.0	1147.8	-3517.8	792.0
44.9970	1153.0	1130.9	-3471.9	792.0
45.0167	1063.0	1118.0	-3549.0	792.1
45.0364	1062.0	1107.8	-3539.8	792.1
45.0561	1045.0	1099.7	-3548.7	792.1
45.0758	1121.0	1093.2	-3466.2	792.2
45.0955	1089.0	1087.8	-3492.8	792.2
45.1152	1111.0	1083.4	-3466.4	792.3
45.1349	1123.0	1079.6	-3450.6	792.3
45.1546	1097.0	1076.5	-3473.5	792.4
45.1743	1103.0	1073.8	-3464.8	792.4
45.1940	1072.0	1071.5	-3493.5	792.5
45.2137	1060.0	1069.5	-3503.5	792.5
45.2334	1140.0	1067.7	-3421.7	792.5
45.2531	1088.0	1066.2	-3472.2	792.6
45.2728	1069.0	1064.9	-3489.9	792.6
45.2926	1116.0	1063.7	-3441.7	792.7
45.3123	1076.0	1062.6	-3480.6	792.7
45.3320	1098.0	1061.7	-3457.7	792.8
45.3517	1051.0	1060.9	-3503.9	792.8
45.3714	1118.0	1060.1	-3436.1	792.9
45.3911	1041.0	1059.4	-3512.4	792.9
45.4108	1006.0	1058.8	-3546.8	792.9
45.4305	1019.0	1058.3	-3533.3	793.0
45.4502	1002.0	1057.8	-3549.8	793.0
45.4699	1064.0	1057.4	-3487.4	793.1
45.4896	1055.0	1056.9	-3495.9	793.1
45.5093	1066.0	1049.2	-3477.2	793.2
45.5290	968.0	1049.2	-3575.2	793.2
45.5487	1094.0	1048.8	-3448.8	792.8
45.5684	1048.0	1048.4	-3494.4	792.4
45.5881	1007.0	1048.0	-3535.0	792.0
45.6078	1012.0	1047.6	-3529.6	791.6
45.6275	1016.0	1047.2	-3525.2	791.2
45.6472	1015.0	1046.8	-3525.8	790.8
45.6670	1058.0	1046.4	-3482.4	790.4
45.6867	999.0	1046.0	-3541.0	790.0
45.7064	1062.0	1045.6	-3477.6	789.6
45.7261	1018.0	1045.2	-3521.2	789.2
45.7458	1074.0	1044.8	-3464.8	788.8
45.7655	1044.0	1044.4	-3494.4	788.4
45.7852	1068.0	1044.0	-3470.0	788.0
45.8049	1033.0	1043.6	-3504.6	787.6
45.8246	1006.0	1043.2	-3531.2	787.2
45.8443	1056.0	1042.8	-3480.8	786.8
45.8640	1023.0	1042.4	-3513.4	786.4
45.8837	1007.0	1042.0	-3529.0	786.0
45.9034	1015.0	1041.6	-3520.6	785.6
45.9231	968.0	1041.2	-3567.2	785.2
45.9428	1037.0	1040.8	-3497.8	784.8
45.9625	1063.0	1040.4	-3471.4	784.4
45.9822	1043.0	1040.0	-3491.0	784.0
46.0019	1033.0	1039.6	-3500.6	783.6
46.0217	1034.0	1039.2	-3499.2	783.2
46.0414	1109.0	1038.8	-3423.8	782.8
46.0611	1055.0	1038.4	-3477.4	782.4
46.0808	1007.0	1038.0	-3525.0	782.0
46.1005	1052.0	1037.6	-3479.6	781.6
46.1202	1053.0	1037.2	-3478.2	781.2
46.1399	1061.0	1036.8	-3469.8	780.8
46.1596	1069.0	1036.4	-3461.4	780.4
46.1793	993.0	1036.0	-3537.0	780.0
46.1990	1022.0	1035.6	-3507.6	779.6
46.2187	1083.0	1035.2	-3446.2	779.2
46.2384	1053.0	1034.8	-3475.8	778.8
46.2581	1092.0	1034.4	-3436.4	778.4
46.2778	1051.0	1034.0	-3477.0	778.0
46.2975	996.0	1033.6	-3531.6	777.6
46.3172	1037.0	1033.2	-3490.2	777.2
46.3369	977.0	1032.8	-3549.8	776.8
46.3566	1051.0	1032.4	-3475.4	776.4
46.3764	1011.0	1032.0	-3515.0	776.0
46.3961	943.0	1031.6	-3582.6	775.6
46.4158	1040.0	1031.2	-3485.2	775.2
46.4355	999.0	1030.8	-3525.8	774.8
46.4552	1018.0	1030.4	-3506.4	774.4
46.4749	1006.0	1030.0	-3518.0	774.0
46.4946	1009.0	1029.6	-3514.6	773.6
46.5143	1056.0	1029.2	-3467.2	773.2
46.5340	1058.0	1028.8	-3464.8	772.8
46.5537	1077.0	1028.4	-3445.4	772.4
46.5734	999.0	1028.0	-3523.0	772.0
46.5931	1044.0	1027.6	-3477.6	771.6
46.6128	1072.0	1027.2	-3449.2	771.2
46.6325	1058.0	1026.8	-3462.8	770.8
46.6522	1073.0	1026.4	-3447.4	770.4
46.6719	1077.0	1026.0	-3443.0	770.0
46.6916	1015.0	1025.6	-3504.6	769.6
46.7113	1056.0	1025.2	-3463.2	769.2
46.7311	939.0	1024.8	-3579.8	768.8
46.7508	1033.0	1024.8	-3485.8	768.8
46.7705	1027.0	1024.8	-3491.8	768.8
46.7902	1037.0	1024.7	-3481.7	768.7
46.8099	1008.0	1024.7	-3510.7	768.7
46.8296	1048.0	1024.7	-3470.7	768.7
46.8493	1040.0	1024.7	-3478.7	768.7
46.8690	1058.0	1024.7	-3460.7	768.7
46.8887	1040.0	1024.7	-3478.7	768.7
46.9084	1016.0	1024.7	-3502.7	768.7
46.9281	1015.0	1024.7	-3503.7	768.7
46.9478	1031.0	1024.7	-3487.7	768.7
46.9675	988.0	1024.7	-3530.7	768.7
46.9872	1065.0	1024.7	-3453.7	768.7
47.0069	1026.0	1024.7	-3492.7	768.7
47.0266	967.0	1024.6	-3551.6	768.6
47.0463	1066.0	1024.6	-3452.6	768.6
47.0660	952.0	1024.6	-3566.6	768.6
47.0858	1046.0	1024.6	-3472.6	768.6
47.1055	1029.0	1024.6	-3489.6	768.6
47.1252	1035.0	1024.6	-3483.6	768.6
47.1449	1028.0	1024.6	-3490.6	768.6
47.1646	1064.0	1024.6	-3454.6	768.6
47.1843	1071.0	1024.6	-3447.6	768.6
47.2040	995.0	1024.6	-3523.6	768.6
47.2237	1072.0	1024.6	-3446.6	768.6
47.2434	1018.0	1024.6	-3500.6	768.6
47.2631	1011.0	1034.0	-3517.0	768.5
47.2828	1007.0	1034.5	-3521.5	768.5
47.3025	1116.0	1035.1	-3413.1	768.5
47.3222	1054.0	1035.7	-3475.7	768.5
47.3419	1038.0	1036.4	-3492.4	768.5
47.3616	1021.0	1037.1	-3510.1	768.5
47.3813	983.0	1037.9	-3548.9	768.5
47.4010	1025.0	1038.8	-3507.8	768.5
47.4207	1040.0	1039.8	-3493.8	768.5
47.4404	1042.0	1040.9	-3492.9	768.5
47.4602	1073.0	1042.1	-3463.1	768.5
47.4799	1035.0	1043.5	-3502.5	768.4
47.4996	1057.0	1045.0	-3482.0	768.4
47.5193	1001.0	1046.7	-3539.7	768.4
47.5390	1046.0	1048.6	-3496.6	768.4
47.5587	1076.0	1050.8	-3468.8	768.4
47.5784	1087.0	1053.4	-3460.4	768.4
47.5981	1056.0	1056.3	-3494.3	768.4
47.6178	1023.0	1059.6	-3530.6	768.4
47.6375	1039.0	1063.5	-3518.5	768.4
47.6572	1103.0	1068.1	-3459.1	768.4
47.6769	1099.0	1073.6	-3468.6	768.4
47.6966	1062.0	1080.1	-3512.1	768.4
47.7163	1001.0	1088.0	-3581.0	768.3
47.7360	1089.0	1097.7	-3502.7	768.3
47.7557	1076.0	1109.8	-3527.8	768.3
47.7754	1073.0	1125.1	-3546.1	768.3
47.7951	1158.0	1144.9	-3480.9	768.3
47.8149	1108.0	1171.2	-3557.2	768.3
47.8346	1169.0	1207.9	-3532.9	768.3
47.8543	1291.0	1265.0	-3468.0	768.3
47.8740	1387.0	1368.8	-3475.8	768.3
47.8937	1569.0	1579.1	-3504.1	768.3
47.9134	1902.0	2000.6	-3592.6	768.3
47.9331	2584.0	2747.2	-3657.2	768.3
47.9528	3721.0	3833.4	-3606.4	768.2
47.9725	4836.0	5015.3	-3673.3	768.2
47.9922	5553.0	5663.0	-3604.0	768.2
48.0119	5174.0	5224.8	-3544.8	768.2
48.0316	3891.0	4091.7	-3694.7	768.2
48.0513	2871.0	2952.7	-3575.7	768.2
48.0710	2334.0	2129.1	-3289.1	768.2
48.0907	1754.0	1646.8	-3386.8	768.2
48.1104	1589.0	1401.5	-3306.5	768.2
48.1301	1403.0	1281.7	-3372.7	768.2
48.1498	1282.0	1217.6	-3429.6	768.2
48.1696	1239.0	1177.6	-3432.6	768.2
48.1893	1156.0	1149.6	-3487.6	768.1
48.2090	1118.0	1128.7	-3504.7	768.1
48.2287	1154.0	1112.6	-3452.6	768.1
48.2484	1143.0	1099.9	-3450.9	768.1
48.2681	1095.0	1089.7	-3488.7	768.1
48.2878	1053.0	1081.4	-3522.4	768.1
48.3075	1085.0	1074.6	-3483.6	768.1
48.3272	1100.0	1068.9	-3462.9	768.1
48.3469	1007.0	1064.1	-3551.1	768.1
48.3666	1037.0	1060.1	-3517.1	768.1
48.3863	1059.0	1056.6	-3491.6	768.1
48.4060	1059.0	1053.6	-3488.6	768.1
48.4257	1047.0	1051.0	-3498.0	768.0
48.4454	1100.0	1048.7	-3442.7	768.0
48.4651	1028.0	1046.7	-3512.7	768.0
48.4848	1058.0	1044.9	-3480.9	768.0
48.5045	1021.0	1043.3	-3516.3	768.0
48.5243	971.0	1041.9	-3564.9	768.0
48.5440	1044.0	1040.9	-3490.9	768.3
48.5637	1007.0	1040.1	-3527.1	768.6
48.5834	1025.0	1039.4	-3508.4	768.8
48.6031	1045.0	1038.7	-3487.7	769.1
48.6228	1014.0	1038.2	-3518.2	769.4
48.6425	988.0	1037.7	-3543.7	769.7
48.6622	1047.0	1037.3	-3484.3	769.9
48.6819	1012.0	1036.9	-3518.9	770.2
48.7016	1056.0	1036.6	-3474.6	770.5
48.7213	1012.0	1036.3	-3518.3	770.8
48.7410	1045.0	1027.0	-3476.0	771.0
48.7607	1007.0	1027.3	-3514.3	771.3
48.7804	1004.0	1027.6	-3517.6	771.6
48.8001	1100.0	1027.9	-3421.9	771.9
48.8198	1065.0	1028.1	-3457.1	772.1
48.8395	1015.0	1028.4	-3507.4	772.4
48.8592	1001.0	1028.7	-3521.7	772.7
48.8790	1039.0	1029.0	-3484.0	773.0
48.8987	1082.0	1029.2	-3441.2	773.2
48.9184	1012.0	1029.5	-3511.5	773.5
48.9381	1016.0	1029.8	-3507.8	773.8
48.9578	1038.0	1030.1	-3486.1	774.1
48.9775	1069.0	1030.3	-3455.3	774.3
48.9972	1043.0	1030.6	-3481.6	774.6
49.0169	1018.0	1030.9	-3506.9	774.9
49.0366	1024.0	1031.2	-3501.2	775.2
49.0563	1046.0	1031.4	-3479.4	775.4
49.0760	1140.0	1031.7	-3385.7	775.7
49.0957	1021.0	1032.0	-3505.0	776.0
49.1154	1038.0	1032.3	-3488.3	776.3
49.1351	1003.0	1032.5	-3523.5	776.5
49.1548	1084.0	1032.8	-3442.8	776.8
49.1745	1085.0	1033.1	-3442.1	777.1
49.1942	1017.0	1033.4	-3510.4	777.4
49.2139	1081.0	1033.6	-3446.6	777.6
49.2337	1032.0	1033.9	-3495.9	777.9
49.2534	1025.0	1034.2	-3503.2	778.2
49.2731	1018.0	1034.5	-3510.5	778.5
49.2928	1095.0	1034.7	-3433.7	778.7
49.3125	973.0	1035.0	-3556.0	779.0
49.3322	1016.0	1035.3	-3513.3	779.3
49.3519	1075.0	1035.6	-3454.6	779.6
49.3716	972.0	1035.8	-3557.8	779.8
[truncated: 3,584 more rows]
