# Supplementary material for: Structural and microstructural characterization and properties of new phases in the Nd–Sr–Co–(Fe/Mn)–O system as air-electrodes in SOFCs
Source: Royal Society of Chemistry journal article supplement (doi:10.1039/c6dt03970g), 2016-12-17
Supplement: c6dt03970g3.dat [file c6dt03970g3.dat]

2Theta	Yobs	Ycal	Yobs-Ycal	Backg	Bragg	Posr	(hkl)	K
10.0000	11871.0	11678.3	-17378.0	10511.9	14.3591	0	( 0 0 2)	0 1
10.0197	11837.0	11678.3	-17219.3	10511.9	24.5850	0	( 1 0 1)	0 1
10.0394	11710.0	11678.3	-17346.3	10511.9	28.9258	0	( 0 0 4)	0 1
10.0591	11852.0	11678.3	-17204.3	10511.9	32.1110	0	( 1 0 3)	0 1
10.0788	12041.0	11678.3	-17015.3	10511.9	33.4494	0	( 1 1 0)	0 1
10.0985	11961.0	11678.3	-17095.3	10511.9	36.5617	0	( 1 1 2)	0 1
10.1182	11996.0	11678.3	-17060.3	10511.9	43.7472	0	( 1 0 5)	0 1
10.1379	11956.0	11678.3	-17100.3	10511.9	43.9897	0	( 0 0 6)	0 1
10.1576	11840.0	11678.3	-17216.3	10511.9	44.7851	0	( 1 1 4)	0 1
10.1773	11914.0	11678.3	-17142.3	10511.9	48.0184	0	( 2 0 0)	0 1
10.1971	11915.0	11678.3	-17141.3	10511.9	50.3764	0	( 2 0 2)	0 1
10.2168	11930.0	11678.3	-17126.3	10511.9	54.6636	0	( 2 1 1)	0 1
10.2365	11831.0	11678.3	-17225.3	10511.9	56.3578	0	( 1 1 6)	0 1
10.2562	11836.0	11678.3	-17220.3	10511.9	57.0235	0	( 2 0 4)	0 1
10.2759	11817.0	11678.3	-17239.3	10511.9	57.6222	0	( 1 0 7)	0 1
10.2956	11780.0	11678.3	-17276.3	10511.9	58.9303	0	( 2 1 3)	0 1
10.3153	11552.0	11678.3	-17504.3	10511.9	59.9059	0	( 0 0 8)	0 1
10.3350	11867.0	11678.3	-17189.3	10511.9	66.9523	0	( 2 1 5)	0 1
10.3547	11796.0	11678.3	-17260.3	10511.9	67.1347	0	( 2 0 6)	0 1
10.3744	11881.0	11678.3	-17175.3	10511.9	70.2447	0	( 2 2 0)	0 1
10.3941	11690.0	11678.3	-17366.3	10511.9	70.3675	0	( 1 1 8)	0 1
10.4138	11791.0	11678.3	-17265.3	10511.9	72.1299	0	( 2 2 2)	0 1
10.4335	11768.0	11678.3	-17288.3	10511.9	73.3611	0	( 1 0 9)	0 1
10.4532	11761.0	11678.3	-17295.3	10511.9	75.6700	0	( 3 0 1)	0 1
10.4729	11827.0	11678.3	-17229.3	10511.9	77.2250	0	( 0 0 10)	0 1
10.4926	11684.0	11678.3	-17372.3	10511.9	77.6764	0	( 2 2 4)	0 1
10.5123	11829.0	11678.3	-17227.3	10511.9	78.1917	0	( 2 1 7)	0 1
10.5320	11743.0	11678.3	-17313.3	10511.9	79.3259	0	( 3 0 3)	0 1
10.5518	11758.0	11678.3	-17298.3	10511.9	80.0620	0	( 3 1 0)	0 1
10.5715	11637.0	11678.3	-17419.3	10511.9	80.1793	0	( 2 0 8)	0 1
10.5912	11870.0	11678.3	-17186.3	10511.9	81.8687	0	( 3 1 2)	0 1
10.6109	11758.0	11678.3	-17298.3	10511.9	86.5224	0	( 3 0 5)	0 1
10.6306	11603.0	11678.3	-17453.3	10511.9	86.6906	0	( 2 2 6)	0 1
10.6503	11701.0	11678.3	-17355.3	10511.9	86.8064	0	( 1 1 10)	0 1
10.6700	11653.0	11678.3	-17403.3	10511.9	87.2476	0	( 3 1 4)	0 1
10.6897	11733.0	11678.3	-17323.3	10511.9	91.4366	0	( 1 0 11)	0 1
10.7094	11710.0	11678.3	-17346.3	10511.9	92.5496	0	( 2 1 9)	0 1
10.7291	11748.0	11678.3	-17308.3	10511.9	94.7790	0	( 3 2 1)	0 1
10.7488	11918.0	11678.3	-17138.3	10511.9	96.1813	0	( 3 1 6)	0 1
10.7685	11582.0	11678.3	-17474.3	10511.9	96.2976	0	( 2 0 10)	0 1
10.7882	11682.0	11678.3	-17374.3	10511.9	96.9739	0	( 0 0 12)	0 1
10.8079	11582.0	11678.3	-17474.3	10511.9	97.2486	0	( 3 0 7)	0 1
10.8276	11585.0	11678.3	-17471.3	10511.9	98.3713	0	( 3 2 3)	0 1
10.8473	11492.0	11678.3	-17564.3	10511.9	99.2210	0	( 2 2 8)	0 1
10.8670	11514.0	11678.3	-17542.3	10511.9	105.6723	0	( 3 2 5)	0 1
10.8867	11659.0	11678.3	-17397.3	10511.9	106.6668	0	( 1 1 12)	0 1
10.9065	11506.0	11678.3	-17550.3	10511.9	108.8816	0	( 4 0 0)	0 1
10.9262	11388.0	11678.3	-17668.3	10511.9	109.0038	0	( 3 1 8)	0 1
10.9459	11467.0	11678.3	-17589.3	10511.9	110.7780	0	( 4 0 2)	0 1
10.9656	11470.0	11678.3	-17586.3	10511.9	110.8456	0	( 2 1 11)	0 1
10.9853	11447.0	11678.3	-17609.3	10511.9	112.0406	0	( 3 0 9)	0 1
11.0050	11574.0	11678.3	-17482.3	10511.9	113.4975	0	( 1 0 13)	0 1
11.0247	11442.0	11678.3	-17614.3	10511.9	114.4617	0	( 4 1 1)	0 1
11.0444	11405.0	11678.3	-17651.3	10511.9	116.1333	0	( 2 2 10)	0 1
11.0641	11549.0	11678.3	-17507.3	10511.9	116.6250	0	( 4 0 4)	0 1
11.0838	11569.0	11678.3	-17487.3	10511.9	116.8839	0	( 2 0 12)	0 1
11.1035	11402.0	11678.3	-17654.3	10511.9	117.1899	0	( 3 2 7)	0 1
11.1232	11698.0	11678.3	-17358.3	10511.9	118.4474	0	( 4 1 3)	0 1
11.1429	11543.0	11678.3	-17513.3	10511.9	119.2740	0	( 3 3 0)	0 1
11.1626	11678.0	11678.3	-17378.3	10511.9	121.3402	0	( 3 3 2)	0 1
11.1823	11293.0	11678.3	-17763.3	10511.9	121.7470	0	( 0 0 14)	0 1
11.2020	11452.0	11689.8	-17615.8	10523.5
11.2217	11285.0	11678.3	-17771.3	10511.9
11.2414	11470.0	11666.7	-17574.7	10500.4
11.2612	11435.0	11655.0	-17598.0	10488.7
11.2809	11485.0	11643.4	-17536.4	10477.1
11.3006	11611.0	11631.9	-17398.9	10465.5
11.3203	11819.0	11620.3	-17179.3	10454.0
11.3400	11399.0	11608.7	-17587.7	10442.4
11.3597	11583.0	11597.1	-17392.1	10430.8
11.3794	11517.0	11585.5	-17446.5	10419.2
11.3991	11508.0	11573.9	-17443.9	10407.6
11.4188	11484.0	11562.3	-17456.3	10396.0
11.4385	11331.0	11550.8	-17597.8	10384.4
11.4582	11331.0	11539.2	-17586.2	10372.9
11.4779	11353.0	11527.6	-17552.6	10361.3
11.4976	11406.0	11516.0	-17488.0	10349.7
11.5173	11355.0	11504.4	-17527.4	10338.1
11.5370	11464.0	11492.8	-17406.8	10326.5
11.5567	11239.0	11481.2	-17620.2	10314.9
11.5764	11355.0	11469.7	-17492.7	10303.4
11.5961	11404.0	11458.1	-17432.1	10291.8
11.6159	11412.0	11446.4	-17412.4	10280.1
11.6356	11144.0	11434.8	-17668.8	10268.5
11.6553	11281.0	11423.3	-17520.3	10257.0
11.6750	11317.0	11411.7	-17472.7	10245.4
11.6947	11266.0	11400.1	-17512.1	10233.8
11.7144	11452.0	11388.5	-17314.5	10222.2
11.7341	11365.0	11376.9	-17389.9	10210.6
11.7538	11247.0	11365.3	-17496.3	10199.0
11.7735	11371.0	11353.8	-17360.8	10187.4
11.7932	11257.0	11342.2	-17463.2	10175.9
11.8129	11176.0	11330.6	-17532.6	10164.3
11.8326	11414.0	11319.0	-17283.0	10152.7
11.8523	11116.0	11307.4	-17569.4	10141.1
11.8720	11132.0	11295.8	-17541.8	10129.5
11.8917	11192.0	11284.2	-17470.2	10117.9
11.9114	11261.0	11272.7	-17389.7	10106.3
11.9311	11020.0	11261.1	-17619.1	10094.8
11.9508	11135.0	11249.5	-17492.5	10083.2
11.9705	11176.0	11237.9	-17439.9	10071.6
11.9903	11226.0	11226.3	-17378.3	10059.9
12.0100	11036.0	11214.7	-17556.7	10048.4
12.0297	11129.0	11203.1	-17452.1	10036.8
12.0494	11210.0	11191.5	-17359.5	10025.2
12.0691	11192.0	11179.9	-17365.9	10013.6
12.0888	11319.0	11168.3	-17227.3	10002.0
12.1085	11038.0	11156.7	-17496.7	9990.4
12.1282	10909.0	11145.2	-17614.2	9978.9
12.1479	10927.0	11133.6	-17584.6	9967.3
12.1676	11129.0	11122.0	-17371.0	9955.7
12.1873	11116.0	11110.4	-17372.4	9944.1
12.2070	10948.0	11098.8	-17528.8	9932.5
12.2267	11142.0	11087.2	-17323.2	9920.9
12.2464	11076.0	11075.6	-17377.6	9909.3
12.2661	11095.0	11064.1	-17347.1	9897.8
12.2858	11091.0	11052.5	-17339.5	9886.2
12.3055	11270.0	11040.9	-17148.9	9874.6
12.3252	11049.0	11029.3	-17358.3	9863.0
12.3450	11037.0	11017.7	-17358.7	9851.4
12.3647	11115.0	11006.1	-17269.1	9839.8
12.3844	11042.0	10994.5	-17330.5	9828.2
12.4041	11169.0	10982.9	-17191.9	9816.6
12.4238	11246.0	10971.3	-17103.3	9805.0
12.4435	10967.0	10959.7	-17370.7	9793.4
12.4632	11138.0	10948.2	-17188.2	9781.8
12.4829	10920.0	10936.6	-17394.6	9770.3
12.5026	11186.0	10925.0	-17117.0	9758.7
12.5223	10781.0	10913.4	-17510.4	9747.1
12.5420	10981.0	10901.8	-17298.8	9735.5
12.5617	10934.0	10890.2	-17334.2	9723.9
12.5814	10799.0	10878.6	-17457.6	9712.3
12.6011	10933.0	10867.1	-17312.1	9700.7
12.6208	10925.0	10855.5	-17308.5	9689.2
12.6405	10768.0	10843.9	-17453.9	9677.6
12.6602	10905.0	10832.3	-17305.3	9666.0
12.6799	10939.0	10820.7	-17259.7	9654.4
12.6997	10710.0	10809.1	-17477.1	9642.8
12.7194	11066.0	10797.5	-17109.5	9631.2
12.7391	11073.0	10785.9	-17090.9	9619.6
12.7588	10916.0	10774.3	-17236.3	9608.0
12.7785	10902.0	10762.7	-17238.7	9596.4
12.7982	10781.0	10751.1	-17348.1	9584.8
12.8179	10658.0	10739.6	-17459.6	9573.3
12.8376	10824.0	10728.0	-17282.0	9561.7
12.8573	10641.0	10716.4	-17453.4	9550.1
12.8770	10603.0	10704.8	-17479.8	9538.5
12.8967	10753.0	10697.5	-17322.5	9531.2
12.9164	10775.0	10690.2	-17293.2	9523.9
12.9361	10691.0	10682.9	-17369.9	9516.6
12.9558	10839.0	10675.6	-17214.6	9509.3
12.9755	10869.0	10668.3	-17177.3	9502.0
12.9952	10851.0	10661.0	-17188.0	9494.7
13.0149	10797.0	10653.7	-17234.7	9487.4
13.0346	10684.0	10646.4	-17340.4	9480.1
13.0544	10715.0	10639.1	-17302.1	9472.8
13.0741	10687.0	10631.8	-17322.8	9465.5
13.0938	10868.0	10624.5	-17134.5	9458.2
13.1135	10571.0	10617.2	-17424.2	9450.9
13.1332	10745.0	10609.9	-17242.9	9443.6
13.1529	10746.0	10602.6	-17234.6	9436.3
13.1726	10727.0	10595.3	-17246.3	9429.0
13.1923	10504.0	10588.0	-17462.0	9421.7
13.2120	10755.0	10580.7	-17203.7	9414.4
13.2317	10548.0	10573.4	-17403.4	9407.1
13.2514	10533.0	10566.1	-17411.1	9399.8
13.2711	10566.0	10558.8	-17370.8	9392.5
13.2908	10618.0	10551.5	-17311.5	9385.2
13.3105	10790.0	10544.2	-17132.2	9377.9
13.3302	10521.0	10536.9	-17393.9	9370.6
13.3499	10578.0	10529.6	-17329.6	9363.3
13.3696	10611.0	10522.3	-17289.3	9356.0
13.3893	10634.0	10515.0	-17259.0	9348.7
13.4091	10484.0	10507.7	-17401.7	9341.4
13.4288	10467.0	10500.4	-17411.4	9334.1
13.4485	10580.0	10493.1	-17291.1	9326.8
13.4682	10487.0	10485.8	-17376.8	9319.5
13.4879	10558.0	10478.5	-17298.5	9312.2
13.5076	10464.0	10471.2	-17385.2	9304.9
13.5273	10623.0	10463.9	-17218.9	9297.6
13.5470	10420.0	10456.6	-17414.6	9290.3
13.5667	10313.0	10449.3	-17514.3	9283.0
13.5864	10537.0	10442.0	-17283.0	9275.7
13.6061	10519.0	10434.7	-17293.7	9268.4
13.6258	10367.0	10427.4	-17438.4	9261.1
13.6455	10432.0	10420.1	-17366.1	9253.8
13.6652	10386.0	10412.8	-17404.8	9246.5
13.6849	10445.0	10405.5	-17338.5	9239.2
13.7046	10457.0	10398.2	-17319.2	9231.9
13.7243	10473.0	10395.1	-17300.1	9224.6
13.7440	10205.0	10388.1	-17561.1	9217.3
13.7638	10424.0	10381.1	-17335.1	9210.0
13.7835	10303.0	10374.1	-17449.1	9202.7
13.8032	10111.0	10367.2	-17634.2	9195.4
13.8229	10536.0	10358.8	-17200.8	9186.6
13.8426	10400.0	10350.5	-17328.5	9177.8
13.8623	10330.0	10342.2	-17390.2	9169.0
13.8820	10387.0	10334.0	-17325.0	9160.2
13.9017	10431.0	10325.9	-17272.9	9151.5
13.9214	10294.0	10317.9	-17401.9	9142.7
13.9411	10335.0	10309.9	-17352.9	9133.9
13.9608	10457.0	10302.1	-17223.1	9125.1
13.9805	10316.0	10294.5	-17356.5	9116.3
14.0002	10246.0	10287.0	-17419.0	9107.6
14.0199	10288.0	10279.8	-17369.8	9098.8
14.0396	10208.0	10272.8	-17442.8	9090.0
14.0593	10365.0	10266.2	-17279.2	9081.2
14.0790	10311.0	10260.1	-17327.1	9072.5
14.0987	10120.0	10254.6	-17512.6	9063.7
14.1184	10330.0	10249.9	-17297.9	9054.9
14.1382	10324.0	10246.2	-17300.2	9046.1
14.1579	10305.0	10244.1	-17317.1	9037.3
14.1776	10445.0	10244.1	-17177.1	9028.5
14.1973	10284.0	10247.3	-17341.3	9019.7
14.2170	10492.0	10256.2	-17142.2	9011.0
14.2367	10603.0	10279.2	-17054.2	9002.2
14.2564	10491.0	10343.6	-17230.6	8993.4
14.2761	10967.0	10521.8	-16932.8	8984.6
14.2958	11207.0	10936.9	-17107.9	8975.8
14.3155	11669.0	11674.8	-17383.8	8967.1
14.3352	12368.0	12592.8	-17602.8	8958.3
14.3549	12607.0	13184.0	-17955.0	8949.5
14.3746	12487.0	12912.7	-17803.7	8940.7
14.3943	11466.0	12035.4	-17947.4	8932.0
14.4140	10743.0	11165.2	-17800.2	8923.2
14.4337	10412.0	10596.3	-17562.3	8914.4
14.4534	10315.0	10315.5	-17378.5	8905.6
14.4731	10151.0	10197.2	-17424.2	8896.8
14.4929	10139.0	10144.1	-17383.1	8888.0
14.5126	9917.0	10113.3	-17574.3	8879.2
14.5323	10066.0	10090.6	-17402.6	8870.5
14.5520	9968.0	10071.8	-17481.8	8861.7
14.5717	10038.0	10055.6	-17395.6	8852.9
14.5914	9938.0	10041.1	-17481.1	8844.1
14.6111	9975.0	10027.9	-17430.9	8835.3
14.6308	9937.0	10015.5	-17456.5	8826.6
14.6505	9912.0	10003.8	-17469.8	8817.8
14.6702	10075.0	9992.7	-17295.7	8809.0
14.6899	9885.0	9981.9	-17474.9	8800.2
14.7096	9979.0	9971.5	-17370.5	8791.4
14.7293	9844.0	9961.3	-17495.3	8782.7
14.7490	9757.0	9951.3	-17572.3	8773.9
14.7687	10087.0	9941.5	-17232.5	8765.1
14.7884	9999.0	9931.8	-17310.8	8756.3
14.8081	9834.0	9922.3	-17466.3	8747.6
14.8278	9836.0	9912.8	-17454.8	8738.8
14.8476	10054.0	9903.4	-17227.4	8730.0
14.8673	9860.0	9894.1	-17412.1	8721.2
14.8870	9869.0	9884.8	-17393.8	8712.4
14.9067	9889.0	9875.6	-17364.6	8703.6
14.9264	9808.0	9866.4	-17436.4	8694.8
14.9461	9683.0	9857.3	-17552.3	8686.1
14.9658	9780.0	9848.2	-17446.2	8677.3
14.9855	9848.0	9839.2	-17369.2	8668.5
15.0052	9871.0	9830.1	-17337.1	8659.7
15.0249	9868.0	9817.2	-17327.2	8650.9
15.0446	9727.0	9808.5	-17459.5	8642.2
15.0643	9820.0	9799.7	-17357.7	8633.4
15.0840	9851.0	9790.9	-17317.9	8624.6
15.1037	9794.0	9782.1	-17366.1	8615.8
15.1234	9751.0	9773.4	-17400.4	8607.0
15.1431	9932.0	9764.6	-17210.6	8598.3
15.1628	9810.0	9755.8	-17323.8	8589.5
15.1825	9668.0	9747.0	-17457.0	8580.7
15.2023	9483.0	9738.2	-17633.2	8571.9
15.2220	9714.0	9729.4	-17393.4	8563.1
15.2417	9640.0	9720.6	-17458.6	8554.3
15.2614	9673.0	9711.9	-17416.9	8545.6
15.2811	9909.0	9703.1	-17172.1	8536.8
15.3008	9621.0	9694.3	-17451.3	8528.0
15.3205	9670.0	9685.5	-17393.5	8519.2
15.3402	9726.0	9676.7	-17328.7	8510.4
15.3599	9593.0	9668.0	-17453.0	8501.7
15.3796	9607.0	9659.2	-17430.2	8492.9
15.3993	9689.0	9650.4	-17339.4	8484.1
15.4190	9557.0	9641.6	-17462.6	8475.3
15.4387	9624.0	9632.8	-17386.8	8466.5
15.4584	9613.0	9624.1	-17389.1	8457.8
15.4781	9738.0	9615.3	-17255.3	8449.0
15.4978	9490.0	9606.5	-17494.5	8440.2
15.5175	9466.0	9597.7	-17509.7	8431.4
15.5372	9598.0	9589.0	-17369.0	8422.6
15.5570	9680.0	9580.1	-17278.1	8413.8
15.5767	9666.0	9571.4	-17283.4	8405.0
15.5964	9687.0	9562.6	-17253.6	8396.3
15.6161	9505.0	9553.8	-17426.8	8387.5
15.6358	9711.0	9545.0	-17212.0	8378.7
15.6555	9568.0	9536.2	-17346.2	8369.9
15.6752	9655.0	9527.5	-17250.5	8361.2
15.6949	9409.0	9518.7	-17487.7	8352.4
15.7146	9449.0	9509.9	-17438.9	8343.6
15.7343	9499.0	9501.1	-17380.1	8334.8
15.7540	9628.0	9492.3	-17242.3	8326.0
15.7737	9328.0	9483.6	-17533.6	8317.3
15.7934	9392.0	9474.8	-17460.8	8308.5
15.8131	9654.0	9466.0	-17190.0	8299.7
15.8328	9513.0	9457.2	-17322.2	8290.9
15.8525	9287.0	9448.5	-17539.4	8282.1
15.8722	9525.0	9438.4	-17291.4	8272.0
15.8919	9669.0	9428.3	-17137.3	8262.0
15.9117	9417.0	9418.1	-17379.1	8251.8
15.9314	9510.0	9408.0	-17276.0	8241.7
15.9511	9416.0	9397.9	-17359.9	8231.6
15.9708	9433.0	9387.8	-17332.8	8221.5
15.9905	9462.0	9377.8	-17293.8	8211.4
16.0102	9316.0	9367.7	-17429.7	8201.4
16.0299	9490.0	9357.6	-17245.6	8191.3
16.0496	9426.0	9347.5	-17299.5	8181.2
16.0693	9361.0	9337.4	-17354.4	8171.1
16.0890	9297.0	9327.3	-17408.3	8161.0
16.1087	9335.0	9317.2	-17360.2	8150.9
16.1284	9185.0	9307.1	-17500.1	8140.8
16.1481	9369.0	9297.0	-17306.0	8130.7
16.1678	9368.0	9286.9	-17296.9	8120.6
16.1875	9382.0	9276.8	-17272.8	8110.5
16.2072	9175.0	9266.7	-17469.7	8100.4
16.2269	9138.0	9256.6	-17496.6	8090.3
16.2466	9204.0	9246.6	-17420.6	8080.2
16.2663	9326.0	9236.5	-17288.5	8070.2
16.2861	9055.0	9226.3	-17549.3	8060.0
16.3058	9063.0	9216.2	-17531.2	8049.9
16.3255	9133.0	9206.1	-17451.1	8039.8
16.3452	9238.0	9196.0	-17336.0	8029.7
16.3649	9243.0	9185.9	-17320.9	8019.6
16.3846	9199.0	9175.9	-17354.9	8009.5
16.4043	9059.0	9165.8	-17484.8	7999.5
16.4240	9184.0	9155.7	-17349.7	7989.4
16.4437	9253.0	9145.6	-17270.6	7979.3
16.4634	9185.0	9135.5	-17328.5	7969.2
16.4831	9073.0	9125.4	-17430.4	7959.1
16.5028	9028.0	9115.3	-17465.3	7949.0
16.5225	9124.0	9105.2	-17359.2	7938.9
16.5422	9203.0	9095.1	-17270.1	7928.8
16.5619	9167.0	9085.0	-17296.0	7918.7
16.5816	9138.0	9074.9	-17314.9	7908.6
16.6013	9045.0	9064.8	-17397.8	7898.5
16.6210	9210.0	9054.7	-17222.7	7888.4
16.6408	9004.0	9044.6	-17418.6	7878.3
16.6605	9239.0	9034.5	-17173.5	7868.2
16.6802	8974.0	9024.4	-17428.4	7858.1
16.6999	8941.0	9014.3	-17451.3	7848.0
16.7196	9072.0	9004.2	-17310.2	7837.9
16.7393	9115.0	8994.1	-17257.1	7827.8
16.7590	8961.0	8984.0	-17401.0	7817.7
16.7787	8750.0	8974.0	-17602.0	7807.6
16.7984	8866.0	8963.9	-17475.9	7797.6
16.8181	8956.0	8953.8	-17375.8	7787.5
16.8378	8810.0	8943.7	-17511.7	7777.4
16.8575	9061.0	8933.6	-17250.6	7767.3
16.8772	9015.0	8923.5	-17286.5	7757.2
16.8969	8877.0	8913.4	-17414.4	7747.1
16.9166	8948.0	8903.3	-17333.3	7737.0
16.9363	8820.0	8893.2	-17451.2	7726.9
16.9560	8835.0	8883.1	-17426.1	7716.8
16.9757	8849.0	8873.0	-17402.0	7706.7
16.9955	8973.0	8862.9	-17267.9	7696.6
17.0152	8831.0	8852.8	-17399.8	7686.5
17.0349	8932.0	8842.7	-17288.7	7676.4
17.0546	8685.0	8832.6	-17525.6	7666.3
17.0743	8973.0	8822.5	-17227.5	7656.2
17.0940	8941.0	8812.4	-17249.4	7646.1
17.1137	8951.0	8802.3	-17229.3	7636.0
17.1334	8753.0	8792.2	-17417.2	7625.9
17.1531	8769.0	8782.1	-17391.1	7615.8
17.1728	8727.0	8772.1	-17423.1	7605.7
17.1925	8728.0	8762.0	-17412.0	7595.7
17.2122	8911.0	8751.9	-17218.9	7585.6
17.2319	8607.0	8741.8	-17512.8	7575.5
17.2516	8598.0	8731.7	-17511.7	7565.4
17.2713	8705.0	8723.2	-17396.2	7556.9
17.2910	8823.0	8714.7	-17269.7	7548.4
17.3107	8683.0	8706.2	-17401.2	7539.9
17.3304	8694.0	8697.7	-17381.7	7531.4
17.3502	8738.0	8689.1	-17329.1	7522.8
17.3699	8670.0	8680.6	-17388.6	7514.3
17.3896	8741.0	8672.1	-17309.1	7505.8
17.4093	8730.0	8663.6	-17311.6	7497.3
17.4290	8606.0	8655.1	-17427.1	7488.8
17.4487	8578.0	8646.6	-17446.6	7480.3
17.4684	8619.0	8638.1	-17397.1	7471.8
17.4881	8616.0	8629.6	-17391.6	7463.3
17.5078	8613.0	8621.1	-17386.1	7454.8
17.5275	8453.0	8612.6	-17537.6	7446.3
17.5472	8355.0	8604.1	-17627.1	7437.8
17.5669	8677.0	8595.6	-17296.6	7429.3
17.5866	8538.0	8587.1	-17427.1	7420.8
17.6063	8654.0	8578.6	-17302.6	7412.3
17.6260	8611.0	8570.1	-17337.1	7403.8
17.6457	8466.0	8561.6	-17473.6	7395.3
17.6654	8605.0	8553.1	-17326.1	7386.8
17.6851	8482.0	8544.6	-17440.6	7378.3
17.7049	8624.0	8536.1	-17290.1	7369.8
17.7246	8613.0	8527.6	-17292.6	7361.3
17.7443	8731.0	8519.1	-17166.1	7352.8
17.7640	8401.0	8510.6	-17487.6	7344.3
17.7837	8366.0	8502.1	-17514.1	7335.8
17.8034	8408.0	8493.6	-17463.6	7327.3
17.8231	8406.0	8485.1	-17457.1	7318.8
17.8428	8601.0	8476.6	-17253.6	7310.3
17.8625	8502.0	8468.1	-17344.1	7301.8
17.8822	8479.0	8459.6	-17358.6	7293.3
17.9019	8520.0	8451.1	-17309.1	7284.8
17.9216	8572.0	8442.6	-17248.6	7276.3
17.9413	8496.0	8434.1	-17316.1	7267.8
17.9610	8513.0	8425.6	-17290.6	7259.3
17.9807	8310.0	8417.1	-17485.1	7250.8
18.0004	8276.0	8408.6	-17510.6	7242.3
18.0201	8319.0	8400.1	-17459.1	7233.8
18.0398	8414.0	8391.6	-17355.6	7225.3
18.0595	8202.0	8383.1	-17559.1	7216.8
18.0793	8181.0	8374.5	-17571.5	7208.2
18.0990	8321.0	8366.0	-17423.0	7199.7
18.1187	8339.0	8357.5	-17396.5	7191.2
18.1384	8234.0	8349.0	-17493.0	7182.7
18.1581	8278.0	8340.5	-17440.5	7174.2
18.1778	8337.0	8332.0	-17373.0	7165.7
18.1975	8304.0	8323.5	-17397.5	7157.2
18.2172	8382.0	8315.0	-17311.0	7148.7
18.2369	8427.0	8306.5	-17257.5	7140.2
18.2566	8333.0	8298.0	-17343.0	7131.7
18.2763	8418.0	8289.5	-17249.5	7123.2
18.2960	8443.0	8281.0	-17216.0	7114.7
18.3157	8270.0	8272.5	-17380.5	7106.2
18.3354	8239.0	8264.0	-17403.0	7097.7
18.3551	8280.0	8255.5	-17353.5	7089.2
18.3748	8368.0	8247.0	-17257.0	7080.7
18.3945	8196.0	8238.5	-17420.5	7072.2
18.4142	8256.0	8230.0	-17352.0	7063.7
18.4340	8243.0	8221.5	-17356.5	7055.2
18.4537	8266.0	8213.0	-17325.0	7046.7
18.4734	8049.0	8204.5	-17533.5	7038.2
18.4931	8225.0	8196.0	-17349.0	7029.7
18.5128	8221.0	8187.5	-17344.5	7021.2
18.5325	8244.0	8179.0	-17313.0	7012.7
18.5522	8185.0	8170.5	-17363.5	7004.2
18.5719	8173.0	8162.0	-17367.0	6995.7
18.5916	8270.0	8153.5	-17261.5	6987.2
18.6113	8164.0	8145.0	-17359.0	6978.7
18.6310	8357.0	8136.5	-17157.5	6970.2
18.6507	8117.0	8128.0	-17389.0	6961.7
18.6704	8175.0	8119.5	-17322.5	6953.2
18.6901	8191.0	8111.0	-17298.0	6944.7
18.7098	8112.0	8102.5	-17368.5	6936.2
18.7295	8099.0	8094.0	-17373.0	6927.7
18.7492	8088.0	8085.5	-17375.5	6919.2
18.7689	7887.0	8077.0	-17568.0	6910.7
18.7887	8139.0	8070.2	-17309.2	6903.9
18.8084	7937.0	8063.5	-17504.5	6897.2
18.8281	7982.0	8056.8	-17452.8	6890.5
18.8478	7971.0	8050.1	-17457.1	6883.8
18.8675	8053.0	8043.4	-17368.4	6877.1
18.8872	8071.0	8036.7	-17343.7	6870.4
18.9069	8057.0	8029.9	-17350.9	6863.6
18.9266	8011.0	8023.2	-17390.2	6856.9
18.9463	8115.0	8016.5	-17279.5	6850.2
18.9660	8065.0	8009.8	-17322.8	6843.5
18.9857	7924.0	8003.1	-17457.1	6836.8
19.0054	7896.0	7996.4	-17478.4	6830.1
19.0251	8021.0	7989.7	-17346.7	6823.3
19.0448	8018.0	7982.9	-17342.9	6816.6
19.0645	8041.0	7976.2	-17313.2	6809.9
19.0842	8047.0	7969.5	-17300.5	6803.2
19.1039	8057.0	7962.8	-17283.8	6796.5
19.1236	8040.0	7956.1	-17294.1	6789.8
19.1434	7937.0	7949.3	-17390.3	6783.0
19.1631	7876.0	7942.6	-17444.6	6776.3
19.1828	8008.0	7935.9	-17305.9	6769.6
19.2025	7865.0	7929.2	-17442.2	6762.9
19.2222	7829.0	7922.5	-17471.5	6756.2
19.2419	8059.0	7915.7	-17234.7	6749.4
19.2616	7869.0	7909.0	-17418.0	6742.7
19.2813	7829.0	7902.3	-17451.3	6736.0
19.3010	7856.0	7895.6	-17417.6	6729.3
19.3207	7723.0	7888.9	-17543.9	6722.6
19.3404	7645.0	7882.2	-17615.2	6715.9
19.3601	7861.0	7875.5	-17392.5	6709.1
19.3798	7879.0	7868.7	-17367.7	6702.4
19.3995	7799.0	7862.0	-17441.0	6695.7
19.4192	7775.0	7855.3	-17458.3	6689.0
19.4389	7904.0	7848.6	-17322.6	6682.3
19.4586	7789.0	7841.9	-17430.9	6675.6
19.4783	7853.0	7835.2	-17360.2	6668.9
19.4981	7900.0	7828.4	-17306.4	6662.1
19.5178	7804.0	7821.7	-17395.7	6655.4
19.5375	7769.0	7815.0	-17424.0	6648.7
19.5572	7831.0	7808.3	-17355.3	6642.0
19.5769	7893.0	7801.6	-17286.6	6635.2
19.5966	7794.0	7794.8	-17378.8	6628.5
19.6163	7808.0	7788.1	-17358.1	6621.8
19.6360	7806.0	7781.4	-17353.4	6615.1
19.6557	7814.0	7774.7	-17338.7	6608.4
19.6754	7664.0	7768.0	-17482.0	6601.7
19.6951	7612.0	7761.3	-17527.3	6595.0
19.7148	7625.0	7754.5	-17507.5	6588.2
19.7345	7713.0	7747.8	-17412.8	6581.5
19.7542	7794.0	7741.1	-17325.1	6574.8
19.7739	7763.0	7734.4	-17349.4	6568.1
19.7936	7710.0	7727.7	-17395.7	6561.4
19.8133	7820.0	7721.0	-17279.0	6554.7
19.8330	7713.0	7714.3	-17379.2	6547.9
19.8528	7662.0	7707.5	-17423.5	6541.2
19.8725	7548.0	7700.8	-17530.8	6534.5
19.8922	7759.0	7694.1	-17313.1	6527.8
19.9119	7662.0	7687.4	-17403.4	6521.0
19.9316	7618.0	7680.6	-17440.6	6514.3
19.9513	7724.0	7673.9	-17327.9	6507.6
19.9710	7743.0	7667.2	-17302.2	6500.9
19.9907	7687.0	7660.5	-17351.5	6494.2
20.0104	7646.0	7653.8	-17385.8	6487.5
20.0301	7756.0	7647.1	-17269.1	6480.8
20.0498	7610.0	7640.3	-17408.3	6474.0
20.0695	7839.0	7633.6	-17172.6	6467.3
20.0892	7619.0	7626.9	-17385.9	6460.6
20.1089	7653.0	7620.2	-17345.2	6453.9
20.1286	7608.0	7613.5	-17383.5	6447.2
20.1483	7630.0	7606.8	-17354.8	6440.5
20.1680	7662.0	7600.1	-17316.1	6433.7
20.1877	7610.0	7593.3	-17361.3	6427.0
20.2074	7629.0	7586.6	-17335.6	6420.3
20.2272	7634.0	7579.9	-17323.9	6413.6
20.2469	7337.0	7573.2	-17614.2	6406.9
20.2666	7651.0	7567.8	-17294.8	6401.5
20.2863	7658.0	7562.5	-17282.5	6396.2
20.3060	7499.0	7557.1	-17436.1	6390.8
20.3257	7645.0	7551.8	-17284.8	6385.5
20.3454	7646.0	7546.5	-17278.5	6380.2
20.3651	7455.0	7541.1	-17464.1	6374.8
20.3848	7512.0	7535.8	-17401.8	6369.5
20.4045	7568.0	7530.5	-17340.5	6364.2
20.4242	7585.0	7525.1	-17318.1	6358.8
20.4439	7435.0	7519.8	-17462.8	6353.5
20.4636	7673.0	7514.4	-17219.4	6348.1
20.4833	7470.0	7509.1	-17417.1	6342.8
20.5030	7354.0	7503.8	-17527.8	6337.5
20.5227	7641.0	7498.4	-17235.4	6332.1
20.5424	7425.0	7493.1	-17446.1	6326.8
20.5621	7519.0	7487.8	-17346.8	6321.4
20.5819	7374.0	7482.4	-17486.4	6316.1
20.6016	7508.0	7477.1	-17347.1	6310.7
20.6213	7477.0	7471.7	-17372.7	6305.4
20.6410	7367.0	7466.4	-17477.4	6300.1
20.6607	7504.0	7461.0	-17335.0	6294.7
20.6804	7594.0	7455.7	-17239.7	6289.4
20.7001	7378.0	7450.4	-17450.4	6284.1
20.7198	7395.0	7445.0	-17428.0	6278.7
20.7395	7410.0	7439.7	-17407.7	6273.4
20.7592	7462.0	7434.4	-17350.4	6268.0
20.7789	7479.0	7429.0	-17328.0	6262.7
20.7986	7516.0	7423.7	-17285.7	6257.4
20.8183	7347.0	7418.3	-17449.3	6252.0
20.8380	7279.0	7413.0	-17512.0	6246.7
20.8577	7411.0	7407.7	-17374.7	6241.4
20.8774	7331.0	7402.3	-17449.3	6236.0
20.8971	7281.0	7397.0	-17494.0	6230.7
20.9168	7445.0	7391.7	-17324.7	6225.3
20.9366	7406.0	7386.3	-17358.3	6220.0
20.9563	7362.0	7380.9	-17396.9	6214.6
20.9760	7342.0	7375.6	-17411.6	6209.3
20.9957	7444.0	7370.3	-17304.3	6204.0
21.0154	7439.0	7364.9	-17303.9	6198.6
21.0351	7373.0	7359.6	-17364.6	6193.3
21.0548	7594.0	7354.3	-17138.3	6188.0
21.0745	7411.0	7348.9	-17315.9	6182.6
21.0942	7308.0	7343.6	-17413.6	6177.3
21.1139	7194.0	7338.2	-17522.2	6171.9
21.1336	7168.0	7332.9	-17542.9	6166.6
21.1533	7186.0	7327.6	-17519.6	6161.3
21.1730	7408.0	7322.2	-17292.2	6155.9
21.1927	7320.0	7316.9	-17374.9	6150.6
21.2124	7336.0	7311.6	-17353.6	6145.2
21.2321	7330.0	7306.2	-17354.2	6139.9
21.2518	7203.0	7300.9	-17475.9	6134.6
21.2715	7291.0	7295.5	-17382.5	6129.2
21.2913	7292.0	7290.2	-17376.2	6123.9
21.3110	7348.0	7284.8	-17314.8	6118.5
21.3307	7235.0	7279.5	-17422.5	6113.2
21.3504	7248.0	7274.2	-17404.2	6107.9
21.3701	7202.0	7268.8	-17444.8	6102.5
21.3898	7348.0	7263.5	-17293.5	6097.2
21.4095	7294.0	7258.2	-17342.2	6091.8
21.4292	7075.0	7252.8	-17555.8	6086.5
21.4489	7116.0	7247.5	-17509.5	6081.2
21.4686	7337.0	7242.1	-17283.1	6075.8
21.4883	7365.0	7236.8	-17249.8	6070.5
21.5080	7312.0	7231.5	-17297.5	6065.2
21.5277	7516.0	7226.1	-17088.1	6059.8
21.5474	7318.0	7220.8	-17280.8	6054.5
21.5671	7174.0	7215.5	-17419.5	6049.1
21.5868	7195.0	7210.1	-17393.1	6043.8
21.6065	7125.0	7204.8	-17457.8	6038.5
21.6262	7141.0	7199.4	-17436.4	6033.1
21.6460	7157.0	7194.1	-17415.1	6027.8
21.6657	7259.0	7188.7	-17307.7	6022.4
21.6854	7033.0	7183.4	-17528.4	6017.1
21.7051	7220.0	7178.1	-17336.1	6011.8
21.7248	6996.0	7172.7	-17554.7	6006.4
21.7445	7271.0	7168.3	-17275.3	6002.0
21.7642	7085.0	7163.9	-17456.9	5997.6
21.7839	7198.0	7159.5	-17339.5	5993.1
21.8036	7169.0	7155.0	-17364.0	5988.7
21.8233	7145.0	7150.6	-17383.6	5984.3
21.8430	7132.0	7146.2	-17392.2	5979.9
21.8627	7121.0	7141.8	-17398.8	5975.4
21.8824	7123.0	7137.3	-17392.3	5971.0
21.9021	7109.0	7132.9	-17401.9	5966.6
21.9218	7243.0	7128.5	-17263.5	5962.2
21.9415	7203.0	7124.1	-17299.1	5957.8
21.9612	7171.0	7119.6	-17326.6	5953.3
21.9809	7185.0	7115.2	-17308.2	5948.9
22.0006	7117.0	7110.8	-17371.8	5944.5
22.0204	7245.0	7106.3	-17239.3	5940.0
22.0401	7131.0	7101.9	-17348.9	5935.6
22.0598	7188.0	7097.5	-17287.5	5931.2
22.0795	7111.0	7093.1	-17360.1	5926.8
22.0992	6951.0	7088.6	-17515.6	5922.3
22.1189	6977.0	7084.2	-17485.2	5917.9
22.1386	7191.0	7079.8	-17266.8	5913.5
22.1583	7023.0	7075.4	-17430.4	5909.1
22.1780	7042.0	7071.0	-17406.9	5904.6
22.1977	7216.0	7066.5	-17228.5	5900.2
22.2174	6872.0	7062.1	-17568.1	5895.8
22.2371	6969.0	7057.7	-17466.7	5891.4
22.2568	7145.0	7053.3	-17286.3	5886.9
22.2765	7028.0	7048.8	-17398.8	5882.5
22.2962	6895.0	7044.4	-17527.4	5878.1
22.3159	7082.0	7040.0	-17336.0	5873.7
22.3356	7010.0	7035.6	-17403.6	5869.3
22.3553	7123.0	7031.1	-17286.1	5864.8
22.3751	7064.0	7026.7	-17340.7	5860.4
22.3948	7033.0	7022.3	-17367.3	5856.0
22.4145	7163.0	7017.8	-17232.8	5851.5
22.4342	6987.0	7013.4	-17404.4	5847.1
22.4539	6984.0	7009.0	-17403.0	5842.7
22.4736	6823.0	7004.6	-17559.6	5838.3
22.4933	6994.0	7000.1	-17384.1	5833.8
22.5130	7105.0	6995.7	-17268.7	5829.4
22.5327	7001.0	6991.3	-17368.3	5825.0
22.5524	7098.0	6986.9	-17266.9	5820.6
22.5721	6890.0	6982.4	-17470.4	5816.1
22.5918	6962.0	6978.0	-17394.0	5811.7
22.6115	6880.0	6973.6	-17471.6	5807.3
22.6312	6976.0	6969.2	-17371.2	5802.9
22.6509	7049.0	6964.8	-17293.8	5798.4
22.6706	6916.0	6960.3	-17422.3	5794.0
22.6903	6916.0	6955.9	-17417.9	5789.6
22.7100	6987.0	6951.5	-17342.5	5785.2
22.7298	6796.0	6947.0	-17529.0	5780.7
22.7495	6984.0	6942.6	-17336.6	5776.3
22.7692	6928.0	6938.2	-17388.2	5771.9
22.7889	6939.0	6933.8	-17372.8	5767.5
22.8086	6964.0	6929.3	-17343.3	5763.0
22.8283	6962.0	6924.9	-17340.9	5758.6
22.8480	6956.0	6920.5	-17342.5	5754.2
22.8677	6934.0	6916.1	-17360.1	5749.8
22.8874	7004.0	6911.6	-17285.6	5745.3
22.9071	6928.0	6907.2	-17357.2	5740.9
22.9268	6803.0	6902.8	-17477.8	5736.5
22.9465	6827.0	6898.4	-17449.4	5732.1
22.9662	6867.0	6893.9	-17404.9	5727.6
22.9859	6842.0	6889.5	-17425.5	5723.2
23.0056	6766.0	6885.1	-17497.1	5718.8
23.0253	6903.0	6880.7	-17355.7	5714.4
23.0450	6888.0	6876.3	-17366.2	5709.9
23.0647	6867.0	6871.8	-17382.8	5705.5
23.0845	6797.0	6867.4	-17448.4	5701.1
23.1042	7024.0	6863.0	-17217.0	5696.6
23.1239	6873.0	6858.5	-17363.5	5692.2
23.1436	6924.0	6854.1	-17308.1	5687.8
23.1633	6836.0	6849.7	-17391.7	5683.4
23.1830	6856.0	6845.3	-17367.3	5679.0
23.2027	6947.0	6840.8	-17271.8	5674.5
23.2224	6843.0	6836.4	-17371.4	5670.1
23.2421	6783.0	6832.0	-17427.0	5665.7
23.2618	6850.0	6827.6	-17355.6	5661.3
23.2815	6806.0	6823.1	-17395.1	5656.8
23.3012	6937.0	6818.7	-17259.7	5652.4
23.3209	6852.0	6814.3	-17340.3	5648.0
23.3406	6704.0	6809.9	-17483.9	5643.6
23.3603	6932.0	6805.3	-17251.3	5639.0
23.3800	6907.0	6800.7	-17271.7	5634.4
23.3997	6793.0	6796.1	-17381.1	5629.8
23.4194	6827.0	6791.5	-17342.5	5625.2
23.4392	6760.0	6786.9	-17404.9	5620.6
23.4589	6728.0	6782.3	-17432.3	5616.0
23.4786	6808.0	6777.7	-17347.7	5611.4
23.4983	6667.0	6773.1	-17484.1	5606.8
23.5180	6844.0	6768.5	-17302.5	5602.2
23.5377	6658.0	6763.9	-17483.9	5597.6
23.5574	6839.0	6759.3	-17298.3	5593.0
23.5771	6743.0	6754.7	-17389.7	5588.4
23.5968	6613.0	6750.1	-17515.1	5583.8
23.6165	6637.0	6745.5	-17486.5	5579.2
23.6362	6845.0	6740.9	-17273.9	5574.6
23.6559	6780.0	6736.3	-17334.3	5570.0
23.6756	6674.0	6731.7	-17435.7	5565.4
23.6953	6886.0	6727.1	-17219.1	5560.8
23.7150	6585.0	6722.5	-17515.6	5556.2
23.7347	6658.0	6718.0	-17438.0	5551.6
23.7544	6685.0	6713.4	-17406.4	5547.1
23.7741	6698.0	6708.8	-17388.8	5542.5
23.7938	6678.0	6704.2	-17404.2	5537.9
23.8136	6768.0	6699.6	-17309.6	5533.2
23.8333	6789.0	6695.0	-17284.0	5528.7
23.8530	6671.0	6690.4	-17397.4	5524.1
23.8727	6772.0	6685.8	-17291.8	5519.5
23.8924	6580.0	6681.2	-17479.2	5514.9
23.9121	6657.0	6676.6	-17397.6	5510.3
23.9318	6654.0	6691.2	-17415.2	5505.7
23.9515	6670.0	6687.8	-17395.8	5501.1
23.9712	6739.0	6684.5	-17323.5	5496.5
23.9909	6692.0	6681.4	-17367.4	5491.9
24.0106	6657.0	6678.4	-17399.4	5487.3
24.0303	6649.0	6675.6	-17404.6	5482.7
24.0500	6675.0	6672.9	-17375.9	5478.1
24.0697	6764.0	6670.6	-17284.6	5473.5
24.0894	6937.0	6668.4	-17109.4	5468.9
24.1091	6776.0	6666.6	-17268.6	5464.3
24.1288	6596.0	6665.2	-17447.2	5459.7
24.1485	6880.0	6664.2	-17162.2	5455.1
24.1683	6697.0	6663.6	-17344.6	5450.5
24.1880	6713.0	6663.8	-17328.8	5445.9
24.2077	6652.0	6664.6	-17390.6	5441.3
24.2274	6716.0	6666.4	-17328.4	5436.7
24.2471	6709.0	6669.2	-17338.2	5432.1
24.2668	6736.0	6673.5	-17315.5	5427.5
24.2865	6653.0	6679.5	-17404.5	5423.0
24.3062	6687.0	6687.8	-17378.8	5418.4
24.3259	6632.0	6699.0	-17445.0	5413.8
24.3456	6687.0	6714.1	-17405.1	5409.2
24.3653	6663.0	6734.5	-17449.5	5404.6
24.3850	6694.0	6762.1	-17446.1	5400.0
24.4047	6783.0	6800.1	-17395.1	5395.4
24.4244	6863.0	6854.0	-17369.0	5390.8
24.4441	6980.0	6936.7	-17334.7	5386.2
24.4638	7071.0	7088.2	-17395.2	5381.6
24.4835	7374.0	7430.1	-17434.1	5377.0
24.5032	8285.0	8250.3	-17343.3	5372.4
24.5230	9617.0	9999.2	-17760.2	5367.8
24.5427	12177.0	12901.4	-18102.4	5363.2
24.5624	15733.0	16353.7	-17998.7	5358.6
24.5821	17925.0	18421.7	-17874.7	5354.0
24.6018	16810.0	17219.2	-17787.2	5349.4
24.6215	13206.0	13909.9	-18081.9	5344.8
24.6412	10226.0	10716.5	-17868.5	5340.2
24.6609	8377.0	8621.5	-17622.5	5335.6
24.6806	7617.0	7563.8	-17324.8	5331.0
24.7003	7292.0	7108.1	-17194.1	5326.4
24.7200	6881.0	6908.9	-17405.9	5321.9
24.7397	6671.0	6802.7	-17509.7	5317.3
24.7594	6655.0	6732.9	-17455.9	5312.7
24.7791	6751.0	6681.7	-17308.7	5308.1
24.7988	6629.0	6642.2	-17391.2	5303.5
24.8185	6703.0	6610.7	-17285.7	5298.9
24.8382	6558.0	6585.0	-17405.0	5294.3
24.8579	6599.0	6566.5	-17345.5	5292.7
24.8777	6366.0	6551.1	-17563.1	5291.0
24.8974	6480.0	6538.3	-17436.3	5289.4
24.9171	6517.0	6527.3	-17388.3	5287.7
24.9368	6528.0	6517.8	-17367.8	5286.1
24.9565	6647.0	6509.5	-17240.5	5284.5
24.9762	6525.0	6502.2	-17355.2	5282.8
24.9959	6580.0	6495.6	-17293.6	5281.2
25.0156	6593.0	6489.8	-17274.8	5279.6
25.0353	6449.0	6484.4	-17413.4	5277.9
25.0550	6699.0	6479.5	-17158.5	5276.3
25.0747	6547.0	6475.0	-17306.0	5274.7
25.0944	6541.0	6470.8	-17307.8	5273.0
25.1141	6671.0	6466.9	-17173.9	5271.4
25.1338	6461.0	6463.2	-17380.2	5269.8
25.1535	6510.0	6459.7	-17327.7	5268.1
25.1732	6578.0	6456.4	-17256.4	5266.5
25.1929	6510.0	6453.3	-17321.3	5264.9
25.2126	6482.0	6450.3	-17346.3	5263.2
25.2324	6508.0	6447.4	-17317.4	5261.6
25.2521	6506.0	6444.6	-17316.7	5259.9
25.2718	6507.0	6424.6	-17295.6	5258.3
25.2915	6528.0	6423.0	-17273.0	5256.7
25.3112	6414.0	6421.4	-17385.4	5255.0
25.3309	6508.0	6419.7	-17289.7	5253.4
25.3506	6478.0	6418.1	-17318.1	5251.8
25.3703	6467.0	6416.4	-17327.4	5250.1
25.3900	6478.0	6414.8	-17314.8	5248.5
25.4097	6290.0	6413.2	-17501.2	5246.9
25.4294	6464.0	6411.5	-17325.5	5245.2
25.4491	6423.0	6409.9	-17364.9	5243.6
25.4688	6557.0	6408.3	-17229.3	5242.0
25.4885	6317.0	6406.6	-17467.6	5240.3
25.5082	6371.0	6405.0	-17412.0	5238.7
25.5279	6614.0	6403.4	-17167.4	5237.1
25.5476	6460.0	6401.7	-17319.7	5235.4
25.5673	6436.0	6400.1	-17342.1	5233.8
25.5871	6334.0	6398.5	-17442.5	5232.2
25.6068	6511.0	6396.8	-17263.8	5230.5
25.6265	6530.0	6395.2	-17243.2	5228.9
25.6462	6532.0	6393.6	-17239.6	5227.2
25.6659	6590.0	6391.9	-17179.9	5225.6
25.6856	6356.0	6390.3	-17412.3	5224.0
25.7053	6333.0	6388.7	-17433.7	5222.3
25.7250	6624.0	6387.0	-17141.0	5220.7
25.7447	6408.0	6385.4	-17355.4	5219.1
25.7644	6534.0	6383.8	-17227.8	5217.4
25.7841	6351.0	6382.1	-17409.1	5215.8
25.8038	6394.0	6380.5	-17364.5	5214.2
25.8235	6276.0	6378.8	-17480.8	5212.5
25.8432	6437.0	6377.2	-17318.2	5210.9
25.8629	6392.0	6375.6	-17361.6	5209.3
25.8826	6215.0	6373.9	-17536.9	5207.6
25.9023	6402.0	6372.3	-17348.3	5206.0
25.9220	6450.0	6370.7	-17298.7	5204.4
25.9417	6281.0	6369.0	-17466.0	5202.7
25.9615	6399.0	6367.4	-17346.4	5201.1
25.9812	6394.0	6365.8	-17349.8	5199.5
26.0009	6305.0	6364.1	-17437.1	5197.8
26.0206	6341.0	6362.5	-17399.5	5196.2
26.0403	6279.0	6360.9	-17459.9	5194.6
26.0600	6344.0	6359.2	-17393.2	5192.9
26.0797	6345.0	6357.6	-17390.6	5191.3
26.0994	6320.0	6356.0	-17414.0	5189.6
26.1191	6272.0	6354.3	-17460.3	5188.0
26.1388	6311.0	6352.7	-17419.7	5186.4
26.1585	6321.0	6351.1	-17408.1	5184.7
26.1782	6434.0	6349.4	-17293.4	5183.1
26.1979	6366.0	6347.8	-17359.8	5181.5
26.2176	6476.0	6346.1	-17248.2	5179.8
26.2373	6241.0	6344.5	-17481.5	5178.2
26.2570	6158.0	6342.9	-17562.9	5176.6
26.2767	6505.0	6340.3	-17213.3	5174.0
26.2964	6228.0	6337.7	-17487.7	5171.4
26.3162	6344.0	6335.1	-17369.1	5168.8
26.3359	6329.0	6332.5	-17381.5	5166.2
26.3556	6221.0	6329.9	-17486.9	5163.6
26.3753	6225.0	6327.3	-17480.3	5161.0
26.3950	6384.0	6324.7	-17318.7	5158.4
26.4147	6233.0	6322.1	-17467.1	5155.8
26.4344	6188.0	6319.6	-17509.6	5153.2
26.4541	6303.0	6317.0	-17392.0	5150.7
26.4738	6238.0	6314.4	-17454.4	5148.1
26.4935	6327.0	6311.8	-17362.8	5145.5
26.5132	6250.0	6309.2	-17437.2	5142.9
26.5329	6245.0	6306.6	-17439.6	5140.3
26.5526	6223.0	6304.0	-17459.0	5137.7
26.5723	6308.0	6301.4	-17371.4	5135.1
26.5920	6323.0	6298.8	-17353.8	5132.5
26.6117	6224.0	6296.2	-17450.2	5129.9
26.6314	6203.0	6293.7	-17468.7	5127.4
26.6511	6233.0	6291.1	-17436.1	5124.8
26.6709	6269.0	6288.5	-17397.5	5122.2
26.6906	6302.0	6285.9	-17361.9	5119.6
26.7103	6220.0	6283.3	-17441.3	5117.0
26.7300	6135.0	6280.7	-17523.7	5114.4
26.7497	6257.0	6278.1	-17399.1	5111.8
26.7694	6437.0	6275.5	-17216.5	5109.2
26.7891	6205.0	6272.9	-17445.9	5106.6
26.8088	6369.0	6270.3	-17279.3	5104.0
26.8285	6314.0	6267.7	-17331.7	5101.4
26.8482	6385.0	6265.2	-17258.2	5098.8
26.8679	6348.0	6262.6	-17292.6	5096.3
26.8876	6234.0	6260.0	-17404.0	5093.7
26.9073	6355.0	6257.4	-17280.4	5091.1
26.9270	6224.0	6254.8	-17408.8	5088.5
26.9467	6216.0	6252.2	-17414.2	5085.9
26.9664	6244.0	6249.6	-17383.6	5083.3
26.9861	6214.0	6247.0	-17411.0	5080.7
27.0058	6312.0	6244.4	-17310.4	5078.1
27.0256	6316.0	6241.8	-17303.8	5075.5
27.0453	6260.0	6239.2	-17357.2	5072.9
27.0650	6314.0	6236.7	-17300.7	5070.3
27.0847	6282.0	6234.1	-17330.1	5067.8
27.1044	6123.0	6231.5	-17486.5	5065.2
27.1241	6217.0	6228.9	-17389.9	5062.6
27.1438	6207.0	6226.3	-17397.3	5060.0
27.1635	6150.0	6223.7	-17451.7	5057.4
27.1832	6209.0	6221.1	-17390.1	5054.8
27.2029	6478.0	6218.5	-17118.5	5052.2
27.2226	6273.0	6215.9	-17320.9	5049.6
27.2423	6266.0	6213.3	-17325.3	5047.0
27.2620	6210.0	6210.8	-17378.8	5044.4
27.2817	6291.0	6208.2	-17295.2	5041.9
27.3014	6172.0	6205.6	-17411.6	5039.3
27.3211	6175.0	6203.0	-17406.0	5036.7
27.3408	6181.0	6200.4	-17397.4	5034.1
27.3605	6191.0	6197.8	-17384.8	5031.5
27.3803	6217.0	6195.2	-17356.2	5028.9
27.4000	6250.0	6192.6	-17320.6	5026.3
27.4197	6227.0	6190.0	-17341.0	5023.7
27.4394	6077.0	6187.4	-17488.4	5021.1
27.4591	6122.0	6184.8	-17440.8	5018.5
27.4788	6116.0	6182.2	-17444.2	5015.9
27.4985	6118.0	6179.7	-17439.7	5013.4
27.5182	6075.0	6177.1	-17480.1	5010.8
27.5379	6127.0	6174.5	-17425.5	5008.2
27.5576	6108.0	6171.9	-17441.9	5005.6
27.5773	6155.0	6169.3	-17392.3	5003.0
27.5970	6187.0	6166.7	-17357.7	5000.4
27.6167	6002.0	6164.1	-17540.1	4997.8
27.6364	5995.0	6161.5	-17544.5	4995.2
27.6561	6154.0	6158.9	-17382.9	4992.6
27.6758	5953.0	6156.4	-17581.3	4990.0
27.6955	6235.0	6153.3	-17296.3	4987.0
27.7152	6194.0	6150.3	-17334.3	4984.0
27.7350	6162.0	6147.3	-17363.3	4980.9
27.7547	6223.0	6144.2	-17299.2	4977.9
27.7744	6052.0	6141.2	-17467.2	4974.9
27.7941	6211.0	6138.2	-17305.2	4971.9
27.8138	6089.0	6135.1	-17424.1	4968.8
27.8335	6109.0	6132.1	-17401.1	4965.8
27.8532	6072.0	6129.1	-17435.1	4962.8
27.8729	6048.0	6126.1	-17456.1	4959.8
27.8926	6161.0	6123.0	-17340.0	4956.7
27.9123	6030.0	6120.0	-17468.0	4953.7
27.9320	6172.0	6117.0	-17323.0	4950.7
27.9517	5937.0	6114.0	-17555.0	4947.7
27.9714	6230.0	6110.9	-17258.9	4944.6
27.9911	6138.0	6107.9	-17347.9	4941.6
28.0108	6006.0	6104.9	-17476.9	4938.6
28.0305	6189.0	6101.9	-17290.9	4935.5
28.0502	6149.0	6098.8	-17327.8	4932.5
28.0699	6045.0	6095.8	-17428.8	4929.5
28.0896	6098.0	6092.8	-17372.8	4926.5
28.1094	6133.0	6089.7	-17334.7	4923.4
28.1291	6128.0	6086.7	-17336.7	4920.4
28.1488	6066.0	6083.7	-17395.7	4917.4
28.1685	6192.0	6080.6	-17266.6	4914.3
28.1882	6110.0	6077.6	-17345.6	4911.3
28.2079	6130.0	6074.6	-17322.6	4908.3
28.2276	6052.0	6071.6	-17397.6	4905.3
28.2473	6073.0	6081.5	-17386.5	4902.2
28.2670	6181.0	6079.3	-17276.2	4899.2
28.2867	5968.0	6077.1	-17487.1	4896.2
28.3064	6122.0	6075.0	-17331.0	4893.2
28.3261	6165.0	6073.0	-17286.0	4890.1
28.3458	6024.0	6071.1	-17425.1	4887.1
28.3655	5983.0	6069.3	-17464.3	4884.1
28.3852	6125.0	6067.7	-17320.7	4881.0
28.4049	6163.0	6066.2	-17281.2	4878.0
28.4246	6072.0	6065.0	-17371.0	4875.0
28.4443	6091.0	6063.9	-17350.9	4872.0
28.4641	6017.0	6063.1	-17424.1	4868.9
28.4838	5873.0	6062.5	-17567.5	4865.9
28.5035	6052.0	6062.4	-17388.4	4862.9
28.5232	6071.0	6062.6	-17369.6	4859.8
28.5429	5961.0	6063.4	-17480.4	4856.8
28.5626	6078.0	6064.8	-17364.8	4853.8
28.5823	6063.0	6067.0	-17382.0	4850.8
28.6020	6092.0	6070.1	-17356.1	4847.7
28.6217	6138.0	6074.4	-17314.4	4844.7
28.6414	6087.0	6080.2	-17371.2	4841.7
28.6611	6234.0	6088.0	-17232.0	4838.7
28.6808	6234.0	6098.4	-17242.4	4835.6
28.7005	6277.0	6112.3	-17213.3	4832.6
28.7202	6223.0	6130.9	-17285.9	4829.6
28.7399	6388.0	6156.4	-17146.4	4826.5
28.7596	6324.0	6192.0	-17246.0	4823.5
28.7793	6375.0	6245.3	-17248.3	4820.5
28.7990	6673.0	6337.8	-17042.8	4817.5
28.8188	7057.0	6535.2	-16856.2	4814.4
28.8385	7732.0	6990.9	-16636.9	4811.4
28.8582	8571.0	7959.6	-16766.6	4808.4
28.8779	9867.0	9637.6	-17148.6	4805.3
28.8976	11365.0	11814.3	-17827.3	4802.3
28.9173	12728.0	13516.3	-18166.3	4799.3
28.9370	12665.0	13361.3	-18074.3	4796.3
28.9567	11345.0	11498.0	-17531.0	4793.2
28.9764	9349.0	9346.4	-17375.4	4790.2
28.9961	7810.0	7762.3	-17330.3	4787.2
29.0158	6874.0	6875.3	-17379.3	4784.2
29.0355	6558.0	6463.3	-17283.3	4781.1
29.0552	6192.0	6281.7	-17467.7	4778.1
29.0749	6155.0	6190.7	-17413.7	4775.1
29.0946	5960.0	6134.5	-17552.5	4772.0
29.1143	6054.0	6094.5	-17418.5	4769.0
29.1340	5977.0	6064.1	-17465.1	4766.0
29.1537	5985.0	6040.1	-17433.1	4763.0
29.1735	5900.0	6020.6	-17498.6	4759.9
29.1932	6078.0	6004.6	-17304.6	4756.9
29.2129	5930.0	5991.0	-17439.0	4753.9
29.2326	6080.0	5979.4	-17277.4	4750.8
29.2523	5911.0	5969.2	-17436.2	4747.8
29.2720	5851.0	5960.2	-17487.2	4744.8
29.2917	6019.0	5956.1	-17315.1	4745.8
29.3114	5866.0	5952.8	-17464.8	4746.7
29.3311	5897.0	5950.0	-17431.0	4747.7
29.3508	5887.0	5947.8	-17438.8	4748.7
29.3705	5827.0	5946.0	-17497.0	4749.7
29.3902	5923.0	5944.5	-17399.5	4750.7
29.4099	5770.0	5943.3	-17551.3	4751.6
29.4296	6096.0	5942.3	-17224.3	4752.6
29.4493	5979.0	5941.6	-17340.6	4753.6
29.4690	5814.0	5941.0	-17505.0	4754.6
29.4887	5945.0	5940.6	-17373.6	4755.6
29.5084	6016.0	5940.4	-17302.4	4756.5
29.5282	5825.0	5940.2	-17493.2	4757.5
29.5479	5792.0	5940.2	-17526.2	4758.5
29.5676	5927.0	5940.2	-17391.2	4759.5
29.5873	5852.0	5940.4	-17466.4	4760.4
29.6070	5924.0	5940.6	-17394.6	4761.4
29.6267	5918.0	5928.7	-17388.7	4762.4
29.6464	5907.0	5929.7	-17400.7	4763.4
29.6661	5941.0	5930.7	-17367.7	4764.4
29.6858	5993.0	5931.6	-17316.6	4765.3
29.7055	5976.0	5932.6	-17334.6	4766.3
29.7252	5972.0	5933.6	-17339.6	4767.3
29.7449	6075.0	5934.6	-17237.6	4768.3
29.7646	5946.0	5935.6	-17367.6	4769.3
29.7843	5911.0	5936.5	-17403.5	4770.2
29.8040	5976.0	5937.5	-17339.5	4771.2
29.8237	5953.0	5938.5	-17363.5	4772.2
29.8434	6035.0	5939.5	-17282.5	4773.2
29.8631	5931.0	5940.5	-17387.5	4774.1
29.8828	5941.0	5941.4	-17378.4	4775.1
29.9026	5821.0	5942.4	-17499.4	4776.1
29.9223	5890.0	5943.4	-17431.4	4777.1
29.9420	5977.0	5944.4	-17345.4	4778.1
29.9617	5765.0	5945.4	-17558.4	4779.0
29.9814	5819.0	5946.3	-17505.3	4780.0
30.0011	5791.0	5947.3	-17534.3	4781.0
30.0208	5867.0	5948.3	-17459.3	4782.0
30.0405	5901.0	5949.3	-17426.3	4783.0
30.0602	5918.0	5950.2	-17410.2	4783.9
30.0799	5916.0	5951.2	-17413.2	4784.9
30.0996	5882.0	5952.2	-17448.2	4785.9
30.1193	5998.0	5953.2	-17333.2	4786.9
30.1390	5876.0	5954.2	-17456.2	4787.9
30.1587	5829.0	5955.1	-17504.1	4788.8
30.1784	5958.0	5956.1	-17376.1	4789.8
30.1981	5907.0	5957.1	-17428.1	4790.8
30.2178	5899.0	5958.1	-17437.1	4791.8
30.2375	5838.0	5959.1	-17499.1	4792.7
30.2573	5888.0	5960.0	-17450.0	4793.7
30.2770	5876.0	5961.0	-17463.0	4794.7
30.2967	5744.0	5962.0	-17596.0	4795.7
30.3164	5768.0	5956.2	-17566.2	4789.9
30.3361	5832.0	5950.5	-17496.5	4784.2
30.3558	5972.0	5944.7	-17350.7	4778.4
30.3755	5867.0	5939.0	-17450.0	4772.7
30.3952	5801.0	5933.2	-17510.2	4766.9
30.4149	5868.0	5927.5	-17437.5	4761.2
30.4346	6019.0	5921.7	-17280.7	4755.4
30.4543	5766.0	5916.0	-17528.0	4749.7
30.4740	5941.0	5910.2	-17347.2	4743.9
30.4937	5801.0	5904.5	-17481.5	4738.2
30.5134	5836.0	5898.7	-17440.7	4732.4
30.5331	5875.0	5893.0	-17396.0	4726.7
30.5528	5829.0	5887.2	-17436.2	4720.9
30.5725	5864.0	5881.5	-17395.5	4715.2
30.5922	5876.0	5875.7	-17377.7	4709.4
30.6120	5918.0	5869.9	-17329.9	4703.6
30.6317	5944.0	5864.2	-17298.2	4697.9
30.6514	5968.0	5858.4	-17268.4	4692.1
30.6711	5860.0	5852.7	-17370.7	4686.4
30.6908	5987.0	5846.9	-17237.9	4680.6
30.7105	5877.0	5841.2	-17342.2	4674.9
30.7302	6097.0	5835.4	-17116.4	4669.1
30.7499	6105.0	5829.7	-17102.7	4663.4
30.7696	6084.0	5823.9	-17117.9	4657.6
30.7893	5981.0	5818.2	-17215.2	4651.9
30.8090	6027.0	5812.4	-17163.4	4646.1
30.8287	5962.0	5806.7	-17222.7	4640.4
30.8484	5867.0	5800.9	-17311.9	4634.6
30.8681	5822.0	5795.2	-17351.2	4628.9
30.8878	5850.0	5789.4	-17317.4	4623.1
30.9075	5860.0	5783.7	-17301.7	4617.4
30.9272	5811.0	5777.9	-17344.9	4611.6
30.9469	5919.0	5772.2	-17231.2	4605.9
30.9667	5853.0	5766.4	-17291.4	4600.1
30.9864	5837.0	5760.6	-17301.6	4594.3
31.0061	5850.0	5754.9	-17282.9	4588.6
31.0258	5831.0	5749.1	-17296.1	4582.8
31.0455	5826.0	5743.4	-17295.4	4577.1
31.0652	5913.0	5737.6	-17202.6	4571.3
31.0849	5735.0	5731.9	-17374.9	4565.6
31.1046	5837.0	5726.1	-17267.1	4559.8
31.1243	5725.0	5720.4	-17373.4	4554.1
31.1440	5820.0	5714.6	-17272.6	4548.3
31.1637	5692.0	5708.9	-17394.9	4542.6
31.1834	5759.0	5703.1	-17322.1	4536.8
31.2031	5864.0	5697.4	-17211.4	4531.1
31.2228	5726.0	5691.6	-17343.6	4525.3
31.2425	5725.0	5685.9	-17338.9	4519.6
31.2622	5763.0	5680.1	-17295.1	4513.8
31.2819	5810.0	5674.4	-17242.4	4508.1
31.3016	5725.0	5668.6	-17321.6	4502.3
31.3214	5739.0	5662.9	-17301.9	4496.5
31.3411	5805.0	5657.1	-17230.1	4490.8
31.3608	5695.0	5651.3	-17334.3	4485.0
31.3805	5822.0	5645.6	-17201.6	4479.3
31.4002	5748.0	5639.8	-17269.8	4473.5
31.4199	5760.0	5743.3	-17361.3	4467.8
31.4396	5816.0	5744.1	-17306.1	4462.0
31.4593	5809.0	5745.4	-17314.4	4456.3
31.4790	5733.0	5747.3	-17392.3	4450.5
31.4987	5792.0	5750.1	-17336.1	4444.8
31.5184	5722.0	5753.7	-17409.7	4439.0
31.5381	5765.0	5758.2	-17371.2	4433.3
31.5578	5925.0	5763.9	-17216.9	4427.5
31.5775	5756.0	5770.8	-17392.8	4421.8
31.5972	5804.0	5779.2	-17353.2	4416.0
31.6169	5852.0	5789.4	-17315.4	4410.3
31.6366	5825.0	5801.5	-17354.5	4404.5
31.6563	5657.0	5815.9	-17536.9	4398.8
31.6761	5905.0	5836.7	-17309.7	4396.5
31.6958	5939.0	5860.6	-17299.6	4394.2
31.7155	5813.0	5888.6	-17453.6	4391.8
31.7352	5913.0	5921.3	-17386.3	4389.5
31.7549	5863.0	5959.8	-17474.8	4387.2
31.7746	5951.0	6005.5	-17432.5	4384.9
31.7943	5824.0	6060.2	-17614.2	4382.6
31.8140	5834.0	6126.3	-17670.3	4380.3
31.8337	5948.0	6206.9	-17636.9	4378.0
31.8534	5921.0	6306.4	-17763.4	4375.7
31.8731	6092.0	6431.0	-17717.0	4373.4
31.8928	6209.0	6589.4	-17758.4	4371.1
31.9125	6517.0	6794.8	-17655.8	4368.8
31.9322	6752.0	7067.9	-17693.9	4366.5
31.9519	7518.0	7448.0	-17308.0	4364.2
31.9716	8380.0	8033.4	-17031.4	4361.9
31.9913	9769.0	9111.3	-16720.3	4359.5
32.0110	12330.0	11444.3	-16492.3	4357.2
32.0307	17628.0	16563.1	-16313.1	4354.9
32.0505	26634.0	26462.6	-17206.6	4352.6
32.0702	40911.0	41602.6	-18069.6	4350.3
32.0899	58125.0	58427.7	-17680.7	4348.0
32.1096	69512.0	67408.3	-15274.3	4345.7
32.1293	62418.0	60513.1	-15473.1	4343.4
32.1490	43360.0	44105.6	-18123.6	4341.1
32.1687	26430.0	28356.8	-19304.8	4338.8
32.1884	16603.0	17686.3	-18461.3	4336.5
32.2081	11631.0	11968.2	-17715.2	4334.2
32.2278	9157.0	9327.9	-17548.9	4331.9
32.2475	7797.0	8121.1	-17702.1	4329.5
32.2672	6991.0	7482.8	-17869.8	4327.2
32.2869	6789.0	7075.9	-17664.9	4324.9
32.3066	6568.0	6785.3	-17595.3	4322.6
32.3263	6338.0	6566.6	-17606.6	4320.3
32.3460	6118.0	6397.4	-17657.4	4318.0
32.3657	6162.0	6263.8	-17479.8	4315.7
32.3854	6033.0	6156.3	-17501.3	4313.4
32.4052	5884.0	6068.2	-17562.2	4311.1
32.4249	5719.0	5995.6	-17654.6	4308.8
32.4446	5853.0	5934.8	-17459.8	4306.5
32.4643	5822.0	5883.2	-17439.2	4304.2
32.4840	5728.0	5839.1	-17489.1	4301.9
32.5037	5745.0	5801.1	-17434.1	4299.5
32.5234	5778.0	5767.9	-17367.9	4297.2
32.5431	5802.0	5738.8	-17314.8	4294.9
32.5628	5862.0	5713.0	-17229.0	4292.6
32.5825	5811.0	5690.1	-17257.1	4290.3
32.6022	5706.0	5669.6	-17341.6	4288.0
32.6219	5811.0	5651.2	-17218.2	4285.7
32.6416	5553.0	5634.5	-17459.5	4283.4
32.6613	5700.0	5621.9	-17299.9	4283.8
32.6810	5807.0	5610.7	-17181.7	4284.1
32.7007	5804.0	5600.6	-17174.6	4284.5
32.7204	5744.0	5591.5	-17225.5	4284.8
32.7401	5757.0	5661.4	-17282.4	4285.2
32.7599	5824.0	5658.4	-17212.4	4285.5
32.7796	5834.0	5656.5	-17200.5	4285.9
32.7993	5793.0	5655.7	-17240.7	4286.3
32.8190	5772.0	5551.7	-17157.7	4286.6
32.8387	5757.0	5558.5	-17179.5	4287.0
32.8584	5661.0	5566.0	-17283.0	4287.3
32.8781	5759.0	5574.2	-17193.2	4287.7
32.8978	5702.0	5583.2	-17259.2	4288.1
32.9175	5773.0	5593.2	-17198.2	4288.4
32.9372	5776.0	5604.3	-17206.3	4288.8
32.9569	5804.0	5616.8	-17190.8	4289.1
32.9766	5897.0	5630.7	-17111.7	4289.5
32.9963	5857.0	5646.4	-17167.4	4289.8
33.0160	5860.0	5664.3	-17182.3	4290.2
33.0357	5761.0	5684.6	-17301.6	4290.6
33.0554	5740.0	5708.0	-17346.0	4290.9
33.0751	5913.0	5735.0	-17200.0	4291.3
33.0948	5852.0	5766.5	-17292.5	4291.6
33.1146	5868.0	5803.7	-17313.7	4292.0
33.1343	5861.0	5847.6	-17364.6	4292.3
33.1540	5838.0	5900.3	-17440.3	4292.7
33.1737	5978.0	5964.0	-17364.0	4293.1
33.1934	5943.0	6042.4	-17477.4	4293.4
33.2131	6001.0	6140.1	-17517.1	4293.8
33.2328	6248.0	6263.8	-17393.8	4294.1
33.2525	6121.0	6423.9	-17680.9	4294.5
33.2722	6446.0	6636.8	-17568.8	4294.9
33.2919	6768.0	6934.6	-17544.6	4295.2
33.3116	7341.0	7400.1	-17437.1	4295.6
33.3313	8296.0	8271.3	-17353.3	4295.9
33.3510	9889.0	10152.1	-17641.1	4296.3
33.3707	13770.0	14183.1	-17791.1	4296.6
33.3904	20554.0	21682.1	-18506.1	4297.0
33.4101	31874.0	32814.2	-18318.2	4297.4
33.4298	45197.0	44682.1	-16863.1	4297.7
33.4495	51377.0	50278.4	-16279.4	4298.1
33.4693	45235.0	44502.9	-16645.9	4298.4
33.4890	31749.0	32598.5	-18227.5	4298.8
33.5087	21255.0	21516.0	-17639.0	4299.2
33.5284	14789.0	14087.1	-16676.1	4299.5
33.5481	10916.0	10107.5	-16569.5	4299.9
33.5678	8755.0	8254.1	-16877.1	4300.2
33.5875	7603.0	7394.4	-17169.4	4300.6
33.6072	7027.0	6933.9	-17284.9	4300.9
33.6269	6651.0	6638.8	-17365.8	4301.3
33.6466	6293.0	6427.9	-17512.9	4301.7
33.6663	6080.0	6269.2	-17567.2	4302.0
33.6860	5876.0	6146.7	-17648.7	4302.4
33.7057	5944.0	6050.2	-17484.2	4302.7
33.7254	5786.0	5972.8	-17564.8	4303.1
33.7451	5705.0	5910.0	-17583.0	4303.4
33.7648	5659.0	5858.2	-17577.2	4303.8
33.7845	5595.0	5815.2	-17598.2	4304.2
33.8042	5676.0	5779.0	-17481.0	4304.5
33.8239	5622.0	5748.3	-17504.3	4304.9
33.8437	5636.0	5721.9	-17463.9	4305.2
33.8634	5567.0	5699.3	-17510.3	4305.6
33.8831	5630.0	5679.7	-17427.7	4306.0
33.9028	5618.0	5662.6	-17422.6	4306.3
33.9225	5586.0	5647.6	-17439.6	4306.7
33.9422	5641.0	5634.4	-17371.4	4307.0
33.9619	5460.0	5622.7	-17540.7	4307.4
33.9816	5698.0	5612.4	-17292.4	4307.7
34.0013	5514.0	5603.1	-17467.1	4308.1
34.0210	5550.0	5594.8	-17422.8	4308.5
34.0407	5596.0	5587.3	-17369.3	4308.8
34.0604	5619.0	5580.6	-17339.6	4309.2
34.0801	5587.0	5574.5	-17365.5	4309.5
34.0998	5659.0	5569.0	-17288.0	4309.9
34.1195	5531.0	5564.1	-17411.1	4310.2
34.1392	5531.0	5559.5	-17406.5	4310.6
34.1589	5515.0	5555.4	-17418.4	4311.0
34.1786	5427.0	5477.6	-17428.6	4311.3
34.1984	5687.0	5478.0	-17169.0	4311.7
34.2181	5523.0	5478.3	-17333.3	4312.0
34.2378	5506.0	5478.7	-17350.7	4312.4
34.2575	5570.0	5479.1	-17287.1	4312.8
34.2772	5442.0	5479.4	-17415.4	4313.1
34.2969	5462.0	5479.8	-17395.8	4313.5
34.3166	5411.0	5480.1	-17447.1	4313.8
34.3363	5496.0	5480.5	-17362.5	4314.2
34.3560	5480.0	5480.9	-17378.9	4314.5
34.3757	5599.0	5481.2	-17260.2	4314.9
34.3954	5412.0	5481.6	-17447.6	4315.3
34.4151	5462.0	5481.9	-17397.9	4315.6
34.4348	5405.0	5482.3	-17455.3	4316.0
34.4545	5503.0	5482.6	-17357.6	4316.3
34.4742	5587.0	5483.0	-17274.0	4316.7
34.4939	5566.0	5483.4	-17295.4	4317.1
34.5136	5514.0	5483.7	-17347.7	4317.4
34.5333	5531.0	5484.1	-17331.1	4317.8
34.5531	5651.0	5484.4	-17211.4	4318.1
34.5728	5551.0	5484.8	-17311.8	4318.5
34.5925	5594.0	5485.2	-17269.2	4318.8
34.6122	5436.0	5485.5	-17427.5	4319.2
34.6319	5509.0	5485.9	-17354.9	4319.6
34.6516	5490.0	5486.2	-17374.2	4319.9
34.6713	5571.0	5486.6	-17293.6	4320.3
34.6910	5484.0	5486.9	-17380.9	4320.6
34.7107	5504.0	5487.3	-17361.3	4321.0
34.7304	5440.0	5487.7	-17425.7	4321.3
34.7501	5573.0	5488.0	-17293.0	4321.7
34.7698	5569.0	5488.4	-17297.4	4322.1
34.7895	5443.0	5488.7	-17423.7	4322.4
34.8092	5572.0	5489.1	-17295.1	4322.8
34.8289	5434.0	5489.4	-17433.4	4323.1
34.8486	5530.0	5489.8	-17337.8	4323.5
34.8683	5472.0	5490.2	-17396.2	4323.9
34.8880	5358.0	5490.5	-17510.5	4324.2
34.9078	5567.0	5489.5	-17300.5	4323.1
34.9275	5536.0	5488.4	-17330.4	4322.1
34.9472	5445.0	5487.3	-17420.3	4321.0
34.9669	5585.0	5486.3	-17279.3	4320.0
34.9866	5489.0	5485.2	-17374.2	4318.9
35.0063	5482.0	5484.1	-17380.1	4317.8
35.0260	5490.0	5483.1	-17371.1	4316.8
35.0457	5510.0	5482.0	-17350.0	4315.7
35.0654	5423.0	5480.9	-17435.9	4314.6
35.0851	5468.0	5479.9	-17389.9	4313.6
35.1048	5471.0	5478.8	-17385.8	4312.5
35.1245	5530.0	5477.7	-17325.7	4311.4
35.1442	5383.0	5476.7	-17471.7	4310.4
35.1639	5497.0	5475.6	-17356.6	4309.3
35.1836	5546.0	5474.6	-17306.6	4308.2
35.2033	5564.0	5473.5	-17287.5	4307.2
35.2230	5458.0	5472.4	-17392.4	4306.1
35.2427	5381.0	5471.4	-17468.4	4305.1
35.2625	5371.0	5470.3	-17477.3	4304.0
35.2822	5437.0	5469.2	-17410.2	4302.9
35.3019	5551.0	5468.2	-17295.2	4301.9
35.3216	5424.0	5467.1	-17421.1	4300.8
35.3413	5381.0	5466.0	-17463.0	4299.7
35.3610	5537.0	5465.0	-17306.0	4298.7
35.3807	5500.0	5463.9	-17341.9	4297.6
35.4004	5463.0	5462.8	-17377.8	4296.5
35.4201	5579.0	5461.8	-17260.8	4295.5
35.4398	5323.0	5460.7	-17515.7	4294.4
35.4595	5349.0	5459.6	-17488.6	4293.3
35.4792	5408.0	5458.6	-17428.6	4292.3
35.4989	5473.0	5457.5	-17362.5	4291.2
35.5186	5397.0	5456.5	-17437.5	4290.1
35.5383	5426.0	5455.4	-17407.4	4289.1
35.5580	5425.0	5454.3	-17407.3	4288.0
35.5777	5515.0	5453.3	-17316.3	4287.0
35.5974	5441.0	5452.2	-17389.2	4285.9
35.6172	5587.0	5451.1	-17242.1	4284.8
35.6369	5479.0	5450.1	-17349.1	4283.8
35.6566	5511.0	5449.0	-17316.0	4282.7
35.6763	5464.0	5447.9	-17361.9	4281.6
35.6960	5487.0	5446.9	-17337.9	4280.6
35.7157	5412.0	5445.8	-17411.8	4279.5
35.7354	5417.0	5444.7	-17405.7	4278.4
35.7551	5480.0	5443.7	-17341.7	4277.4
35.7748	5365.0	5442.6	-17455.6	4276.3
35.7945	5488.0	5441.5	-17331.5	4275.2
35.8142	5289.0	5440.5	-17529.5	4274.2
35.8339	5500.0	5441.1	-17319.1	4272.9
35.8536	5448.0	5439.9	-17369.9	4271.6
35.8733	5455.0	5438.8	-17361.8	4270.3
35.8930	5461.0	5437.6	-17354.6	4269.0
35.9127	5415.0	5436.4	-17399.4	4267.7
35.9324	5430.0	5435.3	-17383.3	4266.4
35.9521	5500.0	5434.2	-17312.2	4265.1
35.9718	5341.0	5433.1	-17470.1	4263.8
35.9916	5383.0	5432.0	-17427.0	4262.5
36.0113	5469.0	5430.9	-17339.9	4261.3
36.0310	5542.0	5429.9	-17265.9	4260.0
36.0507	5376.0	5428.9	-17430.9	4258.7
36.0704	5432.0	5427.9	-17373.9	4257.4
36.0901	5358.0	5427.0	-17447.0	4256.1
36.1098	5391.0	5426.1	-17413.1	4254.8
36.1295	5430.0	5425.2	-17373.2	4253.5
36.1492	5339.0	5424.5	-17463.5	4252.2
36.1689	5414.0	5423.8	-17387.8	4250.9
36.1886	5395.0	5423.2	-17406.2	4249.6
36.2083	5339.0	5422.7	-17461.7	4248.3
36.2280	5474.0	5422.4	-17326.4	4247.0
36.2477	5396.0	5422.2	-17404.2	4245.8
36.2674	5387.0	5422.3	-17413.3	4244.5
36.2871	5420.0	5422.7	-17380.7	4243.2
36.3068	5440.0	5423.4	-17361.4	4241.9
36.3265	5459.0	5424.7	-17343.7	4240.6
36.3463	5439.0	5426.6	-17365.6	4239.3
36.3660	5391.0	5429.5	-17416.5	4238.0
36.3857	5528.0	5433.8	-17283.8	4236.7
36.4054	5486.0	5440.5	-17332.5	4235.4
36.4251	5525.0	5451.9	-17304.9	4234.1
36.4448	5471.0	5474.7	-17381.7	4232.8
36.4645	5544.0	5524.2	-17358.2	4231.5
36.4842	5629.0	5627.1	-17376.1	4230.2
36.5039	5745.0	5810.1	-17443.1	4229.0
36.5236	6214.0	6070.4	-17234.4	4227.7
36.5433	6502.0	6335.7	-17211.7	4226.4
36.5630	6661.0	6446.2	-17163.2	4225.1
36.5827	6406.0	6302.7	-17274.7	4223.8
36.6024	6079.0	6027.9	-17326.9	4222.5
36.6221	5804.0	5773.0	-17347.0	4221.2
36.6418	5600.0	5598.9	-17376.9	4219.9
36.6615	5526.0	5502.2	-17354.2	4218.6
36.6812	5452.0	5454.9	-17380.9	4217.3
36.7010	5361.0	5431.6	-17448.6	4216.0
36.7207	5487.0	5418.5	-17309.5	4214.7
36.7404	5370.0	5409.7	-17417.7	4213.4
36.7601	5329.0	5403.0	-17452.0	4212.2
36.7798	5355.0	5397.7	-17420.7	4210.9
36.7995	5386.0	5393.3	-17385.3	4209.6
36.8192	5474.0	5389.5	-17293.5	4208.3
36.8389	5405.0	5386.2	-17359.2	4207.0
36.8586	5424.0	5383.3	-17337.3	4205.7
36.8783	5295.0	5380.7	-17463.7	4204.4
36.8980	5407.0	5378.3	-17349.3	4203.1
36.9177	5350.0	5376.1	-17404.1	4201.8
36.9374	5408.0	5374.0	-17344.0	4200.5
36.9571	5437.0	5372.0	-17313.0	4199.2
36.9768	5441.0	5370.1	-17307.1	4197.9
36.9965	5288.0	5368.3	-17458.3	4196.7
37.0162	5352.0	5366.6	-17392.6	4195.4
37.0359	5267.0	5364.9	-17475.9	4194.1
37.0557	5364.0	5363.2	-17377.2	4192.8
37.0754	5411.0	5361.6	-17328.6	4191.5
37.0951	5430.0	5360.1	-17308.1	4190.2
37.1148	5234.0	5358.5	-17502.5	4188.9
37.1345	5368.0	5357.0	-17367.0	4187.6
37.1542	5437.0	5355.5	-17296.5	4186.3
37.1739	5325.0	5354.1	-17407.1	4185.0
37.1936	5257.0	5352.6	-17473.6	4183.7
37.2133	5318.0	5351.2	-17411.2	4182.4
37.2330	5359.0	5349.7	-17368.7	4181.2
37.2527	5312.0	5348.3	-17414.3	4179.9
37.2724	5374.0	5346.9	-17350.9	4178.6
37.2921	5274.0	5345.5	-17449.5	4177.3
37.3118	5339.0	5342.3	-17381.3	4176.0
37.3315	5313.0	5341.0	-17406.0	4174.7
37.3512	5336.0	5339.7	-17381.7	4173.4
37.3709	5383.0	5338.4	-17333.4	4172.1
37.3906	5202.0	5337.1	-17513.1	4170.8
37.4104	5417.0	5335.8	-17296.8	4169.5
37.4301	5326.0	5334.5	-17386.5	4168.2
37.4498	5282.0	5333.2	-17429.2	4166.9
37.4695	5351.0	5332.0	-17359.0	4165.6
37.4892	5235.0	5330.7	-17473.7	4164.4
37.5089	5292.0	5329.4	-17415.4	4163.1
37.5286	5350.0	5328.1	-17356.1	4161.8
37.5483	5205.0	5326.8	-17499.8	4160.5
37.5680	5349.0	5325.5	-17354.5	4159.2
37.5877	5374.0	5324.2	-17328.2	4157.9
37.6074	5250.0	5322.9	-17450.9	4156.6
37.6271	5295.0	5321.6	-17404.6	4155.3
37.6468	5356.0	5320.3	-17342.3	4154.0
37.6665	5347.0	5319.0	-17350.0	4152.7
37.6862	5358.0	5317.7	-17337.7	4151.4
37.7059	5252.0	5316.5	-17442.5	4150.1
37.7256	5365.0	5315.2	-17328.2	4148.9
37.7453	5355.0	5313.9	-17336.9	4147.6
37.7650	5252.0	5312.6	-17438.6	4146.3
37.7848	5253.0	5311.3	-17436.3	4145.0
37.8045	5177.0	5310.0	-17511.0	4143.7
37.8242	5320.0	5308.7	-17366.7	4142.4
37.8439	5317.0	5307.4	-17368.4	4141.1
37.8636	5342.0	5306.1	-17342.1	4139.8
37.8833	5201.0	5304.8	-17481.8	4138.5
37.9030	5285.0	5303.5	-17396.5	4137.2
37.9227	5289.0	5302.2	-17391.2	4135.9
37.9424	5371.0	5300.9	-17307.9	4134.6
37.9621	5367.0	5299.7	-17310.7	4133.3
37.9818	5395.0	5298.4	-17281.4	4132.1
38.0015	5242.0	5297.1	-17433.1	4130.8
38.0212	5264.0	5295.8	-17409.8	4129.5
38.0409	5401.0	5294.5	-17271.5	4128.2
38.0606	5134.0	5293.2	-17537.2	4126.9
38.0803	5299.0	5292.9	-17371.9	4126.6
38.1000	5249.0	5292.6	-17421.6	4126.3
38.1197	5355.0	5292.3	-17315.3	4126.0
38.1395	5248.0	5292.0	-17422.0	4125.7
38.1592	5368.0	5291.7	-17301.7	4125.4
38.1789	5225.0	5291.4	-17444.4	4125.1
38.1986	5357.0	5291.1	-17312.1	4124.8
38.2183	5286.0	5290.8	-17382.8	4124.5
38.2380	5208.0	5290.5	-17460.5	4124.2
38.2577	5294.0	5290.2	-17374.2	4123.9
38.2774	5343.0	5289.9	-17324.9	4123.6
38.2971	5435.0	5289.6	-17232.6	4123.3
38.3168	5330.0	5289.3	-17337.3	4123.0
38.3365	5189.0	5289.0	-17478.0	4122.7
38.3562	5206.0	5288.7	-17460.7	4122.4
38.3759	5352.0	5288.4	-17314.4	4122.1
38.3956	5388.0	5288.1	-17278.1	4121.8
38.4153	5338.0	5287.8	-17327.8	4121.5
38.4350	5326.0	5287.5	-17339.5	4121.2
38.4547	5358.0	5287.2	-17307.2	4120.9
38.4744	5388.0	5286.9	-17276.9	4120.6
38.4942	5427.0	5286.6	-17237.6	4120.3
38.5139	5189.0	5286.3	-17475.3	4120.0
38.5336	5302.0	5286.0	-17362.0	4119.7
38.5533	5376.0	5285.7	-17287.7	4119.4
38.5730	5135.0	5285.4	-17528.4	4119.1
38.5927	5392.0	5285.1	-17271.1	4118.8
38.6124	5210.0	5284.8	-17452.8	4118.5
38.6321	5263.0	5284.5	-17399.5	4118.2
38.6518	5328.0	5284.2	-17334.2	4117.9
38.6715	5231.0	5283.9	-17430.9	4117.6
38.6912	5331.0	5283.6	-17330.6	4117.3
38.7109	5328.0	5283.3	-17333.3	4117.0
38.7306	5196.0	5283.0	-17465.0	4116.7
38.7503	5337.0	5282.7	-17323.7	4116.4
38.7700	5311.0	5282.4	-17349.4	4116.1
38.7897	5197.0	5282.1	-17463.1	4115.8
38.8094	5432.0	5281.8	-17227.8	4115.5
38.8291	5410.0	5281.5	-17249.5	4115.2
38.8489	5365.0	5281.2	-17294.2	4114.9
38.8686	5206.0	5280.9	-17452.9	4114.6
38.8883	5242.0	5280.6	-17416.6	4114.3
38.9080	5161.0	5280.3	-17497.3	4114.0
38.9277	5211.0	5280.0	-17447.0	4113.7
38.9474	5238.0	5279.7	-17419.7	4113.4
38.9671	5373.0	5279.4	-17284.4	4113.1
38.9868	5198.0	5279.1	-17459.1	4112.8
39.0065	5388.0	5278.8	-17268.8	4112.5
39.0262	5285.0	5278.5	-17371.5	4112.2
39.0459	5275.0	5278.2	-17381.2	4111.9
39.0656	5211.0	5277.9	-17444.9	4111.6
39.0853	5136.0	5277.6	-17519.6	4111.3
39.1050	5252.0	5277.3	-17403.3	4111.0
39.1247	5262.0	5277.0	-17393.0	4110.7
39.1444	5302.0	5276.7	-17352.7	4110.4
39.1641	5388.0	5276.4	-17266.4	4110.1
39.1838	5261.0	5276.1	-17393.1	4109.8
39.2036	5371.0	5275.8	-17282.8	4109.5
39.2233	5288.0	5275.5	-17365.5	4109.2
39.2430	5193.0	5275.2	-17460.2	4108.9
39.2627	5090.0	5274.9	-17562.9	4108.6
39.2824	5272.0	5274.7	-17380.7	4108.4
39.3021	5360.0	5274.5	-17292.5	4108.2
39.3218	5221.0	5274.3	-17431.3	4108.0
39.3415	5241.0	5274.1	-17411.1	4107.8
39.3612	5281.0	5273.9	-17370.9	4107.6
39.3809	5201.0	5273.7	-17450.7	4107.4
39.4006	5281.0	5273.5	-17370.5	4107.2
39.4203	5255.0	5273.3	-17396.3	4107.0
39.4400	5166.0	5273.1	-17485.1	4106.8
39.4597	5328.0	5272.9	-17322.9	4106.6
39.4794	5224.0	5272.7	-17426.7	4106.3
39.4991	5358.0	5272.5	-17292.5	4106.1
39.5188	5120.0	5272.3	-17530.3	4105.9
39.5385	5276.0	5272.0	-17374.0	4105.7
39.5583	5316.0	5271.8	-17333.8	4105.5
39.5780	5240.0	5271.6	-17409.6	4105.3
39.5977	5183.0	5271.4	-17466.4	4105.1
39.6174	5255.0	5271.2	-17394.2	4104.9
39.6371	5258.0	5271.0	-17391.0	4104.7
39.6568	5255.0	5270.8	-17393.8	4104.5
39.6765	5168.0	5270.6	-17480.6	4104.3
39.6962	5360.0	5270.4	-17288.4	4104.1
39.7159	5201.0	5270.2	-17447.2	4103.9
39.7356	5264.0	5270.0	-17384.0	4103.7
39.7553	5261.0	5269.8	-17386.8	4103.5
39.7750	5288.0	5269.6	-17359.6	4103.3
39.7947	5321.0	5269.4	-17326.4	4103.1
39.8144	5286.0	5269.2	-17361.2	4102.9
39.8341	5286.0	5269.0	-17361.0	4102.7
39.8538	5216.0	5268.8	-17430.8	4102.5
39.8735	5268.0	5268.6	-17378.6	4102.3
39.8932	5208.0	5268.4	-17438.4	4102.1
39.9129	5314.0	5268.2	-17332.2	4101.9
39.9327	5267.0	5268.0	-17379.0	4101.7
39.9524	5449.0	5267.8	-17196.8	4101.5
39.9721	5200.0	5267.6	-17445.6	4101.3
39.9918	5375.0	5267.4	-17270.4	4101.1
40.0115	5224.0	5267.2	-17421.2	4100.9
40.0312	5210.0	5267.0	-17435.0	4100.7
40.0509	5240.0	5266.8	-17404.8	4100.5
40.0706	5403.0	5266.6	-17241.6	4100.3
40.0903	5293.0	5266.4	-17351.4	4100.1
40.1100	5278.0	5266.2	-17366.2	4099.9
40.1297	5205.0	5266.0	-17439.0	4099.7
40.1494	5212.0	5265.8	-17431.8	4099.5
40.1691	5258.0	5265.6	-17385.6	4099.3
40.1888	5207.0	5265.4	-17436.4	4099.1
40.2085	5327.0	5265.2	-17316.2	4098.9
40.2282	5304.0	5265.0	-17339.0	4098.7
40.2479	5194.0	5264.8	-17448.8	4098.5
40.2676	5235.0	5264.6	-17407.6	4098.2
40.2874	5305.0	5264.4	-17337.4	4098.0
40.3071	5362.0	5264.2	-17280.2	4097.8
40.3268	5243.0	5263.9	-17398.9	4097.6
40.3465	5338.0	5263.7	-17303.7	4097.4
40.3662	5328.0	5263.5	-17313.5	4097.2
40.3859	5390.0	5263.3	-17251.3	4097.0
40.4056	5309.0	5263.1	-17332.1	4096.8
40.4253	5343.0	5262.9	-17297.9	4096.6
40.4450	5500.0	5262.7	-17140.7	4096.4
40.4647	5417.0	5262.5	-17223.5	4096.2
40.4844	5389.0	5262.3	-17251.3	4096.0
40.5041	5431.0	5262.1	-17209.1	4095.8
40.5238	5267.0	5261.9	-17372.9	4095.6
40.5435	5337.0	5261.7	-17302.7	4095.4
40.5632	5236.0	5261.5	-17403.5	4095.2
40.5829	5311.0	5261.3	-17328.3	4095.0
40.6026	5362.0	5261.1	-17277.1	4094.8
40.6223	5249.0	5260.9	-17389.9	4094.6
40.6421	5272.0	5260.7	-17366.7	4094.4
40.6618	5179.0	5260.5	-17459.5	4094.2
40.6815	5341.0	5260.3	-17297.3	4094.0
40.7012	5268.0	5260.1	-17370.1	4093.8
40.7209	5188.0	5259.9	-17449.9	4093.6
40.7406	5239.0	5259.7	-17398.7	4093.4
40.7603	5246.0	5259.5	-17391.5	4093.2
40.7800	5234.0	5259.3	-17403.3	4093.0
40.7997	5251.0	5259.1	-17386.1	4092.8
40.8194	5297.0	5258.9	-17339.9	4092.6
40.8391	5231.0	5258.7	-17405.7	4092.4
40.8588	5177.0	5258.5	-17459.5	4092.2
40.8785	5194.0	5258.3	-17442.3	4092.0
40.8982	5281.0	5258.1	-17355.1	4091.8
40.9179	5319.0	5257.9	-17316.9	4091.6
40.9376	5261.0	5257.7	-17374.7	4091.4
40.9573	5298.0	5257.5	-17337.5	4091.2
40.9770	5263.0	5257.3	-17372.3	4091.0
40.9968	5193.0	5257.1	-17442.1	4090.8
41.0165	5286.0	5256.9	-17348.9	4090.6
41.0362	5102.0	5256.7	-17532.7	4090.3
41.0559	5262.0	5255.9	-17371.9	4089.6
41.0756	5314.0	5255.2	-17319.2	4088.9
41.0953	5227.0	5254.5	-17405.5	4088.1
41.1150	5317.0	5253.7	-17314.7	4087.4
41.1347	5118.0	5253.0	-17513.0	4086.7
41.1544	5279.0	5252.3	-17351.3	4085.9
41.1741	5274.0	5251.5	-17355.5	4085.2
41.1938	5234.0	5250.8	-17394.8	4084.5
41.2135	5224.0	5250.1	-17404.1	4083.7
41.2332	5298.0	5249.3	-17329.3	4083.0
41.2529	5184.0	5248.6	-17442.6	4082.3
41.2726	5152.0	5247.8	-17473.8	4081.5
41.2923	5233.0	5247.1	-17392.1	4080.8
41.3120	5249.0	5246.4	-17375.4	4080.1
41.3317	5118.0	5245.6	-17505.6	4079.3
41.3515	5160.0	5244.9	-17462.9	4078.6
41.3712	5188.0	5244.2	-17434.2	4077.9
41.3909	5210.0	5243.4	-17411.4	4077.1
41.4106	5302.0	5242.7	-17318.7	4076.4
41.4303	5150.0	5242.0	-17470.0	4075.7
41.4500	5211.0	5241.2	-17408.2	4074.9
41.4697	5312.0	5240.5	-17306.5	4074.2
41.4894	5168.0	5239.8	-17449.8	4073.5
41.5091	5237.0	5239.0	-17380.0	4072.7
41.5288	5096.0	5238.3	-17520.3	4072.0
41.5485	5091.0	5237.6	-17524.6	4071.3
41.5682	5186.0	5236.8	-17428.8	4070.5
41.5879	5266.0	5236.1	-17348.1	4069.8
41.6076	5307.0	5235.4	-17306.4	4069.1
41.6273	5253.0	5234.6	-17359.6	4068.3
41.6470	5228.0	5233.9	-17383.9	4067.6
41.6667	5173.0	5233.2	-17438.2	4066.9
41.6864	5202.0	5232.4	-17408.4	4066.1
41.7061	5300.0	5231.7	-17309.7	4065.4
41.7259	5233.0	5231.0	-17376.0	4064.6
41.7456	5304.0	5230.2	-17304.2	4063.9
41.7653	5147.0	5229.5	-17460.5	4063.2
41.7850	5316.0	5228.8	-17290.8	4062.4
41.8047	5136.0	5228.0	-17470.0	4061.7
41.8244	5175.0	5227.3	-17430.3	4061.0
41.8441	5082.0	5226.6	-17522.6	4060.2
41.8638	5256.0	5225.8	-17347.8	4059.5
41.8835	5237.0	5225.1	-17366.1	4058.8
41.9032	5199.0	5224.3	-17403.3	4058.0
41.9229	5281.0	5223.6	-17320.6	4057.3
41.9426	5350.0	5222.9	-17250.9	4056.6
41.9623	5138.0	5222.1	-17462.1	4055.8
41.9820	5252.0	5221.4	-17347.4	4055.1
42.0017	5292.0	5220.7	-17306.7	4054.4
42.0214	5221.0	5219.9	-17376.9	4053.6
42.0411	5268.0	5219.2	-17329.2	4052.9
42.0608	5338.0	5218.5	-17258.5	4052.2
42.0806	5255.0	5217.7	-17340.7	4051.4
42.1003	5264.0	5217.0	-17331.0	4050.7
42.1200	5231.0	5216.3	-17363.3	4050.0
42.1397	5158.0	5215.5	-17435.5	4049.2
42.1594	5121.0	5214.8	-17471.8	4048.5
42.1791	5261.0	5214.1	-17331.1	4047.8
42.1988	5219.0	5213.3	-17372.3	4047.0
42.2185	5234.0	5212.6	-17356.6	4046.3
42.2382	5199.0	5211.9	-17390.9	4045.6
42.2579	5198.0	5211.1	-17391.1	4044.8
42.2776	5212.0	5210.4	-17376.4	4044.1
42.2973	5256.0	5209.7	-17331.7	4043.4
42.3170	5187.0	5208.9	-17399.9	4042.6
42.3367	5083.0	5208.2	-17503.2	4041.9
42.3564	5300.0	5207.5	-17285.5	4041.2
42.3761	5269.0	5206.7	-17315.7	4040.4
42.3958	5220.0	5206.0	-17364.0	4039.7
42.4155	5235.0	5205.3	-17348.3	4038.9
42.4353	5288.0	5204.5	-17294.5	4038.2
42.4550	5300.0	5203.8	-17281.8	4037.5
42.4747	5285.0	5203.1	-17296.1	4036.7
42.4944	5117.0	5202.3	-17463.3	4036.0
42.5141	5077.0	5201.6	-17502.6	4035.3
42.5338	5225.0	5200.8	-17353.8	4034.5
42.5535	5130.0	5200.1	-17448.1	4033.8
42.5732	5157.0	5199.4	-17420.4	4033.1
42.5929	5208.0	5198.6	-17368.6	4032.3
42.6126	5218.0	5197.9	-17357.9	4031.6
42.6323	5069.0	5197.2	-17506.2	4030.9
42.6520	5270.0	5198.3	-17306.3	4031.9
42.6717	5274.0	5199.3	-17303.3	4033.0
42.6914	5194.0	5200.4	-17384.4	4034.1
42.7111	5195.0	5201.5	-17384.5	4035.2
42.7308	5299.0	5202.6	-17281.6	4036.2
42.7505	5207.0	5203.6	-17374.6	4037.3
42.7702	5166.0	5204.7	-17416.7	4038.4
42.7900	5133.0	5205.8	-17450.8	4039.5
42.8097	5226.0	5206.9	-17358.9	4040.6
42.8294	5195.0	5207.9	-17390.9	4041.6
42.8491	5291.0	5209.0	-17296.0	4042.7
42.8688	5154.0	5210.1	-17434.1	4043.8
42.8885	5250.0	5211.2	-17339.2	4044.9
42.9082	5260.0	5212.2	-17330.2	4045.9
42.9279	5147.0	5213.3	-17444.3	4047.0
42.9476	5160.0	5214.4	-17432.4	4048.1
42.9673	5191.0	5234.4	-17421.4	4049.2
42.9870	5300.0	5236.5	-17314.5	4050.2
43.0067	5283.0	5238.6	-17333.6	4051.3
43.0264	5347.0	5240.9	-17271.9	4052.4
43.0461	5221.0	5243.2	-17400.2	4053.5
43.0658	5223.0	5245.6	-17400.6	4054.5
43.0855	5192.0	5248.2	-17434.2	4055.6
43.1052	5183.0	5250.9	-17445.9	4056.7
43.1249	5169.0	5253.8	-17462.8	4057.8
43.1447	5117.0	5256.8	-17517.8	4058.8
43.1644	5302.0	5258.4	-17334.4	4058.3
43.1841	5145.0	5260.3	-17493.3	4057.8
43.2038	5302.0	5275.8	-17351.8	4057.2
43.2235	5299.0	5278.9	-17357.9	4056.7
43.2432	5185.0	5282.4	-17475.4	4056.2
43.2629	5170.0	5286.4	-17494.4	4055.6
43.2826	5261.0	5290.9	-17407.9	4055.1
43.3023	5250.0	5296.1	-17424.1	4054.6
43.3220	5274.0	5301.9	-17405.9	4054.1
43.3417	5225.0	5308.7	-17461.7	4053.5
43.3614	5375.0	5316.6	-17319.6	4053.0
43.3811	5403.0	5325.7	-17300.7	4052.5
43.4008	5210.0	5336.3	-17504.3	4051.9
43.4205	5270.0	5348.9	-17456.9	4051.4
43.4402	5356.0	5363.8	-17385.8	4050.9
43.4599	5283.0	5381.7	-17476.7	4050.3
43.4796	5209.0	5403.4	-17572.4	4049.8
43.4994	5307.0	5430.2	-17501.2	4049.3
43.5191	5412.0	5463.4	-17429.4	4048.7
43.5388	5438.0	5505.6	-17445.6	4048.2
43.5585	5618.0	5560.4	-17320.4	4047.7
43.5782	5685.0	5635.3	-17328.3	4047.1
43.5979	5783.0	5747.3	-17342.3	4046.6
43.6176	6145.0	5939.1	-17172.1	4046.1
43.6373	6668.0	6305.6	-17015.6	4045.5
43.6570	7458.0	7014.4	-16934.4	4045.0
43.6767	8550.0	8268.0	-17096.0	4044.5
43.6964	10155.0	10162.3	-17385.3	4044.0
43.7161	12113.0	12456.9	-17721.9	4043.4
43.7358	13780.0	14316.8	-17914.8	4042.9
43.7555	14418.0	14501.7	-17461.7	4042.4
43.7752	13139.0	12872.5	-17111.5	4041.8
43.7949	11371.0	10619.7	-16626.7	4041.3
43.8146	9276.0	8689.3	-16791.2	4040.8
43.8343	7949.0	7410.2	-16839.2	4040.2
43.8540	7337.0	6746.4	-16787.4	4039.7
43.8738	7080.0	6554.2	-16852.2	4039.2
43.8935	7419.0	6760.9	-16719.9	4038.6
43.9132	7936.0	7401.1	-16843.1	4038.1
43.9329	8609.0	8530.1	-17299.1	4037.6
43.9526	9451.0	10047.2	-17974.2	4037.0
43.9723	10635.0	11495.5	-18238.5	4036.5
43.9920	10790.0	12043.7	-18631.7	4036.0
44.0117	10642.0	11169.5	-17905.5	4035.4
44.0314	9834.0	9574.5	-17118.5	4034.9
44.0511	8477.0	8050.6	-16951.6	4034.4
44.0708	7499.0	6942.6	-16821.6	4033.8
44.0905	6559.0	6270.6	-17089.6	4033.3
44.1102	6149.0	5910.3	-17139.3	4032.8
44.1299	5583.0	5724.4	-17519.4	4032.3
44.1496	5535.0	5622.0	-17465.0	4031.7
44.1693	5377.0	5557.9	-17558.9	4031.2
44.1890	5325.0	5513.2	-17566.2	4030.7
44.2087	5383.0	5480.3	-17475.3	4030.1
44.2285	5458.0	5455.5	-17375.5	4029.6
44.2482	5330.0	5437.0	-17485.0	4029.1
44.2679	5295.0	5423.3	-17506.3	4028.5
44.2876	5242.0	5413.5	-17549.5	4028.0
44.3073	5337.0	5407.1	-17448.1	4027.5
44.3270	5147.0	5403.7	-17634.7	4026.9
44.3467	5244.0	5403.0	-17537.0	4026.4
44.3664	5268.0	5405.0	-17515.0	4025.9
44.3861	5278.0	5409.7	-17509.7	4025.3
44.4058	5456.0	5417.2	-17339.2	4024.8
44.4255	5311.0	5427.8	-17494.8	4024.3
44.4452	5261.0	5442.0	-17559.0	4023.7
44.4649	5336.0	5460.3	-17502.3	4023.2
44.4846	5472.0	5483.7	-17389.7	4022.7
44.5043	5324.0	5513.2	-17567.2	4022.2
44.5240	5361.0	5550.6	-17567.6	4021.6
44.5437	5291.0	5580.0	-17667.0	4021.1
44.5634	5523.0	5641.9	-17496.9	4020.6
44.5832	5692.0	5722.9	-17408.9	4020.0
44.6029	5707.0	5830.9	-17501.9	4019.5
44.6226	5982.0	5985.1	-17381.1	4019.0
44.6423	6402.0	6230.7	-17206.7	4018.4
44.6620	6987.0	6676.4	-17067.4	4017.9
44.6817	7861.0	7543.7	-17060.7	4017.4
44.7014	9395.0	9173.4	-17156.4	4016.8
44.7211	11902.0	11896.1	-17372.1	4016.3
44.7408	15791.0	15714.9	-17301.9	4015.8
44.7605	20377.0	19867.9	-16868.9	4015.2
44.7802	23399.0	22428.7	-16407.7	4014.7
44.7999	23098.0	21488.1	-15768.1	4014.2
44.8196	19085.0	17815.5	-16108.5	4013.6
44.8393	14037.0	13666.4	-17007.4	4013.1
44.8590	10471.0	10359.4	-17266.4	4012.6
44.8787	8357.0	8213.9	-17234.9	4012.1
44.8984	7205.0	7012.5	-17185.5	4011.5
44.9181	6403.0	6391.0	-17366.0	4011.0
44.9379	6116.0	6061.7	-17323.7	4010.5
44.9576	5851.0	5868.7	-17395.7	4009.9
44.9773	5652.0	5738.9	-17464.9	4009.4
44.9970	5544.0	5643.6	-17477.6	4008.9
45.0167	5488.0	5570.5	-17460.5	4008.3
45.0364	5363.0	5512.9	-17527.9	4007.8
45.0561	5331.0	5466.7	-17513.7	4007.3
45.0758	5390.0	5429.0	-17417.0	4006.7
45.0955	5273.0	5397.9	-17502.9	4006.2
45.1152	5242.0	5371.9	-17507.9	4005.7
45.1349	5345.0	5350.0	-17383.0	4005.1
45.1546	5289.0	5331.3	-17420.3	4004.6
45.1743	5383.0	5315.2	-17310.2	4004.1
45.1940	5273.0	5301.3	-17406.3	4003.5
45.2137	5328.0	5289.2	-17339.2	4003.0
45.2334	5271.0	5278.5	-17385.5	4002.5
45.2531	5187.0	5269.0	-17460.0	4002.0
45.2728	5146.0	5260.6	-17492.6	4001.4
45.2926	5229.0	5253.0	-17402.0	4000.9
45.3123	5274.0	5246.3	-17350.3	4000.4
45.3320	5176.0	5240.2	-17442.2	3999.8
45.3517	5287.0	5234.6	-17325.6	3999.3
45.3714	5156.0	5229.6	-17451.6	3998.8
45.3911	5160.0	5224.9	-17442.9	3998.2
45.4108	5209.0	5220.7	-17389.7	3997.7
45.4305	5264.0	5216.8	-17330.8	3997.2
45.4502	5213.0	5213.2	-17378.2	3996.6
45.4699	5194.0	5209.8	-17393.8	3996.1
45.4896	5185.0	5206.7	-17399.7	3995.6
45.5093	5179.0	5203.7	-17402.7	3995.0
45.5290	5209.0	5201.0	-17370.0	3994.5
45.5487	5222.0	5198.4	-17354.4	3994.0
45.5684	5218.0	5196.0	-17356.0	3993.4
45.5881	5152.0	5159.2	-17385.2	3992.9
45.6078	5091.0	5158.7	-17445.7	3992.4
45.6275	5068.0	5158.2	-17468.2	3991.9
45.6472	5265.0	5158.1	-17271.1	3991.8
45.6670	5128.0	5158.1	-17408.1	3991.8
45.6867	5054.0	5158.1	-17482.1	3991.8
45.7064	5214.0	5158.1	-17322.1	3991.8
45.7261	5060.0	5158.1	-17476.1	3991.8
45.7458	5188.0	5158.1	-17348.1	3991.8
45.7655	5262.0	5158.0	-17274.0	3991.7
45.7852	5058.0	5158.0	-17478.0	3991.7
45.8049	5121.0	5158.0	-17415.0	3991.7
45.8246	5224.0	5158.0	-17312.0	3991.7
45.8443	5245.0	5158.0	-17291.0	3991.7
45.8640	5090.0	5158.0	-17446.0	3991.7
45.8837	5201.0	5157.9	-17334.9	3991.6
45.9034	5323.0	5157.9	-17212.9	3991.6
45.9231	5073.0	5157.9	-17462.9	3991.6
45.9428	5076.0	5157.9	-17459.9	3991.6
45.9625	5260.0	5157.9	-17275.9	3991.6
45.9822	5251.0	5157.9	-17284.9	3991.6
46.0019	5111.0	5157.9	-17424.8	3991.5
46.0217	5235.0	5157.8	-17300.8	3991.5
46.0414	5185.0	5157.8	-17350.8	3991.5
46.0611	5205.0	5157.8	-17330.8	3991.5
46.0808	5061.0	5157.8	-17474.8	3991.5
46.1005	5223.0	5157.8	-17312.8	3991.5
46.1202	5179.0	5157.8	-17356.8	3991.4
46.1399	5164.0	5157.7	-17371.7	3991.4
46.1596	5158.0	5157.7	-17377.7	3991.4
46.1793	5120.0	5157.7	-17415.7	3991.4
46.1990	5149.0	5157.7	-17386.7	3991.4
46.2187	5267.0	5157.7	-17268.7	3991.4
46.2384	5224.0	5157.7	-17311.7	3991.3
46.2581	5264.0	5157.6	-17271.6	3991.3
46.2778	5069.0	5157.6	-17466.6	3991.3
46.2975	5068.0	5157.6	-17467.6	3991.3
46.3172	5212.0	5157.6	-17323.6	3991.3
46.3369	5113.0	5157.6	-17422.6	3991.3
46.3566	5160.0	5157.6	-17375.6	3991.2
46.3764	5266.0	5157.5	-17269.5	3991.2
46.3961	5242.0	5157.5	-17293.5	3991.2
46.4158	5153.0	5157.5	-17382.5	3991.2
46.4355	5197.0	5157.5	-17338.5	3991.2
46.4552	5110.0	5157.5	-17425.5	3991.2
46.4749	5102.0	5157.5	-17433.5	3991.2
46.4946	5130.0	5157.4	-17405.4	3991.1
46.5143	5188.0	5157.4	-17347.4	3991.1
46.5340	5180.0	5157.4	-17355.4	3991.1
46.5537	5203.0	5157.4	-17332.4	3991.1
46.5734	5214.0	5157.4	-17321.4	3991.1
46.5931	5186.0	5157.4	-17349.4	3991.1
46.6128	5198.0	5157.3	-17337.3	3991.0
46.6325	5212.0	5157.3	-17323.3	3991.0
46.6522	5086.0	5157.3	-17449.3	3991.0
46.6719	5255.0	5157.3	-17280.3	3991.0
46.6916	5232.0	5157.3	-17303.3	3991.0
46.7113	5172.0	5157.3	-17363.3	3991.0
46.7311	5072.0	5157.2	-17463.2	3990.9
46.7508	5169.0	5157.2	-17366.2	3990.9
46.7705	5144.0	5157.2	-17391.2	3990.9
46.7902	5155.0	5157.2	-17380.2	3990.9
46.8099	5241.0	5157.2	-17294.2	3990.9
46.8296	5088.0	5157.2	-17447.2	3990.9
46.8493	5099.0	5157.1	-17436.2	3990.8
46.8690	5301.0	5157.1	-17234.1	3990.8
46.8887	5127.0	5157.1	-17408.1	3990.8
46.9084	5264.0	5157.1	-17271.1	3990.8
46.9281	5005.0	5157.1	-17530.1	3990.8
46.9478	5267.0	5156.4	-17267.4	3990.1
46.9675	5161.0	5155.7	-17372.7	3989.4
46.9872	5267.0	5155.1	-17266.1	3988.8
47.0069	5114.0	5154.4	-17418.4	3988.1
47.0266	5118.0	5153.7	-17413.7	3987.4
47.0463	5111.0	5153.1	-17420.1	3986.8
47.0660	5134.0	5152.4	-17396.4	3986.1
47.0858	5146.0	5151.7	-17383.7	3985.4
47.1055	5158.0	5151.1	-17371.1	3984.7
47.1252	5232.0	5150.4	-17296.4	3984.1
47.1449	5107.0	5149.7	-17420.7	3983.4
47.1646	5215.0	5149.0	-17312.0	3982.7
47.1843	5102.0	5148.4	-17424.4	3982.1
47.2040	5145.0	5190.7	-17423.7	3981.4
47.2237	5226.0	5192.2	-17344.2	3980.7
47.2434	5186.0	5193.9	-17385.9	3980.1
47.2631	5185.0	5195.7	-17388.7	3979.4
47.2828	5178.0	5197.7	-17397.7	3978.7
47.3025	5178.0	5200.0	-17400.0	3978.0
47.3222	5243.0	5202.5	-17337.5	3977.4
47.3419	5238.0	5205.3	-17345.3	3976.7
47.3616	5101.0	5208.4	-17485.4	3976.0
47.3813	5290.0	5211.8	-17299.8	3975.4
47.4010	5203.0	5215.6	-17390.6	3974.7
47.4207	5153.0	5219.9	-17444.9	3974.0
47.4404	5375.0	5224.7	-17227.7	3973.4
47.4602	5251.0	5230.1	-17357.1	3972.7
47.4799	5303.0	5236.2	-17311.2	3972.0
47.4996	5316.0	5243.0	-17305.0	3971.3
47.5193	5262.0	5250.7	-17366.7	3970.7
47.5390	5183.0	5259.5	-17454.5	3970.0
47.5587	5255.0	5269.4	-17392.4	3969.3
47.5784	5199.0	5280.8	-17459.8	3968.7
47.5981	5134.0	5293.9	-17537.9	3968.0
47.6178	5280.0	5309.0	-17407.0	3967.3
47.6375	5214.0	5326.5	-17490.5	3966.7
47.6572	5268.0	5347.1	-17457.1	3966.0
47.6769	5254.0	5371.2	-17495.2	3965.3
47.6966	5274.0	5399.9	-17503.9	3964.7
47.7163	5318.0	5434.3	-17494.3	3964.0
47.7360	5322.0	5475.9	-17531.9	3963.3
47.7557	5462.0	5526.8	-17442.8	3962.6
47.7754	5437.0	5590.0	-17531.0	3962.0
47.7951	5419.0	5669.6	-17628.6	3961.3
47.8149	5616.0	5772.6	-17534.6	3960.6
47.8346	5837.0	5909.5	-17450.5	3960.0
47.8543	5769.0	6105.1	-17714.1	3959.3
47.8740	6268.0	6416.4	-17526.4	3958.6
47.8937	6876.0	6971.8	-17473.8	3958.0
47.9134	7949.0	8015.3	-17444.3	3957.3
47.9331	9718.0	9900.5	-17560.5	3956.6
47.9528	12781.0	12948.0	-17545.0	3955.9
47.9725	16913.0	17142.5	-17607.5	3955.3
47.9922	22186.0	21708.6	-16900.6	3954.6
48.0119	25323.0	24708.4	-16763.4	3953.9
48.0316	24321.0	24029.0	-17086.0	3953.3
48.0513	20353.0	20216.4	-17241.4	3952.6
48.0710	15518.0	15620.2	-17480.2	3951.9
48.0907	11950.0	11773.0	-17201.0	3951.3
48.1104	9673.0	9139.4	-16844.4	3950.6
48.1301	8325.0	7580.1	-16633.1	3949.9
48.1498	7432.0	6735.5	-16681.5	3949.2
48.1696	6680.0	6280.2	-16978.2	3948.6
48.1893	6289.0	6017.2	-17106.2	3947.9
48.2090	6079.0	5844.6	-17143.6	3947.2
48.2287	5682.0	5720.0	-17416.0	3946.6
48.2484	5588.0	5624.9	-17414.9	3945.9
48.2681	5581.0	5550.1	-17347.1	3945.2
48.2878	5429.0	5490.1	-17439.1	3944.6
48.3075	5445.0	5441.3	-17374.3	3943.9
48.3272	5258.0	5401.0	-17521.0	3943.2
48.3469	5249.0	5367.3	-17496.3	3942.5
48.3666	5384.0	5338.9	-17332.9	3941.9
48.3863	5314.0	5314.7	-17378.7	3941.2
48.4060	5224.0	5294.0	-17448.0	3940.5
48.4257	5359.0	5275.9	-17294.9	3939.9
48.4454	5264.0	5260.2	-17374.2	3939.2
48.4651	5222.0	5246.4	-17402.4	3938.5
48.4848	5208.0	5234.2	-17404.2	3937.9
48.5045	5121.0	5223.3	-17480.3	3937.2
48.5243	5138.0	5213.6	-17453.6	3936.5
48.5440	5171.0	5204.8	-17411.8	3935.8
48.5637	5219.0	5197.0	-17356.0	3935.2
48.5834	5072.0	5189.8	-17495.8	3934.5
48.6031	5275.0	5188.1	-17291.1	3938.6
48.6228	5183.0	5186.9	-17381.9	3942.7
48.6425	5276.0	5186.2	-17288.2	3946.9
48.6622	5097.0	5186.0	-17467.0	3951.0
48.6819	5143.0	5186.1	-17421.1	3955.1
48.7016	5171.0	5186.6	-17393.6	3959.2
48.7213	4928.0	5187.3	-17637.3	3963.3
48.7410	5016.0	5184.0	-17546.0	3963.1
48.7607	5106.0	5181.0	-17453.0	3962.9
48.7804	5085.0	5178.1	-17471.1	3962.7
48.8001	5132.0	5175.4	-17421.4	3962.4
48.8198	5149.0	5173.0	-17402.0	3962.2
48.8395	5097.0	5170.6	-17451.6	3962.0
48.8592	5198.0	5128.1	-17308.1	3961.7
48.8790	5050.0	5127.8	-17455.8	3961.5
48.8987	5052.0	5127.6	-17453.6	3961.3
48.9184	5158.0	5127.4	-17347.4	3961.1
48.9381	5082.0	5127.1	-17423.1	3960.8
48.9578	5097.0	5126.9	-17407.9	3960.6
48.9775	5147.0	5126.7	-17357.7	3960.4
48.9972	5088.0	5126.4	-17416.4	3960.1
49.0169	5074.0	5126.2	-17430.2	3959.9
49.0366	5212.0	5126.0	-17292.0	3959.7
49.0563	5192.0	5125.8	-17311.8	3959.5
49.0760	5158.0	5125.5	-17345.5	3959.2
49.0957	5101.0	5125.3	-17402.3	3959.0
49.1154	5218.0	5125.1	-17285.1	3958.8
49.1351	5068.0	5124.8	-17434.8	3958.5
49.1548	5060.0	5124.6	-17442.6	3958.3
49.1745	5180.0	5124.4	-17322.4	3958.1
49.1942	5193.0	5124.2	-17309.2	3957.9
49.2139	5203.0	5123.9	-17298.9	3957.6
49.2337	5099.0	5123.7	-17402.7	3957.4
49.2534	5126.0	5123.5	-17375.5	3957.2
49.2731	5196.0	5123.2	-17305.2	3956.9
49.2928	5054.0	5123.0	-17447.0	3956.7
49.3125	5207.0	5122.8	-17293.8	3956.5
49.3322	5185.0	5122.6	-17315.6	3956.2
49.3519	5132.0	5122.3	-17368.3	3956.0
49.3716	5045.0	5122.1	-17455.1	3955.8
[truncated: 3,584 more rows]
