# Supplementary material for: Structural and microstructural characterization and properties of new phases in the Nd–Sr–Co–(Fe/Mn)–O system as air-electrodes in SOFCs
Source: Royal Society of Chemistry journal article supplement (doi:10.1039/c6dt03970g), 2016-12-17
Supplement: c6dt03970g4.dat [file c6dt03970g4.dat]

2Theta	Yobs	Ycal	Yobs-Ycal	Backg	Bragg	Posr	(hkl)	K
10.0000	3195.0	3082.3	-4676.8	2856.0	14.3627	0	( 0 0 2)	0 1
10.0197	3217.0	3082.3	-4542.1	2856.0	24.5694	0	( 1 0 1)	0 1
10.0394	3155.0	3082.3	-4604.1	2856.0	28.9402	0	( 0 0 4)	0 1
10.0591	3086.0	3082.3	-4673.1	2856.0	32.1070	0	( 1 0 3)	0 1
10.0788	3056.0	3082.3	-4703.1	2856.0	33.4269	0	( 1 1 0)	0 1
10.0985	3168.0	3082.3	-4591.1	2856.0	36.5447	0	( 1 1 2)	0 1
10.1182	3068.0	3082.3	-4691.1	2856.0	43.7573	0	( 1 0 5)	0 1
10.1379	3136.0	3082.3	-4623.1	2856.0	44.0160	0	( 0 0 6)	0 1
10.1576	3182.0	3082.3	-4577.1	2856.0	44.7806	0	( 1 1 4)	0 1
10.1773	3136.0	3082.3	-4623.1	2856.0	47.9884	0	( 2 0 0)	0 1
10.1971	3055.0	3082.3	-4704.1	2856.0	50.3505	0	( 2 0 2)	0 1
10.2168	3112.0	3082.3	-4647.1	2856.0	54.6311	0	( 2 1 1)	0 1
10.2365	3154.0	3082.3	-4605.1	2856.0	56.3682	0	( 1 1 6)	0 1
10.2562	3045.0	3082.3	-4714.1	2856.0	57.0082	0	( 2 0 4)	0 1
10.2759	3068.0	3082.3	-4691.1	2856.0	57.6474	0	( 1 0 7)	0 1
10.2956	3152.0	3082.3	-4607.1	2856.0	58.9050	0	( 2 1 3)	0 1
10.3153	3164.0	3082.3	-4595.1	2856.0	59.9464	0	( 0 0 8)	0 1
10.3350	3085.0	3082.3	-4674.1	2856.0	66.9394	0	( 2 1 5)	0 1
10.3547	3132.0	3082.3	-4627.1	2856.0	67.1341	0	( 2 0 6)	0 1
10.3744	3105.0	3082.3	-4654.1	2856.0	70.2011	0	( 2 2 0)	0 1
10.3941	3063.0	3082.3	-4696.1	2856.0	70.3949	0	( 1 1 8)	0 1
10.4138	3150.0	3082.3	-4609.1	2856.0	72.0894	0	( 2 2 2)	0 1
10.4335	3147.0	3082.3	-4612.1	2856.0	73.4037	0	( 1 0 9)	0 1
10.4532	3100.0	3082.3	-4659.1	2856.0	75.6237	0	( 3 0 1)	0 1
10.4729	3096.0	3082.3	-4663.1	2856.0	77.2837	0	( 0 0 10)	0 1
10.4926	3035.0	3082.3	-4724.1	2856.0	77.6447	0	( 2 2 4)	0 1
10.5123	3125.0	3082.3	-4634.1	2856.0	78.1948	0	( 2 1 7)	0 1
10.5320	3117.0	3082.3	-4642.1	2856.0	79.2854	0	( 3 0 3)	0 1
10.5518	3134.0	3082.3	-4625.1	2856.0	80.0113	0	( 3 1 0)	0 1
10.5715	3173.0	3082.3	-4586.1	2856.0	80.1964	0	( 2 0 8)	0 1
10.5912	3096.0	3082.3	-4663.1	2856.0	81.8208	0	( 3 1 2)	0 1
10.6109	2999.0	3082.3	-4760.1	2856.0	86.4926	0	( 3 0 5)	0 1
10.6306	3141.0	3082.3	-4618.1	2856.0	86.6722	0	( 2 2 6)	0 1
10.6503	3093.0	3082.3	-4666.1	2856.0	86.8549	0	( 1 1 10)	0 1
10.6700	3068.0	3082.3	-4691.1	2856.0	87.2077	0	( 3 1 4)	0 1
10.6897	3111.0	3082.3	-4648.1	2856.0	91.5027	0	( 1 0 11)	0 1
10.7094	3195.0	3082.3	-4564.1	2856.0	92.5729	0	( 2 1 9)	0 1
10.7291	3111.0	3082.3	-4648.1	2856.0	94.7164	0	( 3 2 1)	0 1
10.7488	3102.0	3082.3	-4657.1	2856.0	96.1541	0	( 3 1 6)	0 1
10.7685	3041.0	3082.3	-4718.1	2856.0	96.3376	0	( 2 0 10)	0 1
10.7882	3201.0	3082.3	-4558.1	2856.0	97.0597	0	( 0 0 12)	0 1
10.8079	3028.0	3082.3	-4731.1	2856.0	97.2341	0	( 3 0 7)	0 1
10.8276	3123.0	3082.3	-4636.1	2856.0	98.3135	0	( 3 2 3)	0 1
10.8473	3127.0	3082.3	-4632.1	2856.0	99.2205	0	( 2 2 8)	0 1
10.8670	3156.0	3082.3	-4603.1	2856.0	105.6236	0	( 3 2 5)	0 1
10.8867	3186.0	3082.3	-4573.1	2856.0	106.7469	0	( 1 1 12)	0 1
10.9065	3023.0	3082.3	-4736.1	2856.0	108.8016	0	( 4 0 0)	0 1
10.9262	3109.0	3082.3	-4650.1	2856.0	108.9944	0	( 3 1 8)	0 1
10.9459	3072.0	3082.3	-4687.1	2856.0	110.6999	0	( 4 0 2)	0 1
10.9656	3099.0	3082.3	-4660.1	2856.0	110.8983	0	( 2 1 11)	0 1
10.9853	3029.0	3082.3	-4730.1	2856.0	112.0475	0	( 3 0 9)	0 1
11.0050	3147.0	3082.3	-4612.1	2856.0	113.6035	0	( 1 0 13)	0 1
11.0247	3138.0	3082.3	-4621.1	2856.0	114.3748	0	( 4 1 1)	0 1
11.0444	2987.0	3082.3	-4772.1	2856.0	116.1590	0	( 2 2 10)	0 1
11.0641	3027.0	3082.3	-4732.1	2856.0	116.5521	0	( 4 0 4)	0 1
11.0838	3000.0	3082.3	-4759.1	2856.0	116.9606	0	( 2 0 12)	0 1
11.1035	3065.0	3082.3	-4694.1	2856.0	117.1550	0	( 3 2 7)	0 1
11.1232	3010.0	3082.3	-4749.1	2856.0	118.3634	0	( 4 1 3)	0 1
11.1429	3030.0	3082.3	-4729.1	2856.0	119.1779	0	( 3 3 0)	0 1
11.1626	2988.0	3082.3	-4771.1	2856.0	121.2452	0	( 3 3 2)	0 1
11.1823	3041.0	3082.3	-4718.1	2856.0
11.2020	3000.0	3082.3	-4759.1	2856.0
11.2217	3047.0	3082.3	-4712.1	2856.0
11.2414	3072.0	3082.3	-4687.1	2856.0
11.2612	3037.0	3082.3	-4722.1	2856.0
11.2809	2965.0	3082.3	-4794.1	2856.0
11.3006	3021.0	3082.3	-4738.1	2856.0
11.3203	3092.0	3082.3	-4667.1	2856.0
11.3400	3021.0	3082.3	-4738.1	2856.0
11.3597	3030.0	3082.3	-4729.1	2856.0
11.3794	3044.0	3082.3	-4715.1	2856.0
11.3991	3042.0	3082.3	-4717.1	2856.0
11.4188	3096.0	3082.3	-4663.1	2856.0
11.4385	3072.0	3086.4	-4691.1	2860.1
11.4582	2943.0	3082.3	-4816.1	2856.0
11.4779	3004.0	3078.3	-4751.0	2852.0
11.4976	2966.0	3074.3	-4785.0	2847.9
11.5173	2931.0	3070.2	-4816.0	2843.9
11.5370	2942.0	3066.2	-4800.9	2839.9
11.5567	3014.0	3062.1	-4724.9	2835.8
11.5764	2992.0	3058.1	-4742.8	2831.8
11.5961	2958.0	3054.0	-4772.8	2827.7
11.6159	3007.0	3050.0	-4719.7	2823.7
11.6356	2981.0	3045.9	-4741.7	2819.6
11.6553	3013.0	3041.9	-4705.6	2815.6
11.6750	2924.0	3037.8	-4790.6	2811.5
11.6947	2987.0	3033.8	-4723.6	2807.5
11.7144	2929.0	3029.8	-4777.5	2803.5
11.7341	3071.0	3025.7	-4631.5	2799.4
11.7538	3097.0	3021.7	-4601.4	2795.4
11.7735	2941.0	3017.6	-4753.4	2791.3
11.7932	2792.0	3013.6	-4898.3	2787.3
11.8129	2865.0	3009.5	-4821.3	2783.2
11.8326	2920.0	3005.5	-4762.3	2779.2
11.8523	2949.0	3001.5	-4729.2	2775.2
11.8720	2977.0	2997.4	-4697.2	2771.1
11.8917	3034.0	2993.4	-4636.1	2767.1
11.9114	2900.0	2989.3	-4766.1	2763.0
11.9311	3043.0	2985.3	-4619.0	2759.0
11.9508	3013.0	2981.2	-4645.0	2754.9
11.9705	2875.0	2977.2	-4779.0	2750.9
11.9903	2981.0	2973.1	-4668.9	2746.8
12.0100	2899.0	2969.1	-4746.8	2742.8
12.0297	2895.0	2965.1	-4746.8	2738.8
12.0494	3053.0	2961.0	-4584.8	2734.7
12.0691	2910.0	2957.0	-4723.7	2730.7
12.0888	2997.0	2952.9	-4632.7	2726.6
12.1085	3027.0	2948.9	-4598.6	2722.6
12.1282	2856.0	2944.8	-4765.6	2718.5
12.1479	2990.0	2940.8	-4627.5	2714.5
12.1676	2870.0	2936.8	-4743.5	2710.5
12.1873	2796.0	2932.7	-4813.5	2706.4
12.2070	2905.0	2928.7	-4700.4	2702.4
12.2267	2833.0	2924.6	-4768.4	2698.3
12.2464	3018.0	2920.6	-4579.3	2694.3
12.2661	2955.0	2916.5	-4638.3	2690.2
12.2858	2919.0	2912.5	-4670.2	2686.2
12.3055	2901.0	2908.5	-4684.2	2682.2
12.3252	2915.0	2904.4	-4666.2	2678.1
12.3450	2973.0	2900.3	-4604.1	2674.0
12.3647	2893.0	2896.3	-4680.1	2670.0
12.3844	3036.0	2892.3	-4533.0	2666.0
12.4041	2870.0	2888.2	-4695.0	2661.9
12.4238	2921.0	2884.2	-4639.9	2657.9
12.4435	3003.0	2880.1	-4553.9	2653.8
12.4632	2802.0	2876.1	-4750.8	2649.8
12.4829	2881.0	2872.0	-4667.8	2645.7
12.5026	2898.0	2868.0	-4646.8	2641.7
12.5223	2919.0	2864.0	-4621.7	2637.7
12.5420	2863.0	2859.9	-4673.7	2633.6
12.5617	2895.0	2855.9	-4637.6	2629.6
12.5814	2822.0	2851.8	-4706.6	2625.5
12.6011	2894.0	2847.8	-4630.5	2621.5
12.6208	2860.0	2843.7	-4660.5	2617.4
12.6405	2830.0	2839.7	-4686.5	2613.4
12.6602	2863.0	2835.7	-4649.4	2609.4
12.6799	2800.0	2831.6	-4708.4	2605.3
12.6997	2934.0	2827.6	-4570.3	2601.3
12.7194	2874.0	2823.5	-4626.3	2597.2
12.7391	2826.0	2819.5	-4670.2	2593.2
12.7588	2885.0	2815.4	-4607.2	2589.1
12.7785	2786.0	2811.4	-4702.1	2585.1
12.7982	2990.0	2810.3	-4497.1	2584.0
12.8179	2838.0	2809.3	-4648.0	2583.0
12.8376	2887.0	2808.2	-4597.9	2581.9
12.8573	2849.0	2807.1	-4634.9	2580.8
12.8770	2918.0	2806.1	-4564.8	2579.8
12.8967	2841.0	2805.0	-4640.7	2578.7
12.9164	2844.0	2803.9	-4636.7	2577.6
12.9361	2889.0	2802.9	-4590.6	2576.6
12.9558	2871.0	2801.8	-4607.5	2575.5
12.9755	2733.0	2800.7	-4744.5	2574.4
12.9952	2878.0	2799.7	-4598.4	2573.4
13.0149	2813.0	2798.6	-4662.4	2572.3
13.0346	2812.0	2797.5	-4662.3	2571.2
13.0544	2833.0	2796.5	-4640.2	2570.2
13.0741	2768.0	2795.4	-4704.1	2569.1
13.0938	2700.0	2794.3	-4771.1	2568.0
13.1135	2837.0	2793.3	-4633.0	2567.0
13.1332	2809.0	2792.2	-4660.0	2565.9
13.1529	2915.0	2791.1	-4552.9	2564.8
13.1726	2822.0	2790.1	-4644.8	2563.8
13.1923	2832.0	2789.0	-4633.8	2562.7
13.2120	2872.0	2787.9	-4592.7	2561.6
13.2317	2692.0	2786.9	-4771.6	2560.6
13.2514	2842.0	2785.8	-4620.6	2559.5
13.2711	2831.0	2784.7	-4630.5	2558.4
13.2908	2764.0	2783.7	-4696.4	2557.4
13.3105	2835.0	2782.6	-4624.4	2556.3
13.3302	2769.0	2781.6	-4689.3	2555.3
13.3499	2845.0	2780.5	-4612.2	2554.2
13.3696	2793.0	2779.4	-4663.2	2553.1
13.3893	2919.0	2778.4	-4536.1	2552.1
13.4091	2764.0	2777.3	-4690.0	2551.0
13.4288	2710.0	2776.2	-4743.0	2549.9
13.4485	2864.0	2775.2	-4587.9	2548.9
13.4682	2704.0	2774.1	-4746.8	2547.8
13.4879	2763.0	2773.0	-4686.8	2546.7
13.5076	2810.0	2772.0	-4638.7	2545.7
13.5273	2741.0	2770.9	-4706.6	2544.6
13.5470	2746.0	2769.8	-4700.6	2543.5
13.5667	2722.0	2768.8	-4723.5	2542.5
13.5864	2808.0	2767.7	-4636.4	2541.4
13.6061	2794.0	2766.6	-4649.4	2540.3
13.6258	2642.0	2765.6	-4800.3	2539.3
13.6455	2811.0	2764.5	-4630.3	2538.2
13.6652	2753.0	2763.4	-4687.2	2537.1
13.6849	2779.0	2762.4	-4660.1	2536.1
13.7046	2663.0	2761.3	-4775.1	2535.0
13.7243	2705.0	2760.2	-4732.0	2533.9
13.7440	2766.0	2759.2	-4669.9	2532.9
13.7638	2787.0	2758.1	-4647.9	2531.8
13.7835	2757.0	2757.0	-4676.8	2530.7
13.8032	2750.0	2756.0	-4682.7	2529.7
13.8229	2666.0	2754.9	-4765.7	2528.6
13.8426	2674.0	2753.8	-4756.6	2527.5
13.8623	2806.0	2753.6	-4624.4	2526.5
13.8820	2828.0	2752.6	-4601.4	2525.4
13.9017	2674.0	2751.7	-4754.4	2524.3
13.9214	2751.0	2750.7	-4676.4	2523.3
13.9411	2780.0	2749.7	-4646.5	2522.2
13.9608	2789.0	2748.8	-4636.5	2521.2
13.9805	2637.0	2747.9	-4787.6	2520.1
14.0002	2621.0	2747.0	-4802.7	2519.0
14.0199	2744.0	2744.4	-4677.1	2516.2
14.0396	2686.0	2741.8	-4732.5	2513.4
14.0593	2751.0	2739.3	-4665.0	2510.6
14.0790	2667.0	2736.8	-4746.6	2507.9
14.0987	2723.0	2734.4	-4688.2	2505.1
14.1184	2685.0	2732.1	-4723.9	2502.3
14.1382	2779.0	2730.0	-4627.7	2499.5
14.1579	2751.0	2728.0	-4653.7	2496.7
14.1776	2799.0	2726.3	-4604.0	2493.9
14.1973	2710.0	2725.0	-4691.7	2491.1
14.2170	2779.0	2724.3	-4622.0	2488.3
14.2367	2762.0	2724.6	-4639.3	2485.5
14.2564	2869.0	2727.3	-4535.1	2482.7
14.2761	2874.0	2740.3	-4543.1	2479.9
14.2958	2860.0	2799.0	-4615.7	2477.1
14.3155	3170.0	2988.2	-4494.9	2474.3
14.3352	3493.0	3357.9	-4541.7	2471.5
14.3549	3650.0	3708.5	-4735.2	2468.7
14.3746	3600.0	3654.9	-4731.7	2466.0
14.3943	3165.0	3262.7	-4774.5	2463.2
14.4140	2925.0	2919.3	-4671.0	2460.4
14.4337	2711.0	2759.5	-4725.2	2457.6
14.4534	2659.0	2710.1	-4727.8	2454.8
14.4731	2640.0	2695.1	-4731.8	2452.0
14.4929	2638.0	2687.5	-4726.2	2449.2
14.5126	2688.0	2681.9	-4670.6	2446.4
14.5323	2641.0	2677.1	-4712.9	2443.6
14.5520	2670.0	2673.0	-4679.7	2440.8
14.5717	2681.0	2669.2	-4664.9	2438.0
14.5914	2683.0	2665.6	-4659.3	2435.2
14.6111	2573.0	2662.2	-4765.9	2432.4
14.6308	2622.0	2658.9	-4713.7	2429.6
14.6505	2698.0	2655.7	-4634.5	2426.9
14.6702	2709.0	2652.6	-4620.4	2424.1
14.6899	2690.0	2649.6	-4636.3	2421.3
14.7096	2604.0	2646.6	-4719.3	2418.5
14.7293	2581.0	2643.6	-4739.3	2415.7
14.7490	2666.0	2640.6	-4651.4	2412.9
14.7687	2696.0	2637.7	-4618.5	2410.1
14.7884	2636.0	2634.8	-4675.5	2407.3
14.8081	2667.0	2631.9	-4641.7	2404.5
14.8278	2663.0	2629.0	-4642.8	2401.7
14.8476	2645.0	2626.1	-4657.9	2398.9
14.8673	2567.0	2623.3	-4733.0	2396.1
14.8870	2687.0	2619.6	-4609.4	2393.3
14.9067	2615.0	2616.8	-4678.6	2390.5
14.9264	2685.0	2614.0	-4605.8	2387.7
14.9461	2632.0	2611.3	-4656.0	2385.0
14.9658	2558.0	2608.5	-4727.2	2382.2
14.9855	2589.0	2605.7	-4693.4	2379.4
15.0052	2591.0	2602.9	-4688.6	2376.6
15.0249	2652.0	2600.1	-4624.8	2373.8
15.0446	2559.0	2597.3	-4715.0	2371.0
15.0643	2573.0	2594.5	-4698.3	2368.2
15.0840	2584.0	2591.7	-4684.5	2365.4
15.1037	2605.0	2588.9	-4660.7	2362.6
15.1234	2646.0	2586.1	-4616.9	2359.8
15.1431	2725.0	2583.3	-4535.1	2357.0
15.1628	2516.0	2580.5	-4741.3	2354.2
15.1825	2524.0	2577.7	-4730.5	2351.4
15.2023	2534.0	2574.9	-4717.7	2348.6
15.2220	2600.0	2572.1	-4648.9	2345.8
15.2417	2490.0	2569.4	-4756.1	2343.1
15.2614	2473.0	2566.6	-4770.3	2340.3
15.2811	2566.0	2563.8	-4674.5	2337.5
15.3008	2592.0	2561.0	-4645.7	2334.7
15.3205	2580.0	2558.2	-4654.9	2331.9
15.3402	2584.0	2555.4	-4648.1	2329.1
15.3599	2561.0	2552.6	-4668.4	2326.3
15.3796	2558.0	2549.8	-4668.6	2323.5
15.3993	2458.0	2547.0	-4765.8	2320.7
15.4190	2471.0	2544.2	-4750.0	2317.9
15.4387	2510.0	2541.4	-4708.2	2315.1
15.4584	2543.0	2538.6	-4672.4	2312.3
15.4781	2544.0	2535.9	-4668.6	2309.5
15.4978	2609.0	2533.1	-4600.8	2306.8
15.5175	2430.0	2530.3	-4777.0	2304.0
15.5372	2445.0	2527.5	-4759.2	2301.2
15.5570	2466.0	2524.7	-4735.4	2298.4
15.5767	2599.0	2521.9	-4599.6	2295.6
15.5964	2541.0	2519.1	-4654.8	2292.8
15.6161	2492.0	2516.3	-4701.0	2290.0
15.6358	2447.0	2513.5	-4743.2	2287.2
15.6555	2427.0	2510.7	-4760.5	2284.4
15.6752	2484.0	2508.0	-4700.7	2281.7
15.6949	2454.0	2505.3	-4728.0	2279.0
15.7146	2483.0	2502.5	-4696.3	2276.2
15.7343	2569.0	2499.8	-4607.6	2273.5
15.7540	2499.0	2497.1	-4674.8	2270.8
15.7737	2504.0	2494.4	-4667.1	2268.1
15.7934	2468.0	2491.6	-4700.4	2265.3
15.8131	2490.0	2488.9	-4675.7	2262.6
15.8328	2526.0	2486.2	-4636.9	2259.9
15.8525	2524.0	2483.5	-4636.2	2257.2
15.8722	2474.0	2480.7	-4683.5	2254.4
15.8919	2560.0	2478.0	-4594.8	2251.7
15.9117	2507.0	2475.3	-4645.0	2249.0
15.9314	2485.0	2472.5	-4664.3	2246.2
15.9511	2522.0	2469.8	-4624.6	2243.5
15.9708	2471.0	2467.1	-4672.8	2240.8
15.9905	2557.0	2464.4	-4584.1	2238.1
16.0102	2555.0	2461.6	-4583.4	2235.3
16.0299	2454.0	2458.9	-4681.7	2232.6
16.0496	2473.0	2456.2	-4659.9	2229.9
16.0693	2412.0	2453.5	-4718.2	2227.2
16.0890	2512.0	2450.7	-4615.5	2224.4
16.1087	2403.0	2448.0	-4721.8	2221.7
16.1284	2447.0	2445.3	-4675.0	2219.0
16.1481	2445.0	2442.6	-4674.3	2216.3
16.1678	2419.0	2439.8	-4697.6	2213.5
16.1875	2475.0	2437.1	-4638.9	2210.8
16.2072	2424.0	2434.4	-4687.1	2208.1
16.2269	2421.0	2431.7	-4687.4	2205.4
16.2466	2401.0	2428.9	-4704.7	2202.6
16.2663	2403.0	2426.2	-4700.0	2199.9
16.2861	2407.0	2423.5	-4693.2	2197.2
16.3058	2364.0	2420.8	-4733.5	2194.5
16.3255	2427.0	2418.0	-4667.8	2191.7
16.3452	2449.0	2415.3	-4643.1	2189.0
16.3649	2380.0	2412.6	-4709.3	2186.3
16.3846	2359.0	2409.9	-4727.6	2183.6
16.4043	2418.0	2407.1	-4665.9	2180.8
16.4240	2518.0	2404.4	-4563.2	2178.1
16.4437	2441.0	2401.7	-4637.4	2175.4
16.4634	2477.0	2399.0	-4598.7	2172.7
16.4831	2488.0	2396.2	-4585.0	2169.9
16.5028	2418.0	2393.5	-4652.3	2167.2
16.5225	2394.0	2390.8	-4673.5	2164.5
16.5422	2387.0	2388.1	-4677.8	2161.8
16.5619	2369.0	2385.3	-4693.1	2159.0
16.5816	2351.0	2382.6	-4708.4	2156.3
16.6013	2371.0	2379.9	-4685.6	2153.6
16.6210	2329.0	2377.2	-4724.9	2150.9
16.6408	2529.0	2374.4	-4522.2	2148.1
16.6605	2329.0	2371.7	-4719.5	2145.4
16.6802	2392.0	2369.0	-4653.7	2142.7
16.6999	2348.0	2366.3	-4695.0	2140.0
16.7196	2320.0	2363.5	-4720.3	2137.2
16.7393	2311.0	2360.8	-4726.6	2134.5
16.7590	2471.0	2358.1	-4563.8	2131.8
16.7787	2340.0	2355.4	-4692.1	2129.1
16.7984	2326.0	2352.6	-4703.4	2126.3
16.8181	2368.0	2349.9	-4658.7	2123.6
16.8378	2418.0	2347.2	-4605.9	2120.9
16.8575	2431.0	2344.5	-4590.2	2118.2
16.8772	2303.0	2341.7	-4715.5	2115.4
16.8969	2354.0	2339.0	-4661.8	2112.7
16.9166	2263.0	2336.3	-4750.0	2110.0
16.9363	2261.0	2333.6	-4749.3	2107.3
16.9560	2288.0	2330.8	-4719.6	2104.5
16.9757	2258.0	2328.1	-4746.9	2101.8
16.9955	2354.0	2325.4	-4648.1	2099.1
17.0152	2250.0	2322.6	-4749.4	2096.3
17.0349	2341.0	2319.9	-4655.7	2093.6
17.0546	2293.0	2317.2	-4700.9	2090.9
17.0743	2333.0	2314.5	-4658.2	2088.2
17.0940	2296.0	2311.7	-4692.5	2085.4
17.1137	2331.0	2309.0	-4654.8	2082.7
17.1334	2295.0	2306.3	-4688.0	2080.0
17.1531	2358.0	2303.6	-4622.3	2077.3
17.1728	2261.0	2300.8	-4716.6	2074.5
17.1925	2332.0	2298.1	-4642.9	2071.8
17.2122	2340.0	2295.4	-4632.1	2069.1
17.2319	2315.0	2292.7	-4654.4	2066.4
17.2516	2210.0	2289.9	-4756.7	2063.6
17.2713	2205.0	2287.2	-4759.0	2060.9
17.2910	2264.0	2285.0	-4697.7	2058.7
17.3107	2320.0	2282.7	-4639.4	2056.4
17.3304	2287.0	2280.4	-4670.2	2054.1
17.3502	2219.0	2278.2	-4735.9	2051.9
17.3699	2237.0	2275.9	-4715.7	2049.6
17.3896	2309.0	2273.6	-4641.4	2047.3
17.4093	2312.0	2271.4	-4636.1	2045.1
17.4290	2287.0	2269.1	-4658.9	2042.8
17.4487	2289.0	2266.9	-4654.6	2040.6
17.4684	2298.0	2264.6	-4643.3	2038.3
17.4881	2192.0	2262.3	-4747.1	2036.0
17.5078	2257.0	2260.1	-4679.8	2033.8
17.5275	2222.0	2257.8	-4712.6	2031.5
17.5472	2298.0	2255.5	-4634.3	2029.2
17.5669	2206.0	2253.3	-4724.0	2027.0
17.5866	2265.0	2251.0	-4662.8	2024.7
17.6063	2210.0	2248.8	-4715.5	2022.5
17.6260	2303.0	2246.5	-4620.2	2020.2
17.6457	2270.0	2244.2	-4651.0	2017.9
17.6654	2224.0	2242.0	-4694.7	2015.7
17.6851	2224.0	2239.7	-4692.5	2013.4
17.7049	2221.0	2237.4	-4693.2	2011.1
17.7246	2254.0	2235.2	-4657.9	2008.9
17.7443	2192.0	2232.9	-4717.7	2006.6
17.7640	2212.0	2230.7	-4695.4	2004.4
17.7837	2297.0	2228.4	-4608.1	2002.1
17.8034	2247.0	2226.1	-4655.9	1999.8
17.8231	2188.0	2223.9	-4712.6	1997.6
17.8428	2310.0	2221.6	-4588.4	1995.3
17.8625	2259.0	2219.3	-4637.1	1993.0
17.8822	2270.0	2217.1	-4623.8	1990.8
17.9019	2201.0	2214.8	-4690.6	1988.5
17.9216	2243.0	2212.6	-4646.3	1986.3
17.9413	2186.0	2210.3	-4701.1	1984.0
17.9610	2211.0	2208.0	-4673.8	1981.7
17.9807	2218.0	2205.8	-4664.5	1979.5
18.0004	2185.0	2203.5	-4695.3	1977.2
18.0201	2234.0	2201.3	-4644.0	1975.0
18.0398	2167.0	2199.0	-4708.7	1972.7
18.0595	2169.0	2196.7	-4704.5	1970.4
18.0793	2234.0	2194.5	-4637.2	1968.2
18.0990	2248.0	2192.2	-4620.9	1965.9
18.1187	2170.0	2189.9	-4696.7	1963.6
18.1384	2285.0	2187.7	-4579.4	1961.4
18.1581	2220.0	2185.4	-4642.2	1959.1
18.1778	2104.0	2183.1	-4755.9	1956.8
18.1975	2135.0	2180.9	-4722.6	1954.6
18.2172	2155.0	2178.6	-4700.4	1952.3
18.2369	2176.0	2176.4	-4677.1	1950.1
18.2566	2130.0	2174.1	-4720.9	1947.8
18.2763	2167.0	2171.8	-4681.6	1945.5
18.2960	2181.0	2169.6	-4665.3	1943.3
18.3157	2159.0	2167.3	-4685.1	1941.0
18.3354	2127.0	2165.1	-4714.8	1938.8
18.3551	2202.0	2162.8	-4637.5	1936.5
18.3748	2172.0	2160.5	-4665.3	1934.2
18.3945	2193.0	2158.3	-4642.0	1932.0
18.4142	2071.0	2156.0	-4761.8	1929.7
18.4340	2162.0	2153.7	-4668.5	1927.4
18.4537	2133.0	2151.5	-4695.2	1925.2
18.4734	2151.0	2149.2	-4675.0	1922.9
18.4931	2118.0	2146.9	-4705.7	1920.6
18.5128	2066.0	2144.7	-4755.4	1918.4
18.5325	2130.0	2142.4	-4689.2	1916.1
18.5522	2158.0	2140.2	-4658.9	1913.9
18.5719	2140.0	2137.9	-4674.7	1911.6
18.5916	2153.0	2135.6	-4659.4	1909.3
18.6113	2172.0	2133.4	-4638.1	1907.1
18.6310	2147.0	2131.1	-4660.9	1904.8
18.6507	2165.0	2128.9	-4640.6	1902.6
18.6704	2087.0	2126.6	-4716.3	1900.3
18.6901	2063.0	2124.3	-4738.1	1898.0
18.7098	2171.0	2122.6	-4628.3	1896.3
18.7295	2110.0	2120.8	-4687.6	1894.5
18.7492	2162.0	2119.1	-4633.8	1892.8
18.7689	2171.0	2117.3	-4623.1	1891.0
18.7887	2120.0	2115.6	-4672.3	1889.2
18.8084	2128.0	2113.8	-4662.5	1887.5
18.8281	2152.0	2112.0	-4636.8	1885.7
18.8478	2125.0	2110.3	-4662.0	1884.0
18.8675	2143.0	2108.5	-4642.3	1882.2
18.8872	2148.0	2106.8	-4635.5	1880.5
18.9069	2071.0	2105.0	-4710.8	1878.7
18.9266	2099.0	2103.3	-4681.0	1877.0
18.9463	2092.0	2101.5	-4686.3	1875.2
18.9660	2080.0	2099.8	-4696.5	1873.5
18.9857	2107.0	2098.0	-4667.8	1871.7
19.0054	2156.0	2096.3	-4617.0	1869.9
19.0251	2085.0	2094.5	-4686.2	1868.2
19.0448	2096.0	2092.7	-4673.5	1866.4
19.0645	2007.0	2091.0	-4760.7	1864.7
19.0842	2148.0	2089.2	-4618.0	1862.9
19.1039	2127.0	2087.5	-4637.2	1861.2
19.1236	2081.0	2085.7	-4681.5	1859.4
19.1434	2077.0	2084.0	-4683.7	1857.7
19.1631	2155.0	2082.2	-4604.0	1855.9
19.1828	2000.0	2080.5	-4757.2	1854.1
19.2025	2047.0	2078.7	-4708.4	1852.4
19.2222	1981.0	2076.9	-4772.7	1850.6
19.2419	2032.0	2075.2	-4719.9	1848.9
19.2616	2102.0	2073.4	-4648.2	1847.1
19.2813	2093.0	2071.7	-4655.4	1845.4
19.3010	2080.0	2069.9	-4666.7	1843.6
19.3207	2013.0	2068.2	-4731.9	1841.9
19.3404	2079.0	2066.4	-4664.2	1840.1
19.3601	2080.0	2064.7	-4661.4	1838.4
19.3798	2137.0	2062.9	-4602.7	1836.6
19.3995	1959.0	2061.2	-4778.9	1834.8
19.4192	2060.0	2059.4	-4676.1	1833.1
19.4389	2005.0	2057.6	-4729.4	1831.3
19.4586	2078.0	2055.9	-4654.6	1829.6
19.4783	2043.0	2054.1	-4687.9	1827.8
19.4981	2111.0	2052.4	-4618.1	1826.1
19.5178	2037.0	2050.6	-4690.4	1824.3
19.5375	2055.0	2048.9	-4670.6	1822.6
19.5572	2094.0	2047.1	-4629.9	1820.8
19.5769	1984.0	2045.4	-4738.1	1819.0
19.5966	2056.0	2043.6	-4664.3	1817.3
19.6163	1978.0	2041.8	-4740.6	1815.5
19.6360	2041.0	2040.1	-4675.8	1813.8
19.6557	2004.0	2038.3	-4711.1	1812.0
19.6754	2113.0	2036.6	-4600.3	1810.3
19.6951	1994.0	2034.8	-4717.6	1808.5
19.7148	2095.0	2033.1	-4614.8	1806.8
19.7345	2059.0	2031.3	-4649.1	1805.0
19.7542	2008.0	2029.6	-4698.3	1803.3
19.7739	1988.0	2027.8	-4716.6	1801.5
19.7936	2031.0	2026.1	-4671.8	1799.7
19.8133	2032.0	2024.3	-4669.0	1798.0
19.8330	2051.0	2022.5	-4648.3	1796.2
19.8528	2030.0	2020.8	-4667.5	1794.5
19.8725	2040.0	2019.0	-4655.8	1792.7
19.8922	2007.0	2017.3	-4687.0	1791.0
19.9119	1977.0	2015.5	-4715.3	1789.2
19.9316	1954.0	2013.8	-4736.5	1787.5
19.9513	2021.0	2012.0	-4667.8	1785.7
19.9710	1986.0	2010.3	-4701.0	1783.9
19.9907	2041.0	2008.5	-4644.2	1782.2
20.0104	1969.0	2006.7	-4714.5	1780.4
20.0301	1964.0	2005.0	-4717.7	1778.7
20.0498	1993.0	2003.2	-4687.0	1776.9
20.0695	2037.0	2001.5	-4641.2	1775.2
20.0892	2063.0	1999.7	-4613.5	1773.4
20.1089	1981.0	1998.0	-4693.7	1771.7
20.1286	2074.0	1996.2	-4599.0	1769.9
20.1483	2025.0	1994.5	-4646.2	1768.2
20.1680	1985.0	1992.7	-4684.5	1766.4
20.1877	1907.0	1991.0	-4760.7	1764.6
20.2074	2062.0	1989.4	-4604.1	1763.1
20.2272	2082.0	1987.8	-4582.5	1761.5
20.2469	1962.0	1986.2	-4701.0	1759.9
20.2666	2015.0	1984.6	-4646.4	1758.3
20.2863	1981.0	1983.1	-4678.8	1756.8
20.3060	1958.0	1981.5	-4700.2	1755.2
20.3257	2010.0	1979.9	-4646.7	1753.6
20.3454	2058.0	1978.3	-4597.1	1752.0
20.3651	2042.0	1976.8	-4611.5	1750.5
20.3848	2007.0	1975.2	-4644.9	1748.9
20.4045	1921.0	1973.6	-4729.4	1747.3
20.4242	1996.0	1972.0	-4652.8	1745.7
20.4439	1905.0	1970.5	-4742.2	1744.2
20.4636	1895.0	1968.9	-4750.6	1742.6
20.4833	1898.0	1967.3	-4746.1	1741.0
20.5030	1978.0	1965.7	-4664.5	1739.4
20.5227	1995.0	1964.2	-4645.9	1737.9
20.5424	1965.0	1962.6	-4674.3	1736.3
20.5621	1906.0	1961.0	-4731.8	1734.7
20.5819	1949.0	1959.4	-4687.2	1733.1
20.6016	1938.0	1957.9	-4696.6	1731.6
20.6213	1952.0	1956.3	-4681.0	1730.0
20.6410	2000.0	1954.7	-4631.5	1728.4
20.6607	1959.0	1953.1	-4670.9	1726.8
20.6804	1979.0	1951.6	-4649.3	1725.3
20.7001	2032.0	1950.0	-4594.7	1723.7
20.7198	1957.0	1948.4	-4668.2	1722.1
20.7395	1898.0	1946.8	-4725.6	1720.5
20.7592	1931.0	1945.3	-4691.0	1719.0
20.7789	1984.0	1943.7	-4636.4	1717.4
20.7986	1937.0	1942.1	-4681.9	1715.8
20.8183	1947.0	1940.5	-4670.3	1714.2
20.8380	1966.0	1939.0	-4649.7	1712.7
20.8577	1948.0	1937.4	-4666.1	1711.1
20.8774	1897.0	1935.8	-4715.6	1709.5
20.8971	1959.0	1934.2	-4652.0	1707.9
20.9168	1962.0	1932.7	-4647.4	1706.4
20.9366	1951.0	1931.1	-4656.8	1704.8
20.9563	1900.0	1929.5	-4706.3	1703.2
20.9760	1927.0	1927.9	-4677.7	1701.6
20.9957	1887.0	1926.4	-4716.1	1700.1
21.0154	1890.0	1924.8	-4711.5	1698.5
21.0351	1966.0	1923.2	-4634.0	1696.9
21.0548	1829.0	1921.6	-4769.4	1695.3
21.0745	1924.0	1920.1	-4672.8	1693.8
21.0942	1910.0	1918.5	-4685.2	1692.2
21.1139	1963.0	1916.9	-4630.7	1690.6
21.1336	1880.0	1915.3	-4712.1	1689.0
21.1533	1913.0	1913.8	-4677.5	1687.5
21.1730	1913.0	1912.2	-4675.9	1685.9
21.1927	1873.0	1910.6	-4714.4	1684.3
21.2124	1953.0	1909.0	-4632.8	1682.7
21.2321	1897.0	1907.5	-4687.2	1681.2
21.2518	1893.0	1905.9	-4689.6	1679.6
21.2715	1945.0	1904.3	-4636.1	1678.0
21.2913	1823.0	1902.7	-4756.5	1676.4
21.3110	1905.0	1901.2	-4672.9	1674.9
21.3307	1835.0	1899.6	-4741.3	1673.3
21.3504	1888.0	1898.0	-4686.8	1671.7
21.3701	1843.0	1896.4	-4730.2	1670.1
21.3898	1928.0	1894.9	-4643.6	1668.6
21.4095	1790.0	1893.3	-4780.0	1667.0
21.4292	1937.0	1891.7	-4631.5	1665.4
21.4489	1860.0	1890.1	-4706.9	1663.8
21.4686	1967.0	1888.6	-4598.3	1662.3
21.4883	1839.0	1887.0	-4724.7	1660.7
21.5080	1878.0	1885.4	-4684.2	1659.1
21.5277	1868.0	1883.8	-4692.6	1657.5
21.5474	1941.0	1882.3	-4618.0	1656.0
21.5671	1860.0	1880.7	-4697.4	1654.4
21.5868	1934.0	1879.1	-4621.9	1652.8
21.6065	1933.0	1877.5	-4621.3	1651.2
21.6262	1918.0	1876.0	-4634.7	1649.7
21.6460	1842.0	1874.4	-4709.1	1648.1
21.6657	1949.0	1872.8	-4600.6	1646.5
21.6854	1910.0	1871.2	-4638.0	1644.9
21.7051	1902.0	1869.7	-4644.4	1643.4
21.7248	1902.0	1868.1	-4642.8	1641.8
21.7445	1855.0	1866.5	-4688.3	1640.2
21.7642	1778.0	1864.9	-4763.7	1638.6
21.7839	1861.0	1863.9	-4679.6	1637.6
21.8036	1918.0	1862.8	-4621.6	1636.5
21.8233	1873.0	1861.8	-4665.5	1635.5
21.8430	1873.0	1860.7	-4664.5	1634.4
21.8627	1876.0	1859.7	-4660.4	1633.4
21.8824	1874.0	1858.6	-4661.4	1632.3
21.9021	1768.0	1857.6	-4766.4	1631.3
21.9218	1767.0	1856.6	-4766.3	1630.3
21.9415	1922.0	1855.5	-4610.3	1629.2
21.9612	1846.0	1854.5	-4685.2	1628.2
21.9809	1838.0	1853.4	-4692.2	1627.1
22.0006	1887.0	1852.4	-4642.1	1626.1
22.0204	1824.0	1851.3	-4704.1	1625.0
22.0401	1889.0	1850.3	-4638.0	1624.0
22.0598	1860.0	1849.2	-4666.0	1622.9
22.0795	1854.0	1848.2	-4670.9	1621.9
22.0992	1898.0	1847.1	-4625.9	1620.8
22.1189	1848.0	1846.1	-4674.8	1619.8
22.1386	1911.0	1845.0	-4610.8	1618.7
22.1583	1813.0	1844.0	-4707.7	1617.7
22.1780	1841.0	1842.9	-4678.7	1616.6
22.1977	1824.0	1841.9	-4694.6	1615.6
22.2174	1769.0	1840.8	-4748.6	1614.5
22.2371	1831.0	1839.8	-4685.5	1613.5
22.2568	1831.0	1838.7	-4684.5	1612.4
22.2765	1849.0	1837.7	-4665.4	1611.4
22.2962	1884.0	1836.6	-4629.4	1610.3
22.3159	1816.0	1835.6	-4696.3	1609.3
22.3356	1904.0	1834.6	-4607.3	1608.3
22.3553	1803.0	1833.5	-4707.3	1607.2
22.3751	1828.0	1832.5	-4681.2	1606.2
22.3948	1782.0	1831.4	-4726.2	1605.1
22.4145	1739.0	1830.4	-4768.1	1604.1
22.4342	1825.0	1829.3	-4681.1	1603.0
22.4539	1804.0	1828.3	-4701.0	1602.0
22.4736	1860.0	1827.2	-4644.0	1600.9
22.4933	1784.0	1826.2	-4718.9	1599.9
22.5130	1837.0	1825.1	-4664.9	1598.8
22.5327	1740.0	1824.1	-4760.8	1597.8
22.5524	1872.0	1823.0	-4627.8	1596.7
22.5721	1860.0	1822.0	-4638.7	1595.7
22.5918	1816.0	1820.9	-4681.7	1594.6
22.6115	1817.0	1819.9	-4679.6	1593.6
22.6312	1855.0	1818.8	-4640.6	1592.5
22.6509	1838.0	1817.8	-4656.5	1591.5
22.6706	1823.0	1816.7	-4670.5	1590.4
22.6903	1816.0	1815.7	-4676.4	1589.4
22.7100	1899.0	1814.6	-4592.4	1588.3
22.7298	1770.0	1813.6	-4720.3	1587.3
22.7495	1757.0	1812.5	-4732.3	1586.2
22.7692	1821.0	1811.5	-4667.2	1585.2
22.7889	1861.0	1810.4	-4626.2	1584.1
22.8086	1813.0	1809.4	-4673.2	1583.1
22.8283	1852.0	1808.4	-4633.1	1582.1
22.8480	1807.0	1807.3	-4677.1	1581.0
22.8677	1855.0	1806.3	-4628.0	1580.0
22.8874	1767.0	1805.2	-4715.0	1578.9
22.9071	1819.0	1804.2	-4661.9	1577.9
22.9268	1884.0	1803.1	-4595.9	1576.8
22.9465	1820.0	1802.1	-4658.8	1575.8
22.9662	1840.0	1801.0	-4637.8	1574.7
22.9859	1799.0	1800.0	-4677.7	1573.7
23.0056	1721.0	1798.9	-4754.7	1572.6
23.0253	1806.0	1797.9	-4668.6	1571.6
23.0450	1827.0	1796.8	-4646.6	1570.5
23.0647	1802.0	1795.8	-4670.5	1569.5
23.0845	1809.0	1794.7	-4662.5	1568.4
23.1042	1796.0	1793.7	-4674.4	1567.4
23.1239	1762.0	1792.6	-4707.4	1566.3
23.1436	1903.0	1791.6	-4565.3	1565.3
23.1633	1779.0	1790.5	-4688.3	1564.2
23.1830	1782.0	1789.5	-4684.2	1563.2
23.2027	1766.0	1788.4	-4699.2	1562.1
23.2224	1717.0	1787.4	-4747.2	1561.1
23.2421	1778.0	1786.0	-4684.7	1559.7
23.2618	1742.0	1784.6	-4719.3	1558.3
23.2815	1797.0	1783.2	-4662.9	1556.9
23.3012	1748.0	1781.8	-4710.5	1555.5
23.3209	1757.0	1780.4	-4700.1	1554.1
23.3406	1826.0	1779.0	-4629.7	1552.7
23.3603	1718.0	1777.6	-4736.3	1551.3
23.3800	1821.0	1776.1	-4631.9	1549.8
23.3997	1830.0	1774.7	-4621.5	1548.4
23.4194	1744.0	1773.3	-4706.1	1547.0
23.4392	1763.0	1771.9	-4685.7	1545.6
23.4589	1883.0	1770.5	-4564.3	1544.2
23.4786	1685.0	1769.1	-4760.9	1542.8
23.4983	1761.0	1767.7	-4683.4	1541.4
23.5180	1751.0	1766.3	-4692.0	1540.0
23.5377	1773.0	1764.9	-4668.6	1538.6
23.5574	1804.0	1763.5	-4636.2	1537.2
23.5771	1685.0	1762.1	-4753.8	1535.8
23.5968	1782.0	1760.7	-4655.4	1534.4
23.6165	1747.0	1759.3	-4689.0	1533.0
23.6362	1770.0	1757.8	-4664.6	1531.5
23.6559	1675.0	1756.4	-4758.2	1530.1
23.6756	1791.0	1755.0	-4640.8	1528.7
23.6953	1794.0	1753.6	-4636.4	1527.3
23.7150	1743.0	1752.2	-4686.0	1525.9
23.7347	1659.0	1750.8	-4768.6	1524.5
23.7544	1732.0	1749.4	-4694.2	1523.1
23.7741	1753.0	1748.0	-4671.8	1521.7
23.7938	1751.0	1746.6	-4672.3	1520.3
23.8136	1741.0	1745.2	-4680.9	1518.9
23.8333	1778.0	1743.8	-4642.5	1517.5
23.8530	1798.0	1742.4	-4621.1	1516.1
23.8727	1771.0	1741.0	-4646.7	1514.7
23.8924	1788.0	1739.6	-4628.3	1513.3
23.9121	1706.0	1738.1	-4708.9	1511.8
23.9318	1744.0	1736.7	-4669.5	1510.4
23.9515	1730.0	1735.3	-4682.1	1509.0
23.9712	1705.0	1733.9	-4705.7	1507.6
23.9909	1751.0	1732.5	-4658.3	1506.2
24.0106	1646.0	1735.6	-4766.3	1504.8
24.0303	1765.0	1734.5	-4646.2	1503.4
24.0500	1754.0	1733.4	-4656.2	1502.0
24.0697	1714.0	1732.4	-4695.2	1500.6
24.0894	1715.0	1731.5	-4693.2	1499.2
24.1091	1639.0	1730.6	-4768.4	1497.8
24.1288	1746.0	1730.4	-4661.2	1497.0
24.1485	1737.0	1730.3	-4670.0	1496.2
24.1683	1686.0	1730.3	-4721.0	1495.4
24.1880	1776.0	1730.4	-4631.1	1494.6
24.2077	1725.0	1730.7	-4682.4	1493.8
24.2274	1732.0	1731.1	-4675.8	1493.0
24.2471	1757.0	1731.8	-4651.5	1492.2
24.2668	1700.0	1732.7	-4709.5	1491.4
24.2865	1715.0	1734.1	-4695.8	1490.7
24.3062	1819.0	1735.9	-4593.6	1489.9
24.3259	1676.0	1738.3	-4739.1	1489.1
24.3456	1716.0	1741.6	-4702.4	1488.3
24.3653	1725.0	1746.1	-4697.9	1487.5
24.3850	1731.0	1752.3	-4698.0	1486.7
24.4047	1739.0	1761.0	-4698.7	1485.9
24.4244	1757.0	1773.5	-4693.3	1485.1
24.4441	1765.0	1793.2	-4704.9	1484.3
24.4638	1861.0	1832.1	-4647.9	1483.5
24.4835	2075.0	1938.7	-4540.4	1482.7
24.5032	2343.0	2249.8	-4583.6	1481.9
24.5230	2974.0	2976.9	-4679.6	1481.2
24.5427	4060.0	4113.8	-4730.6	1480.4
24.5624	4976.0	5062.5	-4763.2	1479.6
24.5821	4708.0	4871.3	-4840.0	1478.8
24.6018	3747.0	3764.7	-4694.4	1478.0
24.6215	2664.0	2714.7	-4727.4	1477.2
24.6412	2101.0	2123.7	-4699.4	1476.4
24.6609	1929.0	1888.8	-4636.5	1475.6
24.6806	1897.0	1808.7	-4588.4	1474.8
24.7003	1794.0	1776.0	-4658.8	1474.0
24.7200	1786.0	1757.4	-4648.1	1473.2
24.7397	1754.0	1744.5	-4667.3	1472.5
24.7594	1723.0	1735.1	-4688.8	1471.7
24.7791	1814.0	1727.9	-4590.6	1470.9
24.7988	1665.0	1722.2	-4733.9	1470.1
24.8185	1733.0	1717.5	-4661.3	1469.3
24.8382	1785.0	1713.7	-4605.5	1468.5
24.8579	1763.0	1710.5	-4624.2	1467.7
24.8777	1624.0	1707.7	-4760.4	1466.9
24.8974	1713.0	1705.2	-4669.0	1466.1
24.9171	1754.0	1703.0	-4625.8	1465.3
24.9368	1740.0	1701.1	-4637.8	1464.5
24.9565	1790.0	1699.3	-4586.0	1463.7
24.9762	1680.0	1697.6	-4694.4	1463.0
24.9959	1712.0	1696.1	-4660.8	1462.2
25.0156	1698.0	1694.6	-4673.4	1461.4
25.0353	1725.0	1693.3	-4645.0	1460.6
25.0550	1689.0	1692.0	-4679.7	1459.8
25.0747	1657.0	1690.7	-4710.5	1459.0
25.0944	1674.0	1689.5	-4692.3	1458.2
25.1141	1718.0	1688.4	-4647.1	1457.4
25.1338	1677.0	1687.3	-4687.0	1456.6
25.1535	1683.0	1682.1	-4675.9	1455.8
25.1732	1638.0	1681.3	-4720.1	1455.0
25.1929	1698.0	1680.6	-4659.3	1454.3
25.2126	1645.0	1679.8	-4711.5	1453.5
25.2324	1620.0	1679.0	-4735.7	1452.7
25.2521	1616.0	1678.2	-4738.9	1451.9
25.2718	1684.0	1677.4	-4670.1	1451.1
25.2915	1683.0	1676.6	-4670.3	1450.3
25.3112	1684.0	1675.8	-4668.6	1449.5
25.3309	1729.0	1675.0	-4622.8	1448.7
25.3506	1672.0	1674.2	-4679.0	1447.9
25.3703	1750.0	1673.4	-4600.2	1447.1
25.3900	1680.0	1672.6	-4669.4	1446.3
25.4097	1753.0	1671.8	-4595.6	1445.5
25.4294	1693.0	1671.1	-4654.8	1444.8
25.4491	1665.0	1670.3	-4682.0	1444.0
25.4688	1643.0	1669.5	-4703.2	1443.2
25.4885	1693.0	1668.7	-4652.4	1442.4
25.5082	1628.0	1667.9	-4716.6	1441.6
25.5279	1636.0	1667.1	-4707.8	1440.8
25.5476	1667.0	1666.3	-4676.1	1440.0
25.5673	1694.0	1665.5	-4648.3	1439.2
25.5871	1658.0	1664.7	-4683.5	1438.4
25.6068	1622.0	1663.9	-4718.7	1437.6
25.6265	1694.0	1663.1	-4645.9	1436.8
25.6462	1693.0	1662.3	-4646.1	1436.0
25.6659	1702.0	1661.6	-4636.3	1435.3
25.6856	1616.0	1660.8	-4721.5	1434.5
25.7053	1639.0	1660.0	-4697.7	1433.7
25.7250	1625.0	1659.2	-4710.9	1432.9
25.7447	1680.0	1658.4	-4655.1	1432.1
25.7644	1659.0	1657.6	-4675.4	1431.3
25.7841	1681.0	1656.8	-4652.6	1430.5
25.8038	1622.0	1656.0	-4710.8	1429.7
25.8235	1661.0	1655.2	-4671.0	1428.9
25.8432	1618.0	1654.4	-4713.2	1428.1
25.8629	1626.0	1653.6	-4704.4	1427.3
25.8826	1623.0	1652.9	-4706.6	1426.6
25.9023	1669.0	1652.1	-4659.8	1425.8
25.9220	1653.0	1651.3	-4675.0	1425.0
25.9417	1598.0	1650.5	-4729.2	1424.2
25.9615	1638.0	1649.7	-4688.4	1423.4
25.9812	1561.0	1648.9	-4764.6	1422.6
26.0009	1667.0	1648.1	-4657.9	1421.8
26.0206	1594.0	1647.3	-4730.1	1421.0
26.0403	1659.0	1646.5	-4664.3	1420.2
26.0600	1705.0	1645.7	-4617.5	1419.4
26.0797	1622.0	1644.9	-4699.7	1418.6
26.0994	1613.0	1644.1	-4707.9	1417.8
26.1191	1658.0	1643.4	-4662.1	1417.1
26.1388	1593.0	1642.6	-4726.3	1416.3
26.1585	1554.0	1641.8	-4764.5	1415.5
26.1782	1628.0	1640.8	-4689.6	1414.5
26.1979	1721.0	1639.9	-4595.7	1413.6
26.2176	1607.0	1639.0	-4708.7	1412.7
26.2373	1675.0	1638.0	-4639.8	1411.7
26.2570	1707.0	1637.1	-4606.8	1410.8
26.2767	1701.0	1636.2	-4611.9	1409.9
26.2964	1575.0	1635.2	-4737.0	1408.9
26.3162	1658.0	1634.3	-4653.0	1408.0
26.3359	1582.0	1633.3	-4728.1	1407.0
26.3556	1638.0	1632.4	-4671.2	1406.1
26.3753	1679.0	1631.5	-4629.2	1405.2
26.3950	1632.0	1630.5	-4675.3	1404.2
26.4147	1631.0	1629.6	-4675.3	1403.3
26.4344	1585.0	1628.7	-4720.4	1402.4
26.4541	1582.0	1627.7	-4722.5	1401.4
26.4738	1644.0	1626.8	-4659.5	1400.5
26.4935	1635.0	1625.8	-4667.6	1399.5
26.5132	1579.0	1624.9	-4722.7	1398.6
26.5329	1620.0	1624.0	-4680.7	1397.7
26.5526	1725.0	1623.0	-4574.8	1396.7
26.5723	1577.0	1622.1	-4721.9	1395.8
26.5920	1627.0	1621.2	-4670.9	1394.9
26.6117	1606.0	1620.2	-4691.0	1393.9
26.6314	1623.0	1619.3	-4673.0	1393.0
26.6511	1622.0	1618.4	-4673.1	1392.1
26.6709	1618.0	1617.4	-4676.2	1391.1
26.6906	1600.0	1616.5	-4693.2	1390.2
26.7103	1645.0	1615.5	-4647.3	1389.2
26.7300	1620.0	1614.6	-4671.4	1388.3
26.7497	1576.0	1613.7	-4714.4	1387.4
26.7694	1624.0	1612.7	-4665.5	1386.4
26.7891	1507.0	1611.8	-4781.5	1385.5
26.8088	1575.0	1610.9	-4712.6	1384.6
26.8285	1602.0	1609.9	-4684.7	1383.6
26.8482	1616.0	1609.0	-4669.7	1382.7
26.8679	1586.0	1608.0	-4698.8	1381.7
26.8876	1638.0	1607.1	-4645.9	1380.8
26.9073	1609.0	1606.2	-4673.9	1379.9
26.9270	1615.0	1605.2	-4667.0	1378.9
26.9467	1658.0	1604.3	-4623.1	1378.0
26.9664	1632.0	1603.4	-4648.1	1377.1
26.9861	1714.0	1602.4	-4565.2	1376.1
27.0058	1739.0	1601.5	-4539.2	1375.2
27.0256	1664.0	1600.6	-4613.3	1374.2
27.0453	1659.0	1599.6	-4617.4	1373.3
27.0650	1700.0	1598.7	-4575.4	1372.4
27.0847	1668.0	1597.7	-4606.5	1371.4
27.1044	1650.0	1596.8	-4623.6	1370.5
27.1241	1573.0	1595.9	-4699.6	1369.6
27.1438	1594.0	1594.9	-4677.7	1368.6
27.1635	1625.0	1594.0	-4645.7	1367.7
27.1832	1615.0	1593.1	-4654.8	1366.8
27.2029	1619.0	1592.1	-4649.9	1365.8
27.2226	1579.0	1591.2	-4688.9	1364.9
27.2423	1580.0	1590.2	-4687.0	1363.9
27.2620	1595.0	1589.3	-4671.1	1363.0
27.2817	1620.0	1588.4	-4645.1	1362.1
27.3014	1544.0	1587.4	-4720.2	1361.1
27.3211	1610.0	1586.5	-4653.3	1360.2
27.3408	1548.0	1585.6	-4714.3	1359.3
27.3605	1607.0	1584.6	-4654.4	1358.3
27.3803	1648.0	1583.7	-4612.4	1357.4
27.4000	1572.0	1582.8	-4687.5	1356.5
27.4197	1523.0	1581.8	-4735.6	1355.5
27.4394	1587.0	1580.9	-4670.6	1354.6
27.4591	1552.0	1579.9	-4704.7	1353.6
27.4788	1499.0	1579.0	-4756.8	1352.7
27.4985	1522.0	1578.4	-4733.2	1352.1
27.5182	1513.0	1577.9	-4741.6	1351.6
27.5379	1535.0	1577.3	-4719.0	1351.0
27.5576	1548.0	1576.7	-4705.5	1350.4
27.5773	1562.0	1576.1	-4690.9	1349.8
27.5970	1534.0	1575.6	-4718.3	1349.3
27.6167	1575.0	1575.0	-4676.7	1348.7
27.6364	1550.0	1574.4	-4701.2	1348.1
27.6561	1626.0	1573.8	-4624.6	1347.5
27.6758	1570.0	1573.3	-4680.0	1347.0
27.6955	1573.0	1572.7	-4676.4	1346.4
27.7152	1607.0	1572.1	-4641.9	1345.8
27.7350	1548.0	1571.5	-4700.3	1345.2
27.7547	1523.0	1571.0	-4724.7	1344.7
27.7744	1614.0	1570.4	-4633.1	1344.1
27.7941	1547.0	1569.8	-4699.6	1343.5
27.8138	1508.0	1569.2	-4738.0	1342.9
27.8335	1518.0	1568.7	-4727.4	1342.4
27.8532	1604.0	1568.1	-4640.8	1341.8
27.8729	1578.0	1567.5	-4666.3	1341.2
27.8926	1541.0	1566.9	-4702.7	1340.6
27.9123	1551.0	1566.4	-4692.1	1340.1
27.9320	1558.0	1565.8	-4684.5	1339.5
27.9517	1562.0	1565.2	-4680.0	1338.9
27.9714	1536.0	1564.6	-4705.4	1338.3
27.9911	1526.0	1564.1	-4714.8	1337.8
28.0108	1564.0	1563.5	-4676.2	1337.2
28.0305	1650.0	1562.9	-4589.7	1336.6
28.0502	1563.0	1562.4	-4676.1	1336.0
28.0699	1589.0	1561.8	-4649.5	1335.5
28.0896	1587.0	1561.2	-4651.0	1334.9
28.1094	1590.0	1560.6	-4647.4	1334.3
28.1291	1527.0	1560.1	-4709.8	1333.7
28.1488	1498.0	1559.5	-4738.2	1333.2
28.1685	1611.0	1558.9	-4624.7	1332.6
28.1882	1528.0	1558.3	-4707.1	1332.0
28.2079	1485.0	1557.8	-4749.5	1331.5
28.2276	1539.0	1557.2	-4694.9	1330.9
28.2473	1528.0	1556.6	-4705.4	1330.3
28.2670	1564.0	1556.0	-4668.8	1329.7
28.2867	1536.0	1555.5	-4696.2	1329.2
28.3064	1584.0	1554.9	-4647.6	1328.6
28.3261	1529.0	1554.3	-4702.1	1328.0
28.3458	1516.0	1556.9	-4717.6	1327.4
28.3655	1600.0	1556.5	-4633.3	1326.9
28.3852	1565.0	1556.2	-4667.9	1326.3
28.4049	1526.0	1555.9	-4706.6	1325.7
28.4246	1538.0	1555.6	-4694.4	1325.1
28.4443	1594.0	1555.4	-4638.1	1324.6
28.4641	1529.0	1555.2	-4702.9	1324.0
28.4838	1560.0	1555.0	-4671.8	1323.4
28.5035	1553.0	1555.0	-4678.7	1322.8
28.5232	1601.0	1554.9	-4630.7	1322.3
28.5429	1506.0	1555.0	-4725.8	1321.7
28.5626	1597.0	1555.2	-4634.9	1321.1
28.5823	1559.0	1555.5	-4673.2	1320.5
28.6020	1512.0	1555.9	-4720.7	1320.0
28.6217	1537.0	1556.5	-4696.3	1319.4
28.6414	1551.0	1557.4	-4683.2	1318.8
28.6611	1541.0	1558.6	-4694.4	1318.2
28.6808	1477.0	1560.2	-4759.9	1317.7
28.7005	1531.0	1562.3	-4708.1	1317.1
28.7202	1580.0	1565.2	-4661.9	1316.5
28.7399	1522.0	1569.1	-4723.8	1315.9
28.7596	1544.0	1574.4	-4707.1	1315.4
28.7793	1623.0	1581.8	-4635.6	1314.8
28.7990	1624.0	1592.7	-4645.5	1314.2
28.8188	1653.0	1610.7	-4634.5	1313.6
28.8385	1776.0	1648.9	-4549.7	1313.1
28.8582	2049.0	1750.5	-4378.3	1312.5
28.8779	2231.0	2010.6	-4456.4	1311.9
28.8976	2732.0	2528.6	-4473.3	1311.3
28.9173	3521.0	3231.8	-4387.6	1310.8
28.9370	4164.0	3695.9	-4208.6	1310.2
28.9567	3853.0	3437.4	-4261.2	1309.6
28.9764	2856.0	2745.7	-4566.4	1309.1
28.9961	2196.0	2144.3	-4625.0	1308.5
29.0158	1805.0	1806.9	-4678.6	1307.9
29.0355	1657.0	1665.8	-4685.5	1307.3
29.0552	1587.0	1613.0	-4702.7	1306.8
29.0749	1568.0	1589.6	-4698.4	1306.2
29.0946	1555.0	1575.9	-4697.6	1305.6
29.1143	1532.0	1566.4	-4711.1	1305.0
29.1340	1575.0	1559.3	-4661.1	1304.5
29.1537	1482.0	1553.9	-4748.6	1303.9
29.1735	1512.0	1549.6	-4714.3	1303.3
29.1932	1560.0	1546.1	-4662.8	1302.7
29.2129	1377.0	1543.2	-4842.9	1302.2
29.2326	1501.0	1540.4	-4716.2	1301.3
29.2523	1459.0	1538.0	-4755.8	1300.4
29.2720	1433.0	1535.9	-4779.6	1299.6
29.2917	1511.0	1533.9	-4699.7	1298.7
29.3114	1430.0	1532.1	-4778.9	1297.8
29.3311	1474.0	1530.5	-4733.2	1296.9
29.3508	1507.0	1528.9	-4698.7	1296.1
29.3705	1547.0	1527.5	-4657.2	1295.2
29.3902	1483.0	1526.1	-4719.9	1294.3
29.4099	1578.0	1524.8	-4623.6	1293.5
29.4296	1544.0	1523.5	-4656.3	1292.6
29.4493	1491.0	1522.3	-4708.1	1291.7
29.4690	1512.0	1521.1	-4685.9	1290.9
29.4887	1482.0	1520.0	-4714.7	1290.0
29.5084	1520.0	1518.9	-4675.6	1289.1
29.5282	1525.0	1517.8	-4669.5	1288.3
29.5479	1479.0	1513.7	-4711.4	1287.4
29.5676	1506.0	1512.8	-4683.6	1286.5
29.5873	1508.0	1511.9	-4680.7	1285.6
29.6070	1492.0	1511.1	-4695.8	1284.8
29.6267	1476.0	1510.2	-4711.0	1283.9
29.6464	1445.0	1509.3	-4741.1	1283.0
29.6661	1479.0	1508.5	-4706.2	1282.2
29.6858	1445.0	1507.6	-4739.4	1281.3
29.7055	1507.0	1506.7	-4676.5	1280.4
29.7252	1458.0	1505.9	-4724.6	1279.6
29.7449	1568.0	1505.0	-4613.7	1278.7
29.7646	1478.0	1504.1	-4702.9	1277.8
29.7843	1487.0	1503.3	-4693.0	1277.0
29.8040	1545.0	1502.4	-4634.1	1276.1
29.8237	1545.0	1501.5	-4633.3	1275.2
29.8434	1463.0	1500.7	-4714.4	1274.4
29.8631	1524.0	1499.8	-4652.5	1273.5
29.8828	1464.0	1498.9	-4711.7	1272.6
29.9026	1500.0	1498.0	-4674.8	1271.7
29.9223	1569.0	1497.2	-4604.9	1270.9
29.9420	1480.0	1496.3	-4693.1	1270.0
29.9617	1492.0	1495.4	-4680.2	1269.1
29.9814	1490.0	1494.6	-4681.3	1268.3
30.0011	1551.0	1493.7	-4619.4	1267.4
30.0208	1587.0	1492.8	-4582.6	1266.5
30.0405	1561.0	1492.0	-4607.7	1265.7
30.0602	1614.0	1491.1	-4553.8	1264.8
30.0799	1573.0	1490.2	-4594.0	1263.9
30.0996	1559.0	1489.4	-4607.1	1263.1
30.1193	1553.0	1488.5	-4612.2	1262.2
30.1390	1500.0	1487.6	-4664.4	1261.3
30.1587	1542.0	1486.7	-4621.5	1260.4
30.1784	1507.0	1485.9	-4655.6	1259.6
30.1981	1507.0	1485.0	-4654.8	1258.7
30.2178	1429.0	1484.1	-4731.9	1257.8
30.2375	1455.0	1483.3	-4705.0	1257.0
30.2573	1518.0	1482.4	-4641.1	1256.1
30.2770	1477.0	1481.5	-4681.3	1255.2
30.2967	1431.0	1480.7	-4726.4	1254.4
30.3164	1474.0	1479.8	-4682.5	1253.5
30.3361	1476.0	1478.9	-4679.7	1252.6
30.3558	1433.0	1478.1	-4721.8	1251.8
30.3755	1447.0	1477.2	-4706.9	1250.9
30.3952	1490.0	1476.3	-4663.1	1250.0
30.4149	1455.0	1475.4	-4697.2	1249.1
30.4346	1425.0	1474.6	-4726.3	1248.3
30.4543	1539.0	1473.7	-4611.5	1247.4
30.4740	1453.0	1472.8	-4696.6	1246.5
30.4937	1466.0	1472.0	-4682.7	1245.7
30.5134	1389.0	1471.1	-4758.9	1244.8
30.5331	1457.0	1470.2	-4689.9	1243.9
30.5528	1459.0	1469.3	-4687.0	1243.0
30.5725	1439.0	1468.4	-4706.1	1242.1
30.5922	1455.0	1467.5	-4689.2	1241.2
30.6120	1468.0	1466.6	-4675.3	1240.3
30.6317	1433.0	1465.7	-4709.4	1239.4
30.6514	1519.0	1464.8	-4622.5	1238.5
30.6711	1422.0	1463.8	-4718.6	1237.5
30.6908	1449.0	1462.9	-4690.7	1236.6
30.7105	1513.0	1462.0	-4625.8	1235.7
30.7302	1442.0	1461.1	-4695.9	1234.8
30.7499	1446.0	1460.2	-4691.0	1233.9
30.7696	1484.0	1459.3	-4652.1	1233.0
30.7893	1401.0	1458.4	-4734.2	1232.1
30.8090	1448.0	1457.5	-4686.3	1231.2
30.8287	1535.0	1456.6	-4598.3	1230.3
30.8484	1390.0	1455.7	-4742.4	1229.4
30.8681	1395.0	1454.8	-4736.5	1228.5
30.8878	1422.0	1453.9	-4708.6	1227.6
30.9075	1460.0	1453.0	-4669.7	1226.7
30.9272	1428.0	1452.1	-4700.8	1225.8
30.9469	1485.0	1451.2	-4642.9	1224.9
30.9667	1516.0	1450.2	-4611.0	1223.9
30.9864	1454.0	1449.3	-4672.1	1223.0
31.0061	1457.0	1448.4	-4668.2	1222.1
31.0258	1404.0	1447.5	-4720.3	1221.2
31.0455	1445.0	1446.6	-4678.4	1220.3
31.0652	1462.0	1445.7	-4660.5	1219.4
31.0849	1425.0	1444.8	-4696.6	1218.5
31.1046	1487.0	1443.9	-4633.7	1217.6
31.1243	1414.0	1443.0	-4705.8	1216.7
31.1440	1488.0	1442.1	-4630.8	1215.8
31.1637	1461.0	1441.2	-4656.9	1214.9
31.1834	1562.0	1440.3	-4555.0	1214.0
31.2031	1511.0	1439.4	-4605.1	1213.1
31.2228	1480.0	1438.5	-4635.2	1212.2
31.2425	1453.0	1437.6	-4661.3	1211.3
31.2622	1455.0	1436.7	-4658.4	1210.4
31.2819	1418.0	1435.7	-4694.5	1209.4
31.3016	1393.0	1434.8	-4718.6	1208.5
31.3214	1428.0	1433.9	-4682.7	1207.6
31.3411	1444.0	1433.0	-4665.8	1206.7
31.3608	1427.0	1432.1	-4681.9	1205.8
31.3805	1477.0	1431.2	-4631.0	1204.9
31.4002	1387.0	1430.3	-4720.1	1204.0
31.4199	1442.0	1429.7	-4664.4	1203.4
31.4396	1442.0	1429.0	-4663.8	1202.7
31.4593	1429.0	1428.4	-4676.2	1202.1
31.4790	1444.0	1427.8	-4660.5	1201.5
31.4987	1455.0	1454.0	-4675.8	1200.8
31.5184	1452.0	1455.2	-4680.0	1200.2
31.5381	1469.0	1456.6	-4664.3	1199.6
31.5578	1440.0	1458.2	-4694.9	1198.9
31.5775	1419.0	1460.0	-4717.8	1198.3
31.5972	1402.0	1462.2	-4736.9	1197.7
31.6169	1457.0	1464.7	-4684.4	1197.0
31.6366	1506.0	1467.5	-4638.3	1196.4
31.6563	1469.0	1470.9	-4678.6	1195.8
31.6761	1459.0	1474.8	-4692.5	1195.1
31.6958	1537.0	1479.3	-4619.1	1194.5
31.7155	1478.0	1484.7	-4683.4	1193.9
31.7352	1510.0	1491.0	-4657.7	1193.2
31.7549	1557.0	1498.5	-4618.2	1192.6
31.7746	1574.0	1507.4	-4610.1	1192.0
31.7943	1483.0	1518.1	-4711.9	1191.3
31.8140	1493.0	1531.2	-4715.0	1190.7
31.8337	1482.0	1547.3	-4742.0	1190.1
31.8534	1558.0	1567.2	-4686.0	1189.4
31.8731	1494.0	1592.4	-4775.1	1188.8
31.8928	1526.0	1624.6	-4775.4	1188.2
31.9125	1665.0	1666.8	-4678.6	1187.5
31.9322	1692.0	1723.3	-4708.1	1186.9
31.9519	1794.0	1801.5	-4684.3	1186.3
31.9716	1975.0	1917.0	-4618.8	1185.6
31.9913	2344.0	2117.8	-4450.5	1185.0
32.0110	3104.0	2567.2	-4140.0	1184.4
32.0307	4214.0	3707.8	-4170.5	1183.7
32.0505	6554.0	6305.3	-4428.1	1183.1
32.0702	10727.0	10756.7	-4706.4	1182.4
32.0899	16095.0	15834.3	-4416.0	1181.8
32.1096	18707.0	17849.4	-3819.2	1181.2
32.1293	14929.0	14594.0	-4341.8	1180.5
32.1490	9321.0	9416.2	-4771.9	1179.9
32.1687	5066.0	5431.6	-5042.3	1179.3
32.1884	3251.0	3299.5	-4725.3	1178.6
32.2081	2397.0	2401.5	-4681.2	1178.0
32.2278	1998.0	2043.8	-4722.5	1177.4
32.2475	1763.0	1872.6	-4786.4	1176.7
32.2672	1731.0	1768.1	-4713.9	1176.1
32.2869	1628.0	1695.3	-4744.1	1175.5
32.3066	1546.0	1641.8	-4772.6	1174.8
32.3263	1483.0	1601.3	-4795.0	1174.2
32.3460	1460.0	1569.8	-4786.6	1173.6
32.3657	1489.0	1544.9	-4732.7	1172.9
32.3854	1525.0	1524.8	-4676.6	1172.3
32.4052	1511.0	1508.3	-4674.0	1171.7
32.4249	1463.0	1494.6	-4708.4	1171.0
32.4446	1383.0	1483.1	-4776.9	1170.4
32.4643	1434.0	1473.3	-4716.1	1169.8
32.4840	1485.0	1464.9	-4656.7	1169.1
32.5037	1413.0	1457.6	-4721.4	1168.5
32.5234	1462.0	1451.3	-4666.0	1167.9
32.5431	1375.0	1445.6	-4747.4	1167.2
32.5628	1406.0	1440.6	-4711.4	1166.6
32.5825	1448.0	1436.1	-4664.9	1166.0
32.6022	1445.0	1432.1	-4663.9	1165.3
32.6219	1485.0	1428.5	-4620.2	1164.7
32.6416	1375.0	1425.1	-4726.9	1164.1
32.6613	1446.0	1422.1	-4652.8	1163.4
32.6810	1459.0	1419.3	-4637.0	1162.8
32.7007	1439.0	1416.7	-4654.4	1162.2
32.7204	1468.0	1414.3	-4623.0	1161.5
32.7401	1437.0	1387.2	-4626.9	1160.9
32.7599	1525.0	1386.6	-4538.3	1160.2
32.7796	1383.0	1385.9	-4679.7	1159.6
32.7993	1424.0	1385.3	-4638.0	1159.0
32.8190	1419.0	1405.5	-4663.3	1158.3
32.8387	1442.0	1406.3	-4641.1	1157.7
32.8584	1402.0	1407.3	-4682.0	1157.1
32.8781	1403.0	1408.4	-4682.1	1156.4
32.8978	1412.0	1409.7	-4674.4	1155.8
32.9175	1427.0	1411.2	-4660.9	1155.2
32.9372	1369.0	1413.0	-4720.7	1154.5
32.9569	1400.0	1415.1	-4691.8	1153.9
32.9766	1395.0	1417.5	-4699.3	1153.3
32.9963	1414.0	1420.4	-4683.1	1152.6
33.0160	1418.0	1423.8	-4682.5	1152.0
33.0357	1430.0	1427.8	-4674.5	1151.4
33.0554	1381.0	1432.6	-4728.3	1150.7
33.0751	1337.0	1438.2	-4778.0	1150.1
33.0948	1477.0	1445.0	-4644.8	1149.5
33.1146	1504.0	1453.3	-4626.0	1148.8
33.1343	1403.0	1463.3	-4737.1	1148.2
33.1540	1362.0	1475.7	-4790.4	1147.6
33.1737	1484.0	1491.0	-4683.8	1146.9
33.1934	1492.0	1510.5	-4695.2	1146.3
33.2131	1482.0	1535.5	-4730.2	1145.7
33.2328	1513.0	1568.2	-4731.9	1145.0
33.2525	1547.0	1612.0	-4741.7	1144.4
33.2722	1727.0	1672.8	-4622.5	1143.8
33.2919	1684.0	1763.1	-4755.8	1143.1
33.3116	1934.0	1921.3	-4664.0	1142.5
33.3313	2296.0	2273.7	-4654.4	1141.9
33.3510	3170.0	3147.3	-4654.1	1141.2
33.3707	4748.0	5066.9	-4995.6	1140.6
33.3904	8052.0	8295.1	-4919.8	1140.0
33.4101	11888.0	11920.9	-4709.7	1139.3
33.4298	13103.0	13313.2	-4887.0	1138.7
33.4495	10520.0	10953.3	-5110.1	1138.1
33.4693	7144.0	7224.1	-4756.9	1137.4
33.4890	4492.0	4358.0	-4542.8	1136.8
33.5087	3167.0	2800.1	-4309.8	1136.2
33.5284	2423.0	2128.5	-4382.3	1135.5
33.5481	2024.0	1855.0	-4507.7	1134.9
33.5678	1847.0	1722.9	-4552.6	1134.3
33.5875	1666.0	1642.2	-4653.0	1133.6
33.6072	1627.0	1586.0	-4635.8	1133.0
33.6269	1628.0	1544.7	-4593.4	1132.3
33.6466	1472.0	1513.3	-4718.0	1131.7
33.6663	1437.0	1488.8	-4728.6	1131.1
33.6860	1506.0	1469.5	-4640.2	1130.4
33.7057	1472.0	1453.8	-4658.5	1129.8
33.7254	1329.0	1440.9	-4788.7	1129.2
33.7451	1427.0	1430.3	-4680.1	1128.7
33.7648	1391.0	1421.4	-4707.2	1128.1
33.7845	1407.0	1413.8	-4683.6	1127.6
33.8042	1422.0	1407.3	-4662.0	1127.1
33.8239	1357.0	1401.6	-4721.3	1126.6
33.8437	1343.0	1396.6	-4730.4	1126.1
33.8634	1392.0	1392.2	-4677.0	1125.6
33.8831	1425.0	1388.3	-4640.1	1125.0
33.9028	1441.0	1384.8	-4620.6	1124.5
33.9225	1329.0	1381.7	-4729.4	1124.0
33.9422	1380.0	1378.8	-4675.6	1123.5
33.9619	1419.0	1376.2	-4634.0	1123.0
33.9816	1398.0	1373.8	-4652.6	1122.4
34.0013	1378.0	1371.6	-4670.4	1121.9
34.0210	1353.0	1369.6	-4693.3	1121.4
34.0407	1343.0	1367.7	-4701.4	1120.9
34.0604	1376.0	1346.7	-4647.4	1120.4
34.0801	1387.0	1346.2	-4635.9	1119.9
34.0998	1305.0	1345.6	-4717.4	1119.3
34.1195	1302.0	1345.1	-4719.9	1118.8
34.1392	1309.0	1344.6	-4712.4	1118.3
34.1589	1325.0	1344.1	-4695.8	1117.8
34.1786	1357.0	1343.6	-4663.3	1117.3
34.1984	1365.0	1343.0	-4654.8	1116.7
34.2181	1328.0	1342.5	-4691.3	1116.2
34.2378	1353.0	1342.0	-4665.8	1115.7
34.2575	1372.0	1341.5	-4646.2	1115.2
34.2772	1299.0	1341.0	-4718.7	1114.7
34.2969	1379.0	1340.5	-4638.2	1114.2
34.3166	1348.0	1339.9	-4668.7	1113.6
34.3363	1370.0	1339.4	-4646.2	1113.1
34.3560	1361.0	1338.9	-4654.7	1112.6
34.3757	1420.0	1338.4	-4595.1	1112.1
34.3954	1342.0	1337.9	-4672.6	1111.6
34.4151	1338.0	1337.4	-4676.1	1111.1
34.4348	1329.0	1336.8	-4684.6	1110.5
34.4545	1353.0	1336.3	-4660.1	1110.0
34.4742	1335.0	1335.8	-4677.5	1109.5
34.4939	1326.0	1335.3	-4686.0	1109.0
34.5136	1310.0	1334.8	-4701.5	1108.5
34.5333	1376.0	1334.2	-4635.0	1107.9
34.5531	1378.0	1333.7	-4632.5	1107.4
34.5728	1318.0	1333.2	-4692.0	1106.9
34.5925	1420.0	1332.7	-4589.4	1106.4
34.6122	1320.0	1332.2	-4688.9	1105.9
34.6319	1327.0	1331.7	-4681.4	1105.4
34.6516	1297.0	1331.1	-4710.9	1104.8
34.6713	1305.0	1330.6	-4702.4	1104.3
34.6910	1316.0	1330.1	-4690.9	1103.8
34.7107	1365.0	1329.6	-4641.3	1103.3
34.7304	1357.0	1329.1	-4648.8	1102.8
34.7501	1332.0	1328.5	-4673.3	1102.2
34.7698	1338.0	1328.0	-4666.8	1101.7
34.7895	1381.0	1327.5	-4623.3	1101.2
34.8092	1289.0	1327.0	-4714.7	1100.7
34.8289	1272.0	1326.5	-4731.2	1100.2
34.8486	1350.0	1326.0	-4652.7	1099.7
34.8683	1283.0	1325.4	-4719.2	1099.1
34.8880	1339.0	1324.9	-4662.7	1098.6
34.9078	1332.0	1324.4	-4669.2	1098.1
34.9275	1359.0	1323.9	-4641.6	1097.6
34.9472	1330.0	1323.4	-4670.1	1097.1
34.9669	1343.0	1322.8	-4656.6	1096.5
34.9866	1386.0	1322.3	-4613.1	1096.0
35.0063	1300.0	1321.8	-4698.6	1095.5
35.0260	1334.0	1321.3	-4664.0	1095.0
35.0457	1311.0	1320.8	-4686.5	1094.5
35.0654	1331.0	1320.3	-4666.0	1094.0
35.0851	1342.0	1319.7	-4654.5	1093.4
35.1048	1355.0	1319.2	-4641.0	1092.9
35.1245	1373.0	1318.7	-4622.5	1092.4
35.1442	1277.0	1318.2	-4717.9	1091.9
35.1639	1319.0	1317.7	-4675.4	1091.4
35.1836	1309.0	1317.2	-4684.9	1090.8
35.2033	1313.0	1316.6	-4680.4	1090.3
35.2230	1330.0	1316.1	-4662.9	1089.8
35.2427	1263.0	1315.6	-4729.3	1089.3
35.2625	1296.0	1315.0	-4695.8	1088.7
35.2822	1259.0	1314.4	-4732.2	1088.1
35.3019	1328.0	1313.8	-4662.6	1087.5
35.3216	1299.0	1313.2	-4691.0	1086.9
35.3413	1307.0	1312.6	-4682.4	1086.3
35.3610	1304.0	1312.0	-4684.8	1085.7
35.3807	1321.0	1311.4	-4667.2	1085.1
35.4004	1304.0	1310.9	-4683.6	1084.6
35.4201	1299.0	1310.3	-4688.0	1084.0
35.4398	1300.0	1309.7	-4686.4	1083.4
35.4595	1232.0	1309.1	-4753.8	1082.8
35.4792	1312.0	1308.5	-4673.2	1082.2
35.4989	1287.0	1307.9	-4697.6	1081.6
35.5186	1291.0	1307.3	-4693.0	1081.0
35.5383	1283.0	1306.7	-4700.5	1080.4
35.5580	1347.0	1306.1	-4635.9	1079.8
35.5777	1257.0	1305.5	-4725.3	1079.2
35.5974	1306.0	1304.9	-4675.7	1078.6
35.6172	1332.0	1304.3	-4649.1	1078.0
35.6369	1272.0	1303.7	-4708.5	1077.4
35.6566	1293.0	1303.1	-4686.9	1076.8
35.6763	1320.0	1302.6	-4659.3	1076.2
35.6960	1319.0	1302.0	-4659.7	1075.7
35.7157	1357.0	1301.4	-4621.1	1075.1
35.7354	1300.0	1300.8	-4677.5	1074.5
35.7551	1302.0	1300.2	-4674.9	1073.9
35.7748	1258.0	1299.6	-4718.3	1073.3
35.7945	1364.0	1299.0	-4611.7	1072.7
35.8142	1286.0	1298.4	-4689.2	1072.1
35.8339	1302.0	1297.8	-4672.6	1071.5
35.8536	1281.0	1297.2	-4693.0	1070.9
35.8733	1328.0	1296.6	-4645.4	1070.3
35.8930	1292.0	1296.0	-4680.8	1069.7
35.9127	1311.0	1296.0	-4661.7	1069.1
35.9324	1279.0	1295.4	-4693.2	1068.5
35.9521	1238.0	1294.8	-4733.6	1068.0
35.9718	1243.0	1294.3	-4728.0	1067.4
35.9916	1269.0	1293.7	-4701.5	1066.8
36.0113	1299.0	1293.2	-4671.0	1066.2
36.0310	1292.0	1292.7	-4677.4	1065.6
36.0507	1300.0	1292.1	-4668.9	1065.0
36.0704	1270.0	1291.6	-4698.4	1064.4
36.0901	1346.0	1291.1	-4621.9	1063.8
36.1098	1274.0	1290.6	-4693.4	1063.2
36.1295	1343.0	1290.1	-4623.9	1062.6
36.1492	1298.0	1289.7	-4668.4	1062.0
36.1689	1249.0	1289.2	-4716.9	1061.4
36.1886	1342.0	1288.8	-4623.5	1060.8
36.2083	1267.0	1288.4	-4698.1	1060.2
36.2280	1284.0	1288.0	-4680.8	1059.6
36.2477	1313.0	1287.7	-4651.4	1059.1
36.2674	1296.0	1287.4	-4668.2	1058.5
36.2871	1338.0	1287.3	-4626.0	1057.9
36.3068	1264.0	1287.2	-4699.9	1057.3
36.3265	1241.0	1287.2	-4723.0	1056.7
36.3463	1348.0	1287.5	-4616.2	1056.1
36.3660	1253.0	1288.0	-4711.8	1055.5
36.3857	1269.0	1289.0	-4696.7	1054.9
36.4054	1257.0	1290.6	-4710.4	1054.3
36.4251	1309.0	1293.8	-4661.5	1053.7
36.4448	1296.0	1301.0	-4681.8	1053.1
36.4645	1341.0	1318.8	-4654.6	1052.5
36.4842	1331.0	1357.9	-4703.7	1051.9
36.5039	1554.0	1425.8	-4548.5	1051.3
36.5236	1552.0	1508.9	-4633.6	1050.8
36.5433	1615.0	1556.0	-4617.8	1050.2
36.5630	1569.0	1518.5	-4626.2	1049.6
36.5827	1431.0	1435.3	-4681.1	1049.0
36.6024	1362.0	1362.5	-4677.2	1048.4
36.6221	1304.0	1318.2	-4691.0	1047.8
36.6418	1225.0	1296.9	-4748.6	1047.2
36.6615	1280.0	1287.8	-4684.5	1046.9
36.6812	1292.0	1283.3	-4668.1	1046.6
36.7010	1288.0	1280.6	-4669.4	1046.3
36.7207	1313.0	1278.7	-4642.5	1046.0
36.7404	1287.0	1277.3	-4667.0	1045.7
36.7601	1256.0	1276.1	-4696.9	1045.5
36.7798	1230.0	1275.2	-4721.9	1045.2
36.7995	1288.0	1274.3	-4663.1	1044.9
36.8192	1239.0	1273.6	-4711.4	1044.6
36.8389	1241.0	1273.0	-4708.7	1044.3
36.8586	1288.0	1272.4	-4661.2	1044.0
36.8783	1292.0	1271.9	-4656.6	1043.7
36.8980	1291.0	1271.4	-4657.1	1043.4
36.9177	1232.0	1270.9	-4715.7	1043.1
36.9374	1270.0	1270.5	-4677.2	1042.8
36.9571	1251.0	1270.1	-4695.8	1042.6
36.9768	1258.0	1269.7	-4688.4	1042.3
36.9965	1194.0	1269.3	-4752.1	1042.0
37.0162	1234.0	1268.9	-4711.7	1041.7
37.0359	1228.0	1268.6	-4717.3	1041.4
37.0557	1283.0	1268.2	-4662.0	1041.1
37.0754	1261.0	1267.9	-4683.6	1040.8
37.0951	1349.0	1267.5	-4595.3	1040.5
37.1148	1327.0	1267.2	-4616.9	1040.2
37.1345	1360.0	1266.9	-4583.6	1040.0
37.1542	1223.0	1266.5	-4720.3	1039.7
37.1739	1259.0	1266.2	-4684.0	1039.4
37.1936	1269.0	1265.4	-4673.1	1039.1
37.2133	1226.0	1265.1	-4715.8	1038.8
37.2330	1275.0	1264.8	-4666.6	1038.5
37.2527	1293.0	1264.5	-4648.3	1038.2
37.2724	1261.0	1264.2	-4680.0	1037.9
37.2921	1247.0	1263.9	-4693.7	1037.6
37.3118	1288.0	1263.6	-4652.4	1037.3
37.3315	1236.0	1263.4	-4704.1	1037.1
37.3512	1289.0	1263.1	-4650.8	1036.8
37.3709	1274.0	1262.8	-4665.5	1036.5
37.3906	1176.0	1262.5	-4763.2	1036.2
37.4104	1297.0	1262.2	-4641.9	1035.9
37.4301	1242.0	1261.8	-4696.6	1035.5
37.4498	1267.0	1261.5	-4671.3	1035.2
37.4695	1256.0	1261.2	-4681.9	1034.9
37.4892	1242.0	1260.9	-4695.6	1034.6
37.5089	1300.0	1260.5	-4637.3	1034.2
37.5286	1232.0	1260.2	-4705.0	1033.9
37.5483	1338.0	1259.9	-4598.6	1033.6
37.5680	1208.0	1259.6	-4728.3	1033.3
37.5877	1202.0	1259.2	-4734.0	1032.9
37.6074	1271.0	1258.9	-4664.7	1032.6
37.6271	1220.0	1258.6	-4715.3	1032.3
37.6468	1324.0	1258.3	-4611.0	1032.0
37.6665	1236.0	1257.9	-4698.7	1031.6
37.6862	1257.0	1257.6	-4677.4	1031.3
37.7059	1241.0	1257.3	-4693.0	1031.0
37.7256	1255.0	1257.0	-4678.7	1030.7
37.7453	1283.0	1256.6	-4650.4	1030.3
37.7650	1323.0	1256.3	-4610.1	1030.0
37.7848	1300.0	1256.0	-4632.7	1029.7
37.8045	1269.0	1255.7	-4663.4	1029.4
37.8242	1272.0	1255.3	-4660.1	1029.0
37.8439	1272.0	1255.0	-4659.8	1028.7
37.8636	1295.0	1254.7	-4636.4	1028.4
37.8833	1237.0	1254.4	-4694.1	1028.1
37.9030	1176.0	1254.0	-4754.8	1027.7
37.9227	1285.0	1253.7	-4645.5	1027.4
37.9424	1193.0	1253.4	-4737.1	1027.1
37.9621	1217.0	1253.1	-4712.8	1026.8
37.9818	1264.0	1252.7	-4665.5	1026.4
38.0015	1227.0	1252.4	-4702.2	1026.1
38.0212	1295.0	1252.1	-4633.8	1025.8
38.0409	1227.0	1251.8	-4701.5	1025.5
38.0606	1250.0	1251.4	-4678.2	1025.1
38.0803	1282.0	1251.1	-4645.9	1024.8
38.1000	1274.0	1250.8	-4653.5	1024.5
38.1197	1255.0	1250.5	-4672.2	1024.2
38.1395	1248.0	1250.1	-4678.9	1023.8
38.1592	1214.0	1249.8	-4712.6	1023.5
38.1789	1301.0	1249.5	-4625.2	1023.2
38.1986	1219.0	1249.2	-4706.9	1022.9
38.2183	1266.0	1248.8	-4659.6	1022.5
38.2380	1289.0	1248.5	-4636.3	1022.2
38.2577	1304.0	1248.2	-4620.9	1021.9
38.2774	1231.0	1247.9	-4693.6	1021.6
38.2971	1284.0	1247.5	-4640.3	1021.2
38.3168	1235.0	1247.2	-4689.0	1020.9
38.3365	1196.0	1246.9	-4727.6	1020.6
38.3562	1276.0	1246.6	-4647.3	1020.3
38.3759	1216.0	1246.2	-4707.0	1019.9
38.3956	1269.0	1245.9	-4653.7	1019.6
38.4153	1237.0	1245.6	-4685.3	1019.3
38.4350	1252.0	1245.3	-4670.0	1019.0
38.4547	1263.0	1244.9	-4658.7	1018.6
38.4744	1274.0	1244.6	-4647.4	1018.3
38.4942	1235.0	1244.3	-4686.0	1018.0
38.5139	1203.0	1244.0	-4717.7	1017.7
38.5336	1227.0	1243.6	-4693.4	1017.3
38.5533	1285.0	1243.3	-4635.1	1017.0
38.5730	1223.0	1243.0	-4696.7	1016.7
38.5927	1259.0	1242.7	-4660.4	1016.4
38.6124	1228.0	1242.3	-4691.1	1016.0
38.6321	1220.0	1242.0	-4698.8	1015.7
38.6518	1297.0	1241.7	-4621.4	1015.4
38.6715	1222.0	1241.4	-4696.1	1015.1
38.6912	1229.0	1241.0	-4688.8	1014.7
38.7109	1231.0	1240.7	-4686.5	1014.4
38.7306	1208.0	1240.4	-4709.1	1014.1
38.7503	1264.0	1240.1	-4652.8	1013.8
38.7700	1249.0	1239.7	-4667.5	1013.4
38.7897	1201.0	1239.4	-4715.2	1013.1
38.8094	1250.0	1239.1	-4665.8	1012.8
38.8291	1242.0	1238.8	-4673.5	1012.5
38.8489	1302.0	1238.4	-4613.2	1012.1
38.8686	1276.0	1238.1	-4638.9	1011.8
38.8883	1193.0	1237.8	-4721.5	1011.5
38.9080	1225.0	1237.5	-4689.2	1011.2
38.9277	1298.0	1237.1	-4615.9	1010.8
38.9474	1208.0	1236.8	-4705.6	1010.5
38.9671	1203.0	1236.5	-4710.2	1010.2
38.9868	1261.0	1236.2	-4651.9	1009.9
39.0065	1225.0	1235.8	-4687.6	1009.5
39.0262	1194.0	1235.5	-4718.3	1009.2
39.0459	1162.0	1235.2	-4749.9	1008.9
39.0656	1307.0	1235.0	-4604.7	1008.7
39.0853	1209.0	1234.8	-4702.5	1008.4
39.1050	1251.0	1234.5	-4660.3	1008.2
39.1247	1264.0	1234.3	-4647.1	1008.0
39.1444	1188.0	1234.1	-4722.8	1007.8
39.1641	1285.0	1233.9	-4625.6	1007.6
39.1838	1226.0	1233.7	-4684.4	1007.4
39.2036	1278.0	1233.4	-4632.2	1007.1
39.2233	1215.0	1233.2	-4695.0	1006.9
39.2430	1280.0	1233.0	-4629.8	1006.7
39.2627	1203.0	1232.8	-4706.5	1006.5
39.2824	1187.0	1232.6	-4722.3	1006.3
39.3021	1219.0	1232.4	-4690.1	1006.1
39.3218	1235.0	1232.1	-4673.9	1005.8
39.3415	1190.0	1231.9	-4718.7	1005.6
39.3612	1250.0	1231.7	-4658.5	1005.4
39.3809	1170.0	1231.5	-4738.2	1005.2
39.4006	1252.0	1231.3	-4656.0	1005.0
39.4203	1210.0	1231.1	-4697.8	1004.8
39.4400	1242.0	1230.8	-4665.6	1004.5
39.4597	1257.0	1230.6	-4650.4	1004.3
39.4794	1234.0	1230.4	-4673.2	1004.1
39.4991	1248.0	1230.2	-4658.9	1003.9
39.5188	1222.0	1230.0	-4684.7	1003.7
39.5385	1301.0	1229.8	-4605.5	1003.4
39.5583	1249.0	1229.5	-4657.3	1003.2
39.5780	1211.0	1229.3	-4695.1	1003.0
39.5977	1207.0	1229.1	-4698.8	1002.8
39.6174	1222.0	1228.9	-4683.6	1002.6
39.6371	1237.0	1228.7	-4668.4	1002.4
39.6568	1260.0	1228.4	-4645.2	1002.1
39.6765	1278.0	1228.2	-4627.0	1001.9
39.6962	1202.0	1228.0	-4702.8	1001.7
39.7159	1217.0	1227.8	-4687.5	1001.5
39.7356	1235.0	1227.6	-4669.3	1001.3
39.7553	1249.0	1227.4	-4655.1	1001.1
39.7750	1180.0	1227.1	-4723.9	1000.8
39.7947	1239.0	1226.9	-4664.7	1000.6
39.8144	1259.0	1226.7	-4644.5	1000.4
39.8341	1193.0	1226.5	-4710.2	1000.2
39.8538	1259.0	1226.3	-4644.0	1000.0
39.8735	1227.0	1226.1	-4675.8	999.8
39.8932	1187.0	1225.8	-4715.6	999.5
39.9129	1220.0	1225.6	-4682.4	999.3
39.9327	1229.0	1225.4	-4673.2	999.1
39.9524	1242.0	1225.2	-4659.9	998.9
39.9721	1237.0	1225.0	-4664.7	998.7
39.9918	1147.0	1224.8	-4754.5	998.4
40.0115	1207.0	1224.5	-4694.3	998.2
40.0312	1227.0	1224.3	-4674.1	998.0
40.0509	1232.0	1224.1	-4668.8	997.8
40.0706	1245.0	1223.9	-4655.6	997.6
40.0903	1232.0	1223.7	-4668.4	997.4
40.1100	1135.0	1223.4	-4765.2	997.1
40.1297	1208.0	1223.1	-4691.9	996.8
40.1494	1206.0	1222.8	-4693.6	996.5
40.1691	1218.0	1222.5	-4681.3	996.2
40.1888	1214.0	1222.2	-4685.0	995.9
40.2085	1255.0	1221.9	-4643.7	995.6
40.2282	1260.0	1221.6	-4638.4	995.3
40.2479	1216.0	1221.3	-4682.1	995.0
40.2676	1233.0	1221.0	-4664.8	994.7
40.2874	1251.0	1220.7	-4646.5	994.4
40.3071	1218.0	1220.4	-4679.2	994.1
40.3268	1188.0	1220.1	-4708.9	993.8
40.3465	1217.0	1219.8	-4679.6	993.5
40.3662	1249.0	1219.5	-4647.3	993.2
40.3859	1152.0	1219.2	-4744.0	992.9
40.4056	1265.0	1218.9	-4630.7	992.6
40.4253	1246.0	1218.6	-4649.4	992.3
40.4450	1222.0	1218.3	-4673.1	992.0
40.4647	1146.0	1218.0	-4748.8	991.7
40.4844	1262.0	1217.7	-4632.5	991.4
40.5041	1242.0	1217.4	-4652.2	991.1
40.5238	1147.0	1217.1	-4746.9	990.8
40.5435	1191.0	1216.8	-4702.6	990.5
40.5632	1251.0	1216.5	-4642.3	990.2
40.5829	1197.0	1216.2	-4695.9	989.9
40.6026	1210.0	1215.9	-4682.6	989.6
40.6223	1220.0	1215.6	-4672.3	989.3
40.6421	1207.0	1215.3	-4685.0	989.0
40.6618	1228.0	1215.0	-4663.7	988.7
40.6815	1258.0	1214.7	-4633.4	988.4
40.7012	1155.0	1214.4	-4736.1	988.1
40.7209	1239.0	1214.1	-4651.8	987.8
40.7406	1182.0	1213.8	-4708.5	987.5
40.7603	1191.0	1213.5	-4699.2	987.2
40.7800	1201.0	1213.2	-4688.9	986.9
40.7997	1278.0	1212.9	-4611.6	986.6
40.8194	1218.0	1212.6	-4671.3	986.3
40.8391	1262.0	1212.3	-4627.0	986.0
40.8588	1213.0	1212.0	-4675.7	985.7
40.8785	1244.0	1211.7	-4644.4	985.4
40.8982	1190.0	1211.4	-4698.1	985.1
40.9179	1202.0	1211.1	-4685.8	984.8
40.9376	1201.0	1210.8	-4686.5	984.5
40.9573	1168.0	1210.5	-4719.2	984.2
40.9770	1217.0	1210.2	-4669.9	983.9
40.9968	1198.0	1209.9	-4688.6	983.6
41.0165	1211.0	1209.6	-4675.3	983.3
41.0362	1259.0	1209.3	-4627.0	982.9
41.0559	1225.0	1208.9	-4660.7	982.6
41.0756	1262.0	1208.6	-4623.4	982.3
41.0953	1254.0	1208.3	-4631.1	982.0
41.1150	1219.0	1208.0	-4665.8	981.7
41.1347	1200.0	1207.7	-4684.5	981.4
41.1544	1237.0	1207.4	-4647.2	981.1
41.1741	1238.0	1207.1	-4645.9	980.8
41.1938	1185.0	1206.8	-4698.6	980.5
41.2135	1205.0	1206.5	-4678.3	980.2
41.2332	1203.0	1206.2	-4680.0	979.9
41.2529	1241.0	1205.9	-4641.7	979.6
41.2726	1197.0	1205.6	-4685.4	979.3
41.2923	1206.0	1205.3	-4676.1	979.0
41.3120	1207.0	1205.0	-4674.8	978.7
41.3317	1221.0	1204.7	-4660.5	978.4
41.3515	1183.0	1204.4	-4698.2	978.1
41.3712	1208.0	1204.1	-4672.9	977.8
41.3909	1197.0	1203.8	-4683.6	977.5
41.4106	1235.0	1203.5	-4645.3	977.2
41.4303	1258.0	1203.2	-4622.0	976.9
41.4500	1197.0	1202.9	-4682.7	976.6
41.4697	1223.0	1202.6	-4656.4	976.3
41.4894	1163.0	1202.3	-4716.1	976.0
41.5091	1173.0	1202.0	-4705.8	975.7
41.5288	1183.0	1201.7	-4695.5	975.4
41.5485	1200.0	1201.4	-4678.1	975.1
41.5682	1198.0	1201.1	-4679.8	974.8
41.5879	1202.0	1200.8	-4675.5	974.5
41.6076	1261.0	1200.5	-4616.2	974.2
41.6273	1162.0	1200.2	-4714.9	973.9
41.6470	1181.0	1199.9	-4695.6	973.6
41.6667	1238.0	1199.6	-4638.3	973.3
41.6864	1215.0	1199.3	-4661.0	973.0
41.7061	1230.0	1199.0	-4645.7	972.7
41.7259	1221.0	1198.7	-4654.4	972.4
41.7456	1230.0	1198.4	-4645.1	972.1
41.7653	1197.0	1198.1	-4677.8	971.8
41.7850	1226.0	1197.8	-4648.5	971.5
41.8047	1199.0	1197.5	-4675.2	971.2
41.8244	1158.0	1197.2	-4715.9	970.9
41.8441	1232.0	1196.9	-4641.6	970.6
41.8638	1204.0	1196.6	-4669.3	970.3
41.8835	1216.0	1196.3	-4657.0	970.0
41.9032	1160.0	1196.0	-4712.7	969.7
41.9229	1172.0	1195.7	-4700.4	969.4
41.9426	1170.0	1195.4	-4702.1	969.1
41.9623	1139.0	1195.1	-4732.8	968.8
41.9820	1216.0	1194.8	-4655.5	968.5
42.0017	1161.0	1194.5	-4710.2	968.2
42.0214	1180.0	1194.2	-4690.9	967.8
42.0411	1172.0	1193.8	-4698.6	967.5
42.0608	1236.0	1193.5	-4634.3	967.2
42.0806	1191.0	1193.2	-4679.0	966.9
42.1003	1145.0	1192.9	-4724.7	966.6
42.1200	1165.0	1192.6	-4704.4	966.3
42.1397	1206.0	1192.3	-4663.1	966.0
42.1594	1167.0	1192.0	-4701.8	965.7
42.1791	1256.0	1191.7	-4612.5	965.4
42.1988	1157.0	1191.4	-4711.2	965.1
42.2185	1218.0	1191.1	-4649.9	964.8
42.2382	1127.0	1190.8	-4740.6	964.5
42.2579	1183.0	1191.3	-4685.1	965.0
42.2776	1273.0	1191.8	-4595.5	965.5
42.2973	1173.0	1192.3	-4696.0	966.0
42.3170	1161.0	1192.7	-4708.5	966.4
42.3367	1196.0	1193.2	-4674.0	966.9
42.3564	1250.0	1193.7	-4620.4	967.4
42.3761	1230.0	1194.2	-4640.9	967.9
42.3958	1172.0	1194.6	-4699.4	968.3
42.4155	1221.0	1195.1	-4650.9	968.8
42.4353	1179.0	1195.6	-4693.3	969.3
42.4550	1136.0	1196.1	-4736.8	969.8
42.4747	1205.0	1196.5	-4668.3	970.2
42.4944	1144.0	1197.0	-4729.8	970.7
42.5141	1214.0	1197.5	-4660.2	971.2
42.5338	1226.0	1198.0	-4648.7	971.7
42.5535	1219.0	1198.4	-4656.2	972.1
42.5732	1189.0	1198.9	-4686.7	972.6
42.5929	1268.0	1199.4	-4608.1	973.1
42.6126	1195.0	1199.9	-4681.6	973.6
42.6323	1167.0	1200.3	-4710.1	974.0
42.6520	1195.0	1200.8	-4682.6	974.5
42.6717	1189.0	1201.3	-4689.0	975.0
42.6914	1223.0	1201.8	-4655.5	975.5
42.7111	1166.0	1202.2	-4713.0	975.9
42.7308	1171.0	1202.7	-4708.5	976.4
42.7505	1226.0	1203.2	-4654.0	976.9
42.7702	1248.0	1203.7	-4632.4	977.4
42.7900	1180.0	1204.2	-4700.9	977.9
42.8097	1162.0	1204.6	-4719.4	978.3
42.8294	1173.0	1205.1	-4708.9	978.8
42.8491	1234.0	1205.6	-4648.3	979.3
42.8688	1213.0	1206.1	-4669.8	979.8
42.8885	1213.0	1206.5	-4670.3	980.2
42.9082	1200.0	1207.0	-4683.8	980.7
42.9279	1184.0	1207.5	-4700.2	981.2
42.9476	1224.0	1208.0	-4660.7	981.7
42.9673	1219.0	1208.4	-4666.2	982.1
42.9870	1174.0	1208.9	-4711.7	982.6
43.0067	1201.0	1209.4	-4685.1	983.1
43.0264	1198.0	1209.9	-4688.6	983.6
43.0461	1218.0	1210.3	-4669.1	984.0
43.0658	1140.0	1210.8	-4747.6	984.5
43.0855	1264.0	1216.9	-4629.7	985.0
43.1052	1186.0	1217.8	-4708.5	985.5
43.1249	1139.0	1218.6	-4756.4	985.9
43.1447	1171.0	1218.8	-4724.5	985.7
43.1644	1166.0	1219.0	-4729.7	985.5
43.1841	1186.0	1219.3	-4710.0	985.2
43.2038	1182.0	1219.6	-4714.3	985.0
43.2235	1214.0	1219.9	-4682.7	984.7
43.2432	1227.0	1220.4	-4670.1	984.5
43.2629	1152.0	1220.9	-4745.7	984.2
43.2826	1235.0	1221.6	-4663.3	984.0
43.3023	1209.0	1222.3	-4690.1	983.8
43.3220	1188.0	1223.2	-4711.9	983.5
43.3417	1205.0	1228.1	-4699.8	983.3
43.3614	1237.0	1229.5	-4669.3	983.0
43.3811	1174.0	1231.3	-4734.0	982.8
43.4008	1235.0	1233.3	-4675.1	982.5
43.4205	1178.0	1235.7	-4734.5	982.3
43.4402	1191.0	1238.6	-4724.3	982.1
43.4599	1221.0	1242.1	-4697.8	981.8
43.4796	1212.0	1246.3	-4711.0	981.6
43.4994	1242.0	1251.5	-4686.3	981.3
43.5191	1230.0	1258.0	-4704.7	981.1
43.5388	1238.0	1266.2	-4704.9	980.9
43.5585	1358.0	1276.8	-4595.5	980.6
43.5782	1316.0	1290.7	-4651.5	980.4
43.5979	1334.0	1309.8	-4652.5	980.1
43.6176	1341.0	1337.6	-4673.3	979.9
43.6373	1402.0	1383.9	-4658.7	979.6
43.6570	1553.0	1474.7	-4598.5	979.4
43.6767	1774.0	1664.6	-4567.3	979.2
43.6964	2073.0	2030.6	-4634.3	978.9
43.7161	2608.0	2613.6	-4682.4	978.7
43.7358	3317.0	3302.7	-4662.4	978.4
43.7555	3895.0	3701.0	-4482.7	978.2
43.7752	3753.0	3420.3	-4344.1	977.9
43.7949	2917.0	2753.3	-4513.1	977.7
43.8146	2179.0	2144.2	-4641.9	977.5
43.8343	1819.0	1749.2	-4607.0	977.2
43.8540	1544.0	1546.2	-4678.9	977.0
43.8738	1456.0	1460.6	-4681.3	976.7
43.8935	1516.0	1438.6	-4599.4	976.5
43.9132	1508.0	1465.2	-4634.0	976.3
43.9329	1622.0	1563.1	-4617.8	976.0
43.9526	1911.0	1779.3	-4545.1	975.8
43.9723	2162.0	2146.2	-4661.0	975.5
43.9920	2646.0	2605.6	-4636.3	975.3
44.0117	3260.0	2913.1	-4329.8	975.0
44.0314	3259.0	2772.0	-4189.7	974.8
44.0511	2657.0	2324.1	-4343.8	974.6
44.0708	2071.0	1887.3	-4493.0	974.3
44.0905	1650.0	1600.5	-4627.2	974.1
44.1102	1408.0	1437.8	-4706.6	973.8
44.1299	1314.0	1358.6	-4721.4	973.6
44.1496	1355.0	1319.3	-4641.1	973.3
44.1693	1259.0	1296.8	-4714.6	973.1
44.1890	1285.0	1282.0	-4673.8	972.9
44.2087	1268.0	1271.5	-4680.2	972.6
44.2285	1265.0	1263.7	-4675.4	972.4
44.2482	1237.0	1257.9	-4697.7	972.1
44.2679	1257.0	1253.7	-4673.4	971.9
44.2876	1167.0	1250.6	-4760.3	971.6
44.3073	1254.0	1248.5	-4671.2	971.4
44.3270	1342.0	1247.2	-4581.9	971.2
44.3467	1223.0	1246.6	-4700.3	970.9
44.3664	1206.0	1246.7	-4717.5	970.7
44.3861	1228.0	1247.5	-4696.3	970.4
44.4058	1226.0	1249.0	-4699.8	970.2
44.4255	1224.0	1251.3	-4704.0	970.0
44.4452	1231.0	1249.0	-4694.8	969.7
44.4649	1194.0	1253.5	-4736.2	969.5
44.4846	1254.0	1259.1	-4681.9	969.2
44.5043	1308.0	1266.2	-4635.0	969.0
44.5240	1157.0	1275.3	-4795.0	968.7
44.5437	1180.0	1286.8	-4783.5	968.5
44.5634	1239.0	1301.7	-4739.4	968.3
44.5832	1296.0	1321.2	-4702.0	968.0
44.6029	1309.0	1347.3	-4715.1	967.8
44.6226	1378.0	1383.5	-4682.3	967.5
44.6423	1435.0	1437.5	-4679.2	967.3
44.6620	1519.0	1529.5	-4687.2	967.0
44.6817	1776.0	1711.5	-4612.2	966.8
44.7014	2158.0	2088.5	-4607.2	966.6
44.7211	2674.0	2795.9	-4798.6	966.3
44.7408	3681.0	3900.2	-4895.9	966.1
44.7605	5140.0	5161.2	-4697.9	965.8
44.7802	6040.0	5812.6	-4449.3	965.6
44.7999	5492.0	5204.4	-4389.1	965.3
44.8196	4063.0	3948.9	-4562.7	965.1
44.8393	2966.0	2830.7	-4541.4	964.9
44.8590	2024.0	2103.5	-4756.2	964.6
44.8787	1741.0	1715.3	-4651.1	964.4
44.8984	1603.0	1527.3	-4601.1	964.1
44.9181	1433.0	1432.3	-4676.1	963.9
44.9379	1388.0	1376.4	-4665.1	963.7
44.9576	1281.0	1339.0	-4734.7	963.4
44.9773	1288.0	1311.7	-4700.5	963.2
44.9970	1312.0	1291.2	-4655.9	962.9
45.0167	1241.0	1275.2	-4711.0	962.7
45.0364	1263.0	1262.6	-4676.4	962.4
45.0561	1337.0	1252.5	-4592.2	962.2
45.0758	1223.0	1244.2	-4697.9	962.0
45.0955	1199.0	1237.3	-4715.0	961.7
45.1152	1233.0	1231.5	-4675.3	961.5
45.1349	1184.0	1226.6	-4719.4	961.2
45.1546	1258.0	1222.4	-4641.2	961.0
45.1743	1206.0	1218.8	-4689.6	960.7
45.1940	1181.0	1215.7	-4711.4	960.5
45.2137	1223.0	1212.9	-4666.6	960.3
45.2334	1260.0	1210.4	-4627.2	960.0
45.2531	1170.0	1208.2	-4715.0	959.8
45.2728	1206.0	1206.3	-4677.0	959.5
45.2926	1232.0	1204.5	-4649.2	959.3
45.3123	1212.0	1202.9	-4667.6	959.1
45.3320	1170.0	1201.4	-4708.2	958.8
45.3517	1223.0	1200.1	-4653.8	958.6
45.3714	1167.0	1198.8	-4708.6	958.3
45.3911	1186.0	1197.7	-4688.5	958.1
45.4108	1182.0	1196.6	-4691.4	957.8
45.4305	1083.0	1195.7	-4789.4	957.6
45.4502	1195.0	1194.5	-4676.2	957.1
45.4699	1179.0	1193.3	-4691.1	956.6
45.4896	1243.0	1182.3	-4616.1	956.0
45.5093	1111.0	1181.8	-4747.6	955.5
45.5290	1186.0	1181.3	-4672.1	955.0
45.5487	1197.0	1180.8	-4660.5	954.5
45.5684	1244.0	1180.3	-4613.0	954.0
45.5881	1163.0	1179.7	-4693.5	953.4
45.6078	1191.0	1179.2	-4665.0	952.9
45.6275	1171.0	1178.7	-4684.5	952.4
45.6472	1154.0	1178.2	-4700.9	951.9
45.6670	1169.0	1177.7	-4685.4	951.4
45.6867	1181.0	1177.2	-4672.9	950.9
45.7064	1175.0	1176.6	-4678.4	950.3
45.7261	1197.0	1176.1	-4655.9	949.8
45.7458	1203.0	1175.6	-4649.3	949.3
45.7655	1209.0	1175.1	-4642.8	948.8
45.7852	1192.0	1174.6	-4659.3	948.3
45.8049	1192.0	1174.0	-4658.8	947.7
45.8246	1159.0	1173.5	-4691.3	947.2
45.8443	1165.0	1173.0	-4684.8	946.7
45.8640	1147.0	1172.5	-4702.2	946.2
45.8837	1182.0	1172.0	-4666.7	945.7
45.9034	1143.0	1171.4	-4705.2	945.1
45.9231	1162.0	1170.9	-4685.7	944.6
45.9428	1150.0	1170.4	-4697.2	944.1
45.9625	1174.0	1169.9	-4672.6	943.6
45.9822	1206.0	1169.4	-4640.1	943.1
46.0019	1130.0	1168.9	-4715.6	942.5
46.0217	1127.0	1168.3	-4718.1	942.0
46.0414	1175.0	1167.8	-4669.6	941.5
46.0611	1146.0	1167.3	-4698.0	941.0
46.0808	1159.0	1166.8	-4684.5	940.5
46.1005	1194.0	1166.3	-4649.0	940.0
46.1202	1165.0	1165.7	-4677.5	939.4
46.1399	1194.0	1165.2	-4648.0	938.9
46.1596	1166.0	1164.7	-4675.4	938.4
46.1793	1236.0	1164.2	-4604.9	937.9
46.1990	1140.0	1163.7	-4700.4	937.4
46.2187	1145.0	1163.1	-4694.9	936.8
46.2384	1184.0	1162.6	-4655.4	936.3
46.2581	1164.0	1162.1	-4674.9	935.8
46.2778	1064.0	1161.6	-4774.3	935.3
46.2975	1117.0	1161.2	-4720.9	934.9
46.3172	1167.0	1160.8	-4670.5	934.4
46.3369	1134.0	1160.3	-4703.1	934.0
46.3566	1160.0	1159.9	-4676.7	933.6
46.3764	1190.0	1159.5	-4646.2	933.2
46.3961	1118.0	1159.1	-4717.8	932.8
46.4158	1150.0	1158.7	-4685.4	932.4
46.4355	1196.0	1158.2	-4639.0	931.9
46.4552	1183.0	1157.8	-4651.6	931.5
46.4749	1164.0	1157.4	-4670.2	931.1
46.4946	1222.0	1157.0	-4611.7	930.7
46.5143	1108.0	1156.6	-4725.3	930.3
46.5340	1145.0	1156.2	-4687.9	929.9
46.5537	1145.0	1155.7	-4687.5	929.4
46.5734	1146.0	1155.3	-4686.1	929.0
46.5931	1179.0	1154.9	-4652.7	928.6
46.6128	1245.0	1154.5	-4586.2	928.2
46.6325	1133.0	1154.1	-4697.8	927.8
46.6522	1171.0	1153.7	-4659.4	927.3
46.6719	1197.0	1153.2	-4633.0	926.9
46.6916	1137.0	1152.8	-4692.6	926.5
46.7113	1175.0	1152.4	-4654.1	926.1
46.7311	1165.0	1152.0	-4663.7	925.7
46.7508	1177.0	1151.6	-4651.3	925.3
46.7705	1125.0	1151.1	-4702.9	924.8
46.7902	1207.0	1150.7	-4620.5	924.4
46.8099	1156.0	1150.3	-4671.1	924.0
46.8296	1099.0	1149.9	-4727.6	923.6
46.8493	1176.0	1149.5	-4650.2	923.2
46.8690	1142.0	1149.1	-4683.8	922.8
46.8887	1143.0	1148.6	-4682.4	922.3
46.9084	1178.0	1148.2	-4647.0	921.9
46.9281	1099.0	1147.8	-4725.6	921.5
46.9478	1146.0	1147.4	-4678.1	921.1
46.9675	1195.0	1147.0	-4628.7	920.7
46.9872	1149.0	1146.5	-4674.3	920.2
47.0069	1116.0	1146.1	-4706.9	919.8
47.0266	1153.0	1145.7	-4669.5	919.4
47.0463	1152.0	1145.3	-4670.0	919.0
47.0660	1163.0	1144.9	-4658.6	918.6
47.0858	1224.0	1144.5	-4597.2	918.2
47.1055	1168.0	1144.0	-4652.8	917.7
47.1252	1150.0	1143.6	-4670.4	917.3
47.1449	1103.0	1143.2	-4717.0	916.9
47.1646	1193.0	1142.8	-4626.5	916.5
47.1843	1149.0	1142.4	-4670.1	916.1
47.2040	1140.0	1142.0	-4678.7	915.7
47.2237	1190.0	1141.5	-4628.3	915.2
47.2434	1243.0	1141.1	-4574.9	914.8
47.2631	1126.0	1140.7	-4691.5	914.4
47.2828	1177.0	1153.0	-4652.7	914.0
47.3025	1186.0	1153.3	-4644.0	913.6
47.3222	1137.0	1153.7	-4693.4	913.1
47.3419	1211.0	1154.1	-4619.9	912.7
47.3616	1162.0	1154.7	-4669.4	912.3
47.3813	1092.0	1155.3	-4740.1	911.9
47.4010	1187.0	1156.0	-4645.8	911.5
47.4207	1086.0	1156.9	-4747.7	911.1
47.4404	1197.0	1157.9	-4637.7	910.6
47.4602	1172.0	1159.1	-4663.8	910.2
47.4799	1141.0	1160.4	-4696.2	909.8
47.4996	1142.0	1162.0	-4696.7	909.4
47.5193	1157.0	1163.8	-4683.6	909.0
47.5390	1212.0	1165.9	-4630.7	908.6
47.5587	1187.0	1168.4	-4658.1	908.1
47.5784	1221.0	1171.3	-4627.0	907.7
47.5981	1231.0	1174.6	-4620.4	907.3
47.6178	1177.0	1178.6	-4678.4	906.9
47.6375	1242.0	1183.4	-4618.1	906.5
47.6572	1228.0	1189.0	-4637.8	906.0
47.6769	1191.0	1195.8	-4681.6	905.6
47.6966	1167.0	1204.1	-4713.8	905.2
47.7163	1158.0	1214.2	-4733.0	904.8
47.7360	1211.0	1226.8	-4692.6	904.4
47.7557	1174.0	1242.7	-4745.5	904.0
47.7754	1255.0	1263.0	-4684.8	903.5
47.7951	1183.0	1289.5	-4783.3	903.1
47.8149	1295.0	1325.3	-4707.0	902.7
47.8346	1248.0	1375.0	-4803.8	902.3
47.8543	1349.0	1451.0	-4778.7	901.9
47.8740	1465.0	1583.3	-4795.0	901.5
47.8937	1720.0	1841.5	-4798.2	901.0
47.9134	2069.0	2347.3	-4955.1	900.6
47.9331	2935.0	3233.6	-4975.4	900.2
47.9528	4171.0	4508.2	-5013.9	899.8
47.9725	5720.0	5812.1	-4768.8	899.4
47.9922	6102.0	6239.7	-4814.4	898.9
48.0119	4968.0	5351.0	-5059.8	898.5
48.0316	3770.0	3978.0	-4884.7	898.1
48.0513	2841.0	2837.3	-4673.0	897.7
48.0710	2183.0	2109.4	-4603.2	897.3
48.0907	1880.0	1715.6	-4512.3	896.9
48.1104	1568.0	1516.9	-4625.6	896.4
48.1301	1444.0	1411.1	-4643.9	896.0
48.1498	1385.0	1346.7	-4638.5	895.6
48.1696	1342.0	1302.3	-4637.1	895.2
48.1893	1288.0	1269.9	-4658.6	894.8
48.2090	1249.0	1245.2	-4672.9	894.4
48.2287	1215.0	1225.9	-4687.7	893.9
48.2484	1244.0	1210.6	-4643.4	893.5
48.2681	1236.0	1198.2	-4638.9	893.1
48.2878	1225.0	1188.0	-4639.7	892.7
48.3075	1124.0	1179.5	-4732.2	892.3
48.3272	1205.0	1172.3	-4644.1	891.8
48.3469	1212.0	1166.2	-4631.0	891.4
48.3666	1174.0	1161.0	-4663.7	891.0
48.3863	1151.0	1156.4	-4682.1	890.6
48.4060	1094.0	1152.4	-4735.1	890.2
48.4257	1165.0	1148.8	-4660.6	889.8
48.4454	1167.0	1145.7	-4655.4	889.3
48.4651	1163.0	1142.9	-4656.6	888.9
48.4848	1158.0	1140.3	-4659.1	888.5
48.5045	1140.0	1138.0	-4674.8	888.1
48.5243	1095.0	1135.9	-4717.6	887.7
48.5440	1134.0	1133.9	-4676.7	887.2
48.5637	1129.0	1132.2	-4679.9	886.8
48.5834	1167.0	1130.5	-4640.3	886.4
48.6031	1071.0	1129.0	-4734.7	886.0
48.6228	1141.0	1128.6	-4664.4	886.7
48.6425	1177.0	1128.4	-4628.1	887.3
48.6622	1148.0	1128.2	-4657.0	888.0
48.6819	1143.0	1128.1	-4661.8	888.7
48.7016	1142.0	1115.6	-4650.4	889.3
48.7213	1162.0	1116.3	-4631.1	890.0
48.7410	1140.0	1117.0	-4653.7	890.7
48.7607	1151.0	1117.6	-4643.4	891.3
48.7804	1135.0	1118.3	-4660.1	892.0
48.8001	1110.0	1119.0	-4685.7	892.7
48.8198	1140.0	1119.7	-4656.4	893.3
48.8395	1132.0	1120.3	-4665.1	894.0
48.8592	1097.0	1121.0	-4700.7	894.7
48.8790	1122.0	1121.7	-4676.4	895.4
48.8987	1109.0	1122.3	-4690.1	896.0
48.9184	1124.0	1123.0	-4675.7	896.7
48.9381	1137.0	1123.7	-4663.4	897.4
48.9578	1072.0	1124.3	-4729.1	898.0
48.9775	1179.0	1125.0	-4622.8	898.7
48.9972	1117.0	1125.7	-4685.4	899.4
49.0169	1139.0	1126.3	-4664.1	900.0
49.0366	1161.0	1127.0	-4642.8	900.7
49.0563	1115.0	1127.7	-4689.4	901.4
49.0760	1128.0	1128.3	-4677.1	902.0
49.0957	1195.0	1129.0	-4610.8	902.7
49.1154	1177.0	1129.7	-4629.4	903.4
49.1351	1114.0	1130.3	-4693.1	904.0
49.1548	1105.0	1131.0	-4702.8	904.7
49.1745	1116.0	1131.7	-4692.4	905.4
49.1942	1191.0	1132.4	-4618.1	906.1
49.2139	1140.0	1133.0	-4669.8	906.7
49.2337	1153.0	1133.7	-4657.4	907.4
49.2534	1179.0	1134.4	-4632.1	908.1
49.2731	1146.0	1135.0	-4665.8	908.7
49.2928	1210.0	1135.7	-4602.5	909.4
49.3125	1108.0	1136.4	-4705.1	910.1
49.3322	1128.0	1137.0	-4685.8	910.7
49.3519	1158.0	1137.7	-4656.5	911.4
49.3716	1173.0	1138.4	-4642.1	912.1
[truncated: 3,584 more rows]
